# Supplementary material
Source: publisher figshare collection journal article supplement (https://gsajournals.figshare.com/ndownloader/files/24382274)
Supplement: Supplementary file 1 [file 24382274]

## Sheet: LVS_CF_Nomination_Details
Table S5: Summary of nominated UVR-responsive strain characteristics
ORF	Gene	LagVStallUntreated	LagVStallUVR-Treated	dLagVStall	LagVStall_pVal_tt	LagVStall_qVal_tt	FitnessUntreated	FitnessUVR-Treated	dFitness	Fitness_pVal_tt	Fitness_qVal_tt	DDR-Annotation	DSBR	NER	PRR	UV-Sensitivity	CC_Regulated	ESR_Gene	UV_Transcriptional_ResponseUntreated	UV_Transcriptional_ResponseUVR-Treated	Mitochondrial_Annotation	HS_Complementaion	Pred_HS_Homolog	Yeast_Gene_Description	HS_Complementaion	Pred_HS_Homolog	Yeast_Gene_Description
YOR374W	ALD4	4.39258	6.47398	2.08141	0.000215064	0.00867572	0.706882	-0.946438	-1.65332	0.0307118	0.145322						X	X			X	ALDH2	ALDH16A1,ALDH1A1,ALDH1A2,ALDH1A3,ALDH1B1,ALDH1L1,ALDH1L2,ALDH2,ALDH6A1,ALDH8A1,ALDH9A1	Mitochondrial aldehyde dehydrogenase; required for growth on ethanol and conversion of acetaldehyde to acetate; phosphorylated; activity is K+ dependent; utilizes NADP+ or NAD+ equally as coenzymes; expression is glucose repressed; can substitute for cytosolic NADP-dependent aldehyde dehydrogenase when directed to the cytosol; human homolog ALDH2 can complement yeast ald4 mutant
YDR375C	BCS1	15.7018	10.583	-5.11883	0.00305805	0.035671	-6.55335	-3.80764	2.74572	0.181776	0.358154										X	BCS1L	BCS1L	Protein translocase and chaperone required for Complex III assembly; member of the AAA ATPase family; forms a homo-oligomeric complex in the mitochondrial inner membrane that translocates the C-terminal domain of Rip1p from the matrix across the inner membrane and delivers it to an assembly intermediate of respiratory Complex III; also required for assembly of the Qcr10p subunit; mutation is func…		GPD1,GPD1L	NAD-dependent glycerol 3-phosphate dehydrogenase; expression is controlled by an oxygen-independent signaling pathway required to regulate metabolism under anoxic conditions; located in cytosol and mitochondria; constitutively active but is inactivated via phosphorylation by energy-stress responsive kinase SNF1; GPD2 has a paralog, GPD1, that arose from the whole genome duplication
YMR190C	SGS1	-7.75006	-3.42072	4.32934	6.70018e-05	0.0040543	-6.25749	-12.3396	-6.08213	2.26554e-07	2.92866e-05	X	X			X	X			X		BLM, WRN	BLM,RECQL,RECQL4,RECQL5,WRN	RecQ family nucleolar DNA helicase; role in genome integrity maintenance, chromosome synapsis, meiotic joint molecule/crossover formation; stimulates activity of Top3p; rapidly lost in response to rapamycin in Rrd1p-dependent manner; forms nuclear foci upon DNA replication stress; yeast SGS1 complements mutations in human homolog BLM implicated in Bloom syndrome; also similar to human WRN implica…			Protein that binds Sin3p in a two-hybrid assay; STB6 has a paralog, STB2, that arose from the whole genome duplication
YGL020C	GET1	-0.962184	1.27376	2.23594	0.0678717	0.20386	0.173801	-2.81582	-2.98962	0.000943334	0.0189189										X	CAMLG, WRB	WRB	Subunit of the GET complex; involved in insertion of proteins into the ER membrane; required for the retrieval of HDEL proteins from the Golgi to the ER in an ERD2 dependent fashion and for normal mitochondrial morphology and inheritance			Transporter of the mitochondrial inner membrane that exports magnesium; involved in mitochondrial Mg2+ homeostasis; has similarity to human mitochondrial ATP-Mg/Pi carriers
YKL055C	OAR1	9.54541	4.28447	-5.26095	0.00278698	0.0342999	-8.45338	-5.55909	2.89429	0.0045596	0.0531748										X	CBR4	DECR1,HSD17B8,HSDL2	Mitochondrial 3-oxoacyl-[acyl-carrier-protein] reductase; may comprise a type II mitochondrial fatty acid synthase along with Mct1p; human homolog CBR4 complements yeast null mutant		RAD51D	Protein that stimulates strand exchange; stimulates strand exchange by stabilizing the binding of Rad51p to single-stranded DNA; involved in the recombinational repair of double-strand breaks in DNA during vegetative growth and meiosis; forms heterodimer with Rad57p
YDR204W	COQ4	14.8584	11.2846	-3.57382	0.00482324	0.0454839	-7.98236	-4.79623	3.18614	0.219606	0.388885							X			X	COQ4	COQ4	Protein with a role in ubiquinone (Coenzyme Q) biosynthesis; possibly functioning in stabilization of Coq7p; located on matrix face of mitochondrial inner membrane; component of a mitochondrial ubiquinone-synthesizing complex; human homolog COQ4 can complement yeast coq4 null mutant		CAMK1,CAMK1D,CAMK1G,CAMKV,CHEK2,PNCK,PRKD1,PRKD2,PRKD3,PSKH1,PSKH2	Cell-cycle checkpoint S/T protein kinase; required for transient G2/M arrest after DNA damage, damage-induced transcription, and nuclear-to-cytoplasmic redistribution of Rnr2p-Rnr4p after genotoxic stress and iron deprivation; phosphorylates repair protein Rad55p, transcriptional repressor Sml1p, superoxide dismutase, and ribonucleotide reductase inhibitors Crt1p and Dif1p; functions in the Mec1p…
YML110C	COQ5	15.8968	11.812	-4.08474	0.00263532	0.0334591	-10.5706	-7.94671	2.62393	0.106863	0.276939						X	X			X	COQ5	COQ3,COQ5,WBSCR27	2-hexaprenyl-6-methoxy-1,4-benzoquinone methyltransferase; involved in ubiquinone (Coenzyme Q) biosynthesis; localizes to the matrix face of the mitochondrial inner membrane in a large complex with other ubiquinone biosynthetic enzymes; respiratory defect of the null mutant is partially complemented by human COQ5
YGR255C	COQ6	18.5246	10.8124	-7.71215	0.000521429	0.0129443	-9.71922	-7.51039	2.20883	0.117123	0.293439										X	COQ6	COQ6,KMO	Flavin-dependent monooxygenase involved in ubiquinone biosynthesis; responsible for hydroxylation at position C5 and deamination at C4 during ubiquinone (Coenzyme Q) biosynthesis; localizes to matrix face of mitochondrial inner membrane in a large complex with other ubiquinone biosynthetic enzymes; human homolog COQ6 can complement yeast null mutant and is implicated in steroid-resistant nephroti…			Transcription factor; involved in regulation of invasive growth and starch degradation; controls the activation of FLO11 and STA2 in response to nutritional signals; forms a heterodimer with Flo8p that interacts with the Swi/Snf complex during transcriptional activation of FLO1, FLO11, and STA1
YBL039C	URA7	-1.55322	-0.689642	0.863577	0.00102128	0.0197754	1.03076	-0.0172827	-1.04804	0.066681	0.220211							X				CTPS1, CTPS2	CTPS1,CTPS2	Major CTP synthase isozyme (see also URA8); catalyzes the ATP-dependent transfer of the amide nitrogen from glutamine to UTP, forming CTP, the final step in de novo biosynthesis of pyrimidines; involved in phospholipid biosynthesis; capable of forming cytoplasmic filaments termed cytoophidium, especially during conditions of glucose depletion; URA7 has a paralog, URA8, that arose from the whole g…	ALDH2	ALDH16A1,ALDH1A1,ALDH1A2,ALDH1A3,ALDH1B1,ALDH1L1,ALDH1L2,ALDH2,ALDH6A1,ALDH8A1,ALDH9A1	Mitochondrial aldehyde dehydrogenase; required for growth on ethanol and conversion of acetaldehyde to acetate; phosphorylated; activity is K+ dependent; utilizes NADP+ or NAD+ equally as coenzymes; expression is glucose repressed; can substitute for cytosolic NADP-dependent aldehyde dehydrogenase when directed to the cytosol; human homolog ALDH2 can complement yeast ald4 mutant
YJR103W	URA8	2.47023	0.867469	-1.60277	0.0010603	0.0200481	1.67482	1.56372	-0.111103	0.613423	0.595787											CTPS1, CTPS2	CTPS1,CTPS2	Minor CTP synthase isozyme (see also URA7); catalyzes the ATP-dependent transfer of the amide nitrogen from glutamine to UTP, forming CTP, the final step in de novo biosynthesis of pyrimidines; involved in phospholipid biosynthesis; capable of forming cytoplasmic filaments termed cytoophidium, especially during conditions of glucose depletion; URA8 has a paralog, URA7, that arose from the whole g…		ERCC6,ERCC6L,ERCC6L2	Protein involved in transcription-coupled nucleotide excision repair; repairs UV-induced DNA lesions; recruitment to DNA lesions is dependent on an elongating RNA polymerase II; homolog of human CSB protein
YLR192C	HCR1	-5.51347	-3.65717	1.8563	0.00199706	0.0284023	1.82172	1.01569	-0.80603	0.0919503	0.2588											EIF3J	EIF3J	eIF3j component of translation initiation factor 3 (eIF3); dual function protein involved in translation initiation as a substoichiometric component (eIF3j) of eIF3; required for 20S pre-rRNA processing; required at post-transcriptional step for efficient retrotransposition; absence decreases Ty1 Gag:GFP protein levels; binds eIF3 subunits Rpg1p, Prt1p and 18S rRNA; eIF3 also involved in programm…			Mitochondrial ribosomal protein of the small subunit; also predicted to be an S-adenosylmethionine-dependent RNA methyltransferase
YPL086C	ELP3	-1.11582	1.2609	2.37672	0.0815811	0.226199	-0.787186	-3.14457	-2.35738	0.00022108	0.00769552							X				ELP3	ELP3	Subunit of Elongator complex; Elongator is required for modification of wobble nucleosides in tRNA; exhibits histone acetyltransferase activity that is directed to histones H3 and H4; disruption confers resistance to K. lactis zymotoxin; human homolog ELP3 can partially complement yeast elp3 null mutant
YAL039C	CYC3	12.5532	10.2786	-2.27461	0.00252915	0.0330897	-6.27094	-4.87934	1.3916	0.255721	0.418524										X	HCCS	HCCS	Cytochrome c heme lyase (holocytochrome c synthase); attaches heme to apo-cytochrome c (Cyc1p or Cyc7p) in mitochondrial intermembrane space; human homolog HCCS implicated in microphthalmia with linear skin defects (MLS), and can complement yeast null mutant		GART	Enzyme of the 'de novo' purine nucleotide biosynthetic pathway; contains aminoimidazole ribotide synthetase and glycinamide ribotide synthetase activities
YDL125C	HNT1	0.652072	-1.21029	-1.86236	0.00015835	0.00730043	0.541123	1.53703	0.99591	0.0494643	0.190096											HINT1	HINT1,HINT2	Adenosine 5'-monophosphoramidase; interacts physically and genetically with Kin28p, a CDK and TFIIK subunit, and genetically with CAK1; member of histidine triad (HIT) superfamily of nucleotide-binding proteins; protein abundance increases in response to DNA replication stress; human homolog HINT1 can complement yeast hnt1 mutant	COQ6	COQ6,KMO	Flavin-dependent monooxygenase involved in ubiquinone biosynthesis; responsible for hydroxylation at position C5 and deamination at C4 during ubiquinone (Coenzyme Q) biosynthesis; localizes to matrix face of mitochondrial inner membrane in a large complex with other ubiquinone biosynthetic enzymes; human homolog COQ6 can complement yeast null mutant and is implicated in steroid-resistant nephroti…
YLR032W	RAD5	-0.483555	2.59757	3.08113	3.61452e-06	0.00045645	2.6131	-4.42743	-7.04053	6.15764e-11	3.82503e-08	X	X		X	X	X					HLTF	HLTF	DNA helicase/Ubiquitin ligase; involved in error-free DNA damage tolerance (DDT), replication fork regression during postreplication repair by template switching, error-prone translesion synthesis; promotes synthesis of free and PCNA-bound polyubiquitin chains by Ubc13p-Mms2p; forms nuclear foci upon DNA replication stress; associates with native telomeres, cooperates with homologous recombinatio…		RPS8	Protein component of the small (40S) ribosomal subunit; homologous to mammalian ribosomal protein S8, no bacterial homolog; RPS8A has a paralog, RPS8B, that arose from the whole genome duplication
YDR315C	IPK1	-3.12675	-0.953971	2.17278	0.00255441	0.0332702	-2.25115	-2.42424	-0.173086	0.524879	0.561005											IPPK	IPPK	Inositol 1,3,4,5,6-pentakisphosphate 2-kinase; nuclear protein required for synthesis of 1,2,3,4,5,6-hexakisphosphate (phytate), which is integral to cell function; has 2 motifs conserved in other fungi; ipk1 gle1 double mutant is inviable; human IPPK can complement ipk1 null mutant			Purine-cytosine permease; mediates purine (adenine, guanine, and hypoxanthine) and cytosine accumulation; relative distribution to the vacuole increases upon DNA replication stress
YOR226C	ISU2	-0.828611	-2.51216	-1.68355	0.000252508	0.00928365	0.172443	-0.273426	-0.445869	0.139642	0.317959										X	ISCU	ISCU	Mitochondrial protein required for iron-sulfur protein synthesis; performs scaffolding function during Fe/S cluster assembly; involved in Fe-S cluster assembly for both mitochondrial and cytosolic proteins; protein abundance increases under DNA replication stress; ISU2 has a paralog, ISU1, that arose from the whole genome duplication; isu1 isu2 double mutant is inviable; human homolog ISCU implic…			Predicted cytoskeleton protein involved in intracellular signaling; based on quantitative analysis of protein-protein interaction maps; may interact with ribosomes, based on co-purification studies; contains fibronectin type III domain fold
YLR382C	NAM2	17.7347	11.2087	-6.52591	0.000385444	0.0113083	-12.3818	-9.50735	2.87449	0.0931309	0.259699						X				X	LARS2	LARS2,MARS2	Mitochondrial leucyl-tRNA synthetase; also has direct role in splicing of several mitochondrial group I introns; indirectly required for mitochondrial genome maintenance; human homolog LARS2 can complement yeast null mutant, and is implicated in Perrault syndrome		CNN1,CNN2,CNN3,TAGLN,TAGLN2,TAGLN3	Component of yeast cortical actin cytoskeleton; binds and cross links actin filaments; originally identified by its homology to calponin (contains a calponin-like repeat) but the Scp1p domain structure is more similar to transgelin
YDR493W	MZM1	2.09732	2.23407	0.136757	0.261007	0.395025	-0.638009	0.0986225	0.736632	0.00064	0.0161565						X				X	LYRM7	LYRM7	Protein required for assembly of the cytochrome bc(1) complex; acts as a chaperone for Rip1p and facilitates its insertion into the complex at a late stage of assembly; localized to the mitochondrial matrix; null mutant exhibits a respiratory growth defect and reduced mitochondrial zinc levels, which is characteristic of mutations affecting bc(1) complex assembly; member of the LYR protein family…		IKBKAP	Subunit of Elongator complex; Elongator is required for modification of wobble nucleosides in tRNA; maintains structural integrity of Elongator; homolog of human IKAP, mutations in which cause familial dysautonomia (FD)
YNR031C	SSK2	1.72435	0.990304	-0.734045	0.141363	0.299262	-1.5761	0.208581	1.78468	0.000726536	0.016595											MAP3K4	MAP3K4	MAP kinase kinase kinase of HOG1 mitogen-activated signaling pathway; interacts with Ssk1p, leading to autophosphorylation and activation of Ssk2p which phosphorylates Pbs2p; also mediates actin cytoskeleton recovery from osmotic stress; a HOG-independent function of Ssk2p mediates the calcium-sensitive phenotype of the ptp2 msg5 double disruptant; SSK2 has a paralog, SSK22, that arose from the w…		PRELID1,PRELID2,PRELID3A,PRELID3B	Mitochondrial protein of unknown function; similar to Ups1p and Ups2p which are involved in regulation of mitochondrial cardiolipin and phosphatidylethanolamine levels; null is viable but interacts synthetically with ups1 and ups2 mutations; UPS3 has a paralog, UPS2, that arose from the whole genome duplication
YMR167W	MLH1	3.03822	3.24774	0.20952	0.284532	0.412386	-2.13389	-0.924907	1.20898	0.000251871	0.00847507	X								X	X	MLH1	MLH1,MLH3	Protein required for mismatch repair in mitosis and meiosis; also required for crossing over during meiosis; forms a complex with Pms1p and Msh2p-Msh3p during mismatch repair; human homolog is associated with hereditary non-polyposis colon cancer		FBXO18	DNA helicase and DNA-dependent ATPase; role in DNA repair and checkpoint recovery, in the proper timing of commitment to meiotic recombination and the Meiosis I to II transition; blocks trinucleotide repeat expansion; affects genome stability; disassembles Rad51p nucleoprotein filaments during meiotic recombination; stimulates Mus81p-Mms4p endonuclease activity independent of catalytic activity; …
YPL023C	MET12	0.930374	2.49302	1.56265	0.100653	0.248859	1.2508	-7.85493	-9.10573	2.8863e-07	3.36183e-05						X					MTHFR	MTHFR	Protein with MTHFR activity in vitro; null mutant has no phenotype and is prototrophic for methionine; MET13 encodes major isozyme of methylenetetrahydrofolate reductase (MTHFR)
YML120C	NDI1	0.394764	0.56347	0.168707	0.442072	0.500977	0.390632	2.25285	1.86222	5.53966e-05	0.00276125						X				X	MT-ND4		NADH:ubiquinone oxidoreductase; transfers electrons from NADH to ubiquinone in respiratory chain but does not pump protons, in contrast to higher eukaryotic multisubunit respiratory complex I; upon apoptotic stress, is activated in mitochondria by N-terminal cleavage, then translocates to cytoplasm to induce apoptosis; homolog of human AIFM2; yeast NDI1 complements several phenotypes of human cel…		TMEM208	Protein involved in SRP-independent targeting of substrates to the ER; component of an alternative ER targeting pathway that has partial functional redundancy with the GET pathway; preference for substrates with downstream transmembrane domains; interacts with Snd1p, Pho88p/Snd3p, and Sec61p-translocon subunits; can compensate for loss of SRP; role in the late endosome-vacuole interface; putative…
YER061C	CEM1	10.156	4.76202	-5.39395	0.00421011	0.0417345	-9.70315	-6.78668	2.91647	0.0299116	0.143782										X	OXSM	FASN,OXSM	Mitochondrial beta-keto-acyl synthase; possible role in fatty acid synthesis; required for mitochondrial respiration; human homolog OXSM can complement yeast cem1 null mutant		GRAMD1A,GRAMD1B,GRAMD1C,GRAMD2,GRAMD3	Sterol-binding protein that localizes to puncta in the cortical ER; sterol binding occurs via two StART-like domains; one of six StART-like domain-containing proteins in yeast that may be involved in intracellular sterol transfer between membranes; conserved across eukaryotes; has both GRAM and StART-like (VASt) domains; the authentic, non-tagged protein is detected in highly purified mitochondri…
YKL001C	MET14	0.590624	0.456513	-0.134111	0.511489	0.531215	-1.58311	-0.529943	1.05317	0.00201581	0.0319612						X					PAPSS2	PAPSS1,PAPSS2	Adenylylsulfate kinase; required for sulfate assimilation and involved in methionine metabolism; human homolog PAPSS2 complements yeast null mutant		XPC	Protein that recognizes and binds damaged DNA (with Rad23p) during NER; subunit of Nuclear Excision Repair Factor 2 (NEF2); also involved, with Rad23p, in turnover of ubiquitylated proteins; Rad4p-Rad23p heterodimer binds to promoters of DNA damage response genes to repress their transcription in the absence of DNA damage; NER stands for nucleotide excision repair
YGR101W	PCP1	16.6387	10.6441	-5.9946	0.00299695	0.0352414	-14.0908	-14.1077	-0.0169267	0.487862	0.548819										X	PARL	PARL,RHBDL1,RHBDL2,RHBDL3	Mitochondrial serine protease; required for the processing of various mitochondrial proteins and maintenance of mitochondrial DNA and morphology; belongs to the rhomboid-GlpG superfamily of intramembrane peptidases			Mitochondrial ribosomal protein of the large subunit
YDR419W	RAD30	-0.326615	-0.517569	-0.190955	0.874979	0.649967	2.20894	0.8149	-1.39404	8.35301e-05	0.00371998	X			X	X					X	POLH	POLH	DNA polymerase eta; involved in translesion synthesis during post-replication repair; catalyzes the synthesis of DNA opposite cyclobutane pyrimidine dimers and other lesions; involved in formation of post-replicative damage-induced genome-wide cohesion; may also have a role in protection against mitochondrial mutagenesis; mutations in human pol eta are responsible for XPV		GPD2	Mitochondrial glycerol-3-phosphate dehydrogenase; expression is repressed by both glucose and cAMP and derepressed by non-fermentable carbon sources in a Snf1p, Rsf1p, Hap2/3/4/5 complex dependent manner
YJR074W	MOG1	-0.229349	0.861077	1.09043	0.0016138	0.0254743	2.11319	1.9613	-0.151897	0.745502	0.640707											RANGRF	RANGRF	Conserved nuclear protein that interacts with GTP-Gsp1p; stimulates nucleotide release from Gsp1p; involved in nuclear protein import; nucleotide release is inhibited by Yrb1p		BIVM-ERCC5,ERCC5	Single-stranded DNA endonuclease; cleaves single-stranded DNA during nucleotide excision repair to excise damaged DNA; subunit of Nucleotide Excision Repair Factor 3 (NEF3); homolog of human XPG protein
YHR091C	MSR1	12.9994	8.76346	-4.23591	7.59187e-05	0.00432363	-3.28319	-1.40709	1.87609	0.00717637	0.0664241										X	RARS2	RARS,RARS2	Mitochondrial arginyl-tRNA synthetase; mutations in human ortholog are associated with pontocerebellar hypoplasia type 6; MSR1 has a paralog, YDR341C, that arose from the whole genome duplication		YY1,YY2,ZFP42	Transcriptional repressor; recruits the Cyc8p-Tup1p complex to promoters; mediates glucose repression and negatively regulates a variety of processes including filamentous growth and alkaline pH response; activated in stochastic pulses of nuclear localization in response to low glucose
YPR138C	MEP3	-9.04933	-1.35729	7.69204	0.000205766	0.00848208	-7.62953	-8.025	-0.395467	0.947554	0.695139						X					RHAG, RHCG		Ammonium permease of high capacity and low affinity; belongs to Mep-Amt-Rh family of well-conserved ammonium (NH4+) transporters that includes the human Rh factors; expression is under the nitrogen catabolite repression regulation ammonia permease activity regulated by TORC1 effectors, Npr1p and Par32p; MEP3 has a paralog, MEP1, that arose from the whole genome duplication
YPL241C	CIN2	0.475407	-0.182126	-0.657533	0.00509458	0.0468264	-0.22713	-0.460196	-0.233065	0.390974	0.504692						X					RP2	TBCC	GTPase-activating protein (GAP) for Cin4p; tubulin folding factor C involved in beta-tubulin (Tub2p) folding; mutants display increased chromosome loss and benomyl sensitivity; human homolog RP2 complements yeast null mutant
YHR067W	HTD2	10.0785	6.98854	-3.09	0.00150427	0.0245952	-4.85721	-3.30538	1.55183	0.2878	0.440024						X				X	RPP14		Mitochondrial 3-hydroxyacyl-thioester dehydratase; involved in fatty acid biosynthesis, required for respiratory growth and for normal mitochondrial morphology		SRSF1,SRSF4,SRSF5,SRSF6,SRSF7,SRSF9	RNA-binding protein; promotes elongation, regulates termination, and carries poly(A) mRNA from nucleus to cytoplasm; represses translation initiation by binding eIF4G; required for pre-mRNA splicing; interacts with E3 ubiquitin ligase Bre1p, linking histone ubiquitination to mRNA processing; may have role in telomere maintenance; dissociation from mRNAs promoted by Mtr10p; phosphorylated by Sky1p…
YHR008C	SOD2	12.617	9.2609	-3.35611	0.000848881	0.017122	-7.08861	-4.59822	2.49039	0.00980831	0.0796329										X	SOD1, SOD2	SOD2	Mitochondrial manganese superoxide dismutase; protects cells against oxygen toxicity and oxidative stress; human mitochondrial SOD2 can complement a yeast null mutant and human cytoplasmic SOD1 can also complement when targeted to the mitochondrial matrix			Protein of unknown function; contains transmembrane domains; involved in secretion of proteins that lack classical secretory signal sequences; component of the detergent-insoluble glycolipid-enriched complexes (DIGs); NCE102 has a paralog, FHN1, that arose from the whole genome duplication
YMR216C	SKY1	-2.38257	0.182939	2.56551	0.00501229	0.0466608	-4.31752	-5.73006	-1.41253	0.321066	0.462501											SRPK1	SRPK1,SRPK2,SRPK3	SR protein kinase (SRPK); involved in regulating proteins involved in mRNA metabolism and cation homeostasis; similar to human SRPK1		ATRX,EP400,EP400NL,SRCAP	Swi2/Snf2-related ATPase; structural component of the SWR1 complex, which exchanges histone variant H2AZ (Htz1p) for chromatin-bound histone H2A; relocalizes to the cytosol in response to hypoxia; chronological aging factor that mediates lifespan extension by dietary restriction
YGL087C	MMS2	1.11288	0.564368	-0.548511	0.624975	0.571762	1.91044	0.258434	-1.65201	6.26011e-05	0.00305772	X			X	X		X	X			UBE2V1, UBE2V2	UBE2V1,UBE2V2	Ubiquitin-conjugating enzyme variant; involved in error-free postreplication repair; forms a heteromeric complex with Ubc13p, an active ubiquitin-conjugating enzyme; cooperates with chromatin-associated RING finger proteins, Rad18p and Rad5p; protein abundance increases in response to DNA replication stress	RANGRF	RANGRF	Conserved nuclear protein that interacts with GTP-Gsp1p; stimulates nucleotide release from Gsp1p; involved in nuclear protein import; nucleotide release is inhibited by Yrb1p
YFR010W	UBP6	-1.32282	-1.78071	-0.457884	0.721752	0.600765	-1.23642	-4.38073	-3.14431	0.000255647	0.00850758											USP14	USP14	Ubiquitin-specific protease; situated in the base subcomplex of the 26S proteasome, releases free ubiquitin from branched polyubiquitin chains en bloc, rather than from the distal tip of the chain; negatively regulates degradation of ubiquitinated proteins by the proteasome; works in opposition to Hul5p polyubiquitin elongation activity; mutant has aneuploidy tolerance; human homolog UBP14 comple…	PAPSS2	PAPSS1,PAPSS2	Adenylylsulfate kinase; required for sulfate assimilation and involved in methionine metabolism; human homolog PAPSS2 complements yeast null mutant
YOL075C	YOL075C	-2.36197	-1.37193	0.990032	0.00272735	0.0338768	0.887279	-0.214756	-1.10204	0.0293153	0.143428												ABCG1,ABCG4,ABCG8	Putative ABC transporter		VPS25	Component of the ESCRT-II complex; ESCRT-II is involved in ubiquitin-dependent sorting of proteins into the endosome
YJL200C	ACO2	0.0401737	1.24097	1.2008	0.00144031	0.0241814	-1.13073	-0.0442848	1.08644	0.00066695	0.0163765										X		ACO1,ACO2,IREB2	Putative mitochondrial aconitase isozyme; similarity to Aco1p, an aconitase required for the TCA cycle; expression induced during growth on glucose, by amino acid starvation via Gcn4p, and repressed on ethanol		PUM3	Pumilio-homology domain protein; binds the 3' UTR of ASH1 mRNA and represses its translation, resulting in proper asymmetric localization of ASH1 mRNA; required at post-transcriptional step for efficient retrotransposition; absence results in decreased Ty1 Gag:GFP protein levels; co-sediments with the 60S ribosomal subunit and is required for its biogenesis
YPL109C	MCO76	1.8544	0.862166	-0.992233	0.00523538	0.0479688	0.917886	1.17299	0.255102	0.124239	0.299066										X		ADCK2
YOR323C	PRO2	0.619291	0.0909604	-0.528331	0.0236058	0.114949	-0.657469	0.222127	0.879596	0.00152963	0.0270892						X						ALDH18A1	Gamma-glutamyl phosphate reductase; catalyzes the second step in proline biosynthesis
YBR280C	SAF1	-1.08937	-1.02335	0.0660168	0.266042	0.398924	2.1966	1.5516	-0.644994	0.00349254	0.0442508												ALS2	F-Box protein involved in proteasome-dependent degradation of Aah1p; involved in proteasome-dependent degradation of Aah1p during entry of cells into quiescence; interacts with Skp1		MAPRE1,MAPRE2,MAPRE3	Microtubule plus end-tracking protein; together with Kar9p makes up the cortical microtubule capture site and delays the exit from mitosis when the spindle is oriented abnormally; homolog of human end binding protein 1 (EB1)
YAL021C	CCR4	-8.14782	4.17831	12.3261	7.09129e-06	0.000735592	-9.85597	-12.4709	-2.61493	0.00621818	0.0621712					X							ANGEL2,CNOT6,CNOT6L,NOCT	Component of the CCR4-NOT transcriptional complex; CCR4-NOT is involved in regulation of gene expression; component of the major cytoplasmic deadenylase, which is involved in mRNA poly(A) tail shortening		TADA2A,TADA2B	Transcription coactivator; component of the ADA and SAGA transcriptional adaptor/HAT (histone acetyltransferase) complexes
YGR232W	NAS6	0.916134	0.118829	-0.797306	0.00393254	0.0405037	0.853583	1.2524	0.398819	0.399335	0.510251												ANKRD1,ANKRD2,ANKRD23,ANKRD54,ASB8,PSMD10	Evolutionarily conserved 19S regulatory particle assembly-chaperone; proteasome-interacting protein involved in the assembly of the base subcomplex of the 19S proteasomal regulatory particle (RP); ortholog of human oncoprotein gankyrin, also known as p28, which interacts with the Rb tumor suppressor and CDK4/6	RARS2	RARS,RARS2	Mitochondrial arginyl-tRNA synthetase; mutations in human ortholog are associated with pontocerebellar hypoplasia type 6; MSR1 has a paralog, YDR341C, that arose from the whole genome duplication
YIL137C	TMA108	3.10588	0.740842	-2.36504	0.000677082	0.0151462	-0.817174	0.639244	1.45642	0.00935912	0.0769807								X				ANPEP,C9orf3,ENPEP,ERAP1,ERAP2,LNPEP,LVRN,TRHDE	Ribosome-associated, nascent chain binding factor; binds N-terminal region of nascent peptides during translation; recognizes target proteins via its putative metallopeptidase peptide-binding pocket			Protein with a role in 5'-end processing of mitochondrial RNAs; located in the mitochondrial membrane
YBL019W	APN2	9.89853	6.56996	-3.32857	0.00194806	0.0280998	-2.37984	0.181866	2.56171	5.16767e-05	0.00265247	X											APEX1,APEX2	Class II abasic (AP) endonuclease involved in repair of DNA damage; homolog of human HAP1 and E. coli exoIII		LIPT1	Putative lipoate-protein ligase; required along with Lip2 and Lip5 for lipoylation of Lat1p and Kgd2p; similar to E. coli LplA; null mutant displays reduced frequency of mitochondrial genome loss
YPR192W	AQY1	-0.448587	-2.16775	-1.71917	5.01483e-05	0.00357979	2.98063	4.24399	1.26336	0.000162584	0.00623244												AQP1,AQP2,AQP4,AQP5,AQP6,AQP8,MIP	Spore-specific water channel; mediates the transport of water across cell membranes, developmentally controlled; may play a role in spore maturation, probably by allowing water outflow, may be involved in freeze tolerance		IFT27,RAB17,RAB33A,RAB33B,RAB5A,RAB5B,RAB5C	Rab family GTP-binding protein; contains the PEST signal sequence specific for proteolytic enzymes; may be involved in vesicular transport; overexpression leads to accumulation of Golgi-like cisternae with budding vesicles
YDR389W	SAC7	1.8176	4.14191	2.32431	0.0156277	0.0915793	-2.913	-5.72607	-2.81307	3.12865e-09	7.89555e-07						X						ARHGAP22,ARHGAP24,ARHGAP25,ARHGAP29,ARHGAP40,GMIP,HMHA1	GTPase activating protein (GAP) for Rho1p; regulator of a Tor2p-mediated, Rho1p GTPase switch that controls organization of the actin cytoskeleton; negative regulator of the RHO1-PKC1-MAPK cell integrity (CWI) and membrane fluidity homeostasis signaling pathways; potential Cdc28p substrate; SAC7 has a paralog, BAG7, that arose from the whole genome duplication			Plasma membrane G protein coupled receptor (GPCR); interacts with the heterotrimeric G protein alpha subunit, Gpa2p, and with Plc1p; sensor that integrates nutritional signals with the modulation of cell fate via PKA and cAMP synthesis
YMR138W	CIN4	11.8861	7.8303	-4.05576	0.00449125	0.0430085	-1.09108	-0.233134	0.857948	0.0672768	0.221214												ARL15,ARL2	GTP-binding protein involved in beta-tubulin (Tub2p) folding; isolated as mutant with increased chromosome loss and sensitivity to benomyl; regulated by the GTPase-activating protein, Cin2p, the human retinitis pigmentosa 2 (RP2) homolog		MED31	Subunit of the RNA polymerase II mediator complex; associates with core polymerase subunits to form the RNA polymerase II holoenzyme; involved in telomere maintenance; conserved with other metazoan MED31 subunits
YOR322C	LDB19	10.2249	7.1445	-3.08041	0.00321917	0.0365236	-2.74598	-1.00588	1.7401	0.102699	0.272661												ARRDC1,ARRDC2,ARRDC3,ARRDC4,ARRDC5,TXNIP	Alpha-arrestin involved in ubiquitin-dependent endocytosis; regulates endocytosis of plasma membrane proteins by recruiting the ubiquitin ligase Rsp5p to its targets; involved in the basal internalization and turnover of alpha-factor receptor Ste2p; recruits ubiquitin ligase Rsp5p to Ste2p via its 2 PPXY motifs; inhibited by Npr1p-mediated phosphorylation, which affects translocation between the …
YML096W	YML096W	0.279845	-0.711007	-0.990852	0.0398726	0.151188	-0.256191	-2.44778	-2.19159	0.000464234	0.0131389												ASNSD1				Subunit of the Slx5-Slx8 SUMO-targeted Ub ligase (STUbL) complex; role in Ub-mediated degradation of histone variant Cse4p preventing mislocalization to euchromatin; role in proteolysis of spindle positioning protein Kar9p, and DNA repair proteins Rad52p and Rad57p; forms SUMO-dependent nuclear foci, including DNA repair centers; contains a RING domain and two SIM motifs; associates with the cent…
YDL056W	MBP1	17.1639	10.62	-6.54396	0.00186099	0.0272992	-12.424	-7.81777	4.60623	0.000390699	0.0114871						X						ASPG	Transcription factor; involved in regulation of cell cycle progression from G1 to S phase, forms a complex with Swi6p that binds to MluI cell cycle box regulatory element in promoters of DNA synthesis genes		ARL15,ARL2	GTP-binding protein involved in beta-tubulin (Tub2p) folding; isolated as mutant with increased chromosome loss and sensitivity to benomyl; regulated by the GTPase-activating protein, Cin2p, the human retinitis pigmentosa 2 (RP2) homolog
YIL036W	CST6	-1.06896	0.0848408	1.1538	0.000169326	0.00751891	-2.00197	-1.7803	0.221673	0.240794	0.406584												ATF2,ATF7,CREB5,JUN,JUNB,JUND	Basic leucine zipper (bZIP) transcription factor from ATF/CREB family involved in stress-responsive regulatory network; mediates transcriptional activation of NCE103 in response to low CO2 levels; proposed to be a regulator of oleate responsive genes; involved in utilization of non-optimal carbon sources and chromosome stability; relocalizes to the cytosol in response to hypoxia; CST6 has a paral…			Constituent of the TIM23 complex; proposed alternatively to be a component of the import motor (PAM complex) or to interact with and modulate the core TIM23 (Translocase of the Inner mitochondrial Membrane) complex; protein abundance increases in response to DNA replication stress
YHR171W	ATG7	0.928312	-0.181234	-1.10955	0.00381387	0.0397376	0.706332	1.48062	0.774283	0.108138	0.278234							X			X		ATG7	Autophagy-related protein and dual specificity member of the E1 family; mediates the attachment of Atg12p to Atg5p and Atg8p to phosphatidylethanolamine which are required steps in autophagosome formation; E1 enzymes are also known as ubiquitin-activating enzymes; involved in methionine restriction extension of chronological lifespan in an autophagy-dependent manner		PEMT	Methylene-fatty-acyl-phospholipid synthase; catalyzes the last two steps in phosphatidylcholine biosynthesis; also known as phospholipid methyltransferase
YKL016C	ATP7	17.3285	9.71971	-7.6088	0.000693893	0.0153119	-13.0955	-10.1128	2.98267	0.0135561	0.0963667					X					X		ATP5H	Subunit d of the stator stalk of mitochondrial F1F0 ATP synthase; F1F0 ATP synthase is a large, evolutionarily conserved enzyme complex required for ATP synthesis		RAD50	Subunit of MRX complex with Mre11p and Xrs2p; complex is involved in processing double-strand DNA breaks in vegetative cells, initiation of meiotic DSBs, telomere maintenance, and nonhomologous end joining; forms nuclear foci upon DNA replication stress
YDR298C	ATP5	14.2315	9.42687	-4.80468	0.00868773	0.0653716	-9.27093	-5.21209	4.05884	0.00163707	0.0280093										X		ATP5O	Subunit 5 of the stator stalk of mitochondrial F1F0 ATP synthase; F1F0 ATP synthase is a large, evolutionarily conserved enzyme complex required for ATP synthesis; homologous to bovine subunit OSCP (oligomycin sensitivity-conferring protein); phosphorylated			CDK inhibitor and nuclear anchor; during the cell cycle Far1p sequesters the GEF Cdc24p in the nucleus; phosphorylation by Cdc28p-Cln results in SCFCdc4 complex-mediated ubiquitin-dependent degradation, releasing Cdc24p for export and activation of GTPase Cdc42p; in response to pheromone, phosphorylation of Far1p by MAPK Fus3p results in association with, and inhibition of Cdc28p-Cln, as well as …
YOR332W	VMA4	-2.26357	-2.56166	-0.298084	0.619466	0.569378	4.08958	2.93346	-1.15611	0.00103927	0.0203051						X						ATP6V1E1,ATP6V1E2	Subunit E of the V1 domain of the vacuolar H+-ATPase (V-ATPase); V-ATPase is an electrogenic proton pump found throughout the endomembrane system; V1 domain has eight subunits; required for the V1 domain to assemble onto the vacuolar membrane; protein abundance increases in response to DNA replication stress
YPR036W	VMA13	1.71141	0.314238	-1.39717	0.00107766	0.0201938	2.48699	2.99591	0.508916	0.19545	0.369702												ATP6V1H	Subunit H of the V1 peripheral membrane domain of V-ATPase; part of the electrogenic proton pump found throughout the endomembrane system; serves as an activator or a structural stabilizer of the V-ATPase; the V1 peripheral membrane domain of the vacuolar H+-ATPase (V-ATPase) has eight subunits		ASNSD1
YNL315C	ATP11	12.731	9.56063	-3.17038	0.00210778	0.0291525	-5.62802	-4.48661	1.14141	0.013866	0.0974275								X		X		ATPAF1	Molecular chaperone; required for the assembly of alpha and beta subunits into the F1 sector of mitochondrial F1F0 ATP synthase; N-terminally propionylated in vivo	USP14	USP14	Ubiquitin-specific protease; situated in the base subcomplex of the 26S proteasome, releases free ubiquitin from branched polyubiquitin chains en bloc, rather than from the distal tip of the chain; negatively regulates degradation of ubiquitinated proteins by the proteasome; works in opposition to Hul5p polyubiquitin elongation activity; mutant has aneuploidy tolerance; human homolog UBP14 comple…
YDR334W	SWR1	3.00705	1.33598	-1.67107	0.0029239	0.0349483	-2.789	-2.88016	-0.0911585	0.452533	0.535423	X				X	X						ATRX,EP400,EP400NL,SRCAP	Swi2/Snf2-related ATPase; structural component of the SWR1 complex, which exchanges histone variant H2AZ (Htz1p) for chromatin-bound histone H2A; relocalizes to the cytosol in response to hypoxia; chronological aging factor that mediates lifespan extension by dietary restriction	CAMLG, WRB	WRB	Subunit of the GET complex; involved in insertion of proteins into the ER membrane; required for the retrieval of HDEL proteins from the Golgi to the ER in an ERD2 dependent fashion and for normal mitochondrial morphology and inheritance
YGL163C	RAD54	-1.20352	4.1163	5.31982	3.31216e-07	7.40012e-05	-0.961767	-5.33518	-4.37341	3.45778e-07	3.87829e-05					X	X			X			ATRX,RAD54B,RAD54L,RAD54L2	DNA-dependent ATPase that stimulates strand exchange; modifies the topology of double-stranded DNA; involved in the recombinational repair of double-strand breaks in DNA during vegetative growth and meiosis; member of the SWI/SNF family of DNA translocases; forms nuclear foci upon DNA replication stress		MRPS6	Mitochondrial ribosomal protein of the small subunit; MRP17 exhibits genetic interactions with PET122, encoding a COX3-specific translational activator
YIR039C	YPS6	0.480945	-0.618803	-1.09975	0.000126512	0.0061242	0.312959	0.509854	0.196895	0.558754	0.576015							X					BACE1,BACE2,CTSE,PGA3,PGA4,PGA5,PGC	Putative GPI-anchored aspartic protease; member of the yapsin family of proteases involved in cell wall growth and maintenance			Subunit of the RNA polymerase II mediator complex; associates with core polymerase subunits to form the RNA polymerase II holoenzyme; essential for basal and activated transcription; direct target of Cyc8p-Tup1p transcriptional corepressor
YLR399C	BDF1	-2.4079	-1.59663	0.811272	0.324527	0.436584	-6.8949	-9.76846	-2.87355	0.000932071	0.0188176	X											BAZ1A,BRD2,BRD3,BRD4,BRDT,CREBBP,EP300	Protein involved in transcription initiation; functions at TATA-containing promoters; associates with the basal transcription factor TFIID; contains two bromodomains; corresponds to the C-terminal region of mammalian TAF1; redundant with Bdf2p; BDF1 has a paralog, BDF2, that arose from the whole genome duplication			Nuclear protein putative transcription factor; required for growth of superficial pseudohyphae (which do not invade the agar substrate) but not for invasive pseudohyphal growth; may act together with Phd1p; potential Cdc28p substrate
YGR258C	RAD2	0.235916	1.99626	1.76034	0.0245529	0.117485	0.582565	-8.32153	-8.9041	1.60833e-10	8.11767e-08	X		X		X							BIVM-ERCC5,ERCC5	Single-stranded DNA endonuclease; cleaves single-stranded DNA during nucleotide excision repair to excise damaged DNA; subunit of Nucleotide Excision Repair Factor 3 (NEF3); homolog of human XPG protein		DDX46,TDRD12	Mitochondrial transcription elongation factor; DEAD-box protein; required for efficient splicing of mitochondrial Group I and II introns; non-polar RNA helicase that also facilities strand annealing; promotes RNA folding by stabilizing an early assembly intermediate
YOR026W	BUB3	-6.89739	-5.73365	1.16374	0.86333	0.646271	-4.42385	-7.72224	-3.29839	0.00287309	0.0402812						X						BUB3	Kinetochore checkpoint WD40 repeat protein; localizes to kinetochores during prophase and metaphase, delays anaphase in the presence of unattached kinetochores; forms complexes with Mad1p-Bub1p and with Cdc20p, binds Mad2p and Mad3p; functions at kinetochore to activate APC/C-Cdc20p for normal mitotic progression			SUMO-ligase and SUMO-targeted metalloprotease; involved in DNA repair; removes DNA-protein crosslinks at stalled replication forks during replication of damaged DNA; clears chromatin-bound sumoylated proteins; localizes to single spot on nuclear periphery of mother cells but not daughters; exhibits vacuolar localization upon genotoxic stress; activated by DNA binding; member of minigluzincins pro…
YOL032W	OPI10	16.1893	5.84477	-10.3446	0.000104954	0.00547222	-16.9496	-10.8265	6.1231	0.0202815	0.116575												C11orf73	Protein with a possible role in phospholipid biosynthesis; null mutant displays an inositol-excreting phenotype that is suppressed by exogenous choline; protein abundance increases in response to DNA replication stress		ATP6V1H	Subunit H of the V1 peripheral membrane domain of V-ATPase; part of the electrogenic proton pump found throughout the endomembrane system; serves as an activator or a structural stabilizer of the V-ATPase; the V1 peripheral membrane domain of the vacuolar H+-ATPase (V-ATPase) has eight subunits
YIL070C	MAM33	10.2169	7.42284	-2.79408	0.00509181	0.0468264	-2.00705	-1.02578	0.98127	0.025111	0.130438										X		C1QBP	Specific translational activator for the mitochondrial COX1 mRNA; acidic protein of the mitochondrial matrix; related to the human complement receptor gC1q-R	PARL	PARL,RHBDL1,RHBDL2,RHBDL3	Mitochondrial serine protease; required for the processing of various mitochondrial proteins and maintenance of mitochondrial DNA and morphology; belongs to the rhomboid-GlpG superfamily of intramembrane peptidases
YCR002C	CDC10	4.70799	1.61056	-3.09743	0.000698732	0.0153119	-2.00554	-0.869097	1.13645	0.0429387	0.177642						X						C9orf69,SEPT12,SEPT3,SEPT9	Component of the septin ring, required for cytokinesis; septins are GTP-binding proteins that assemble into rod-like hetero-oligomers that can associate to form filaments; septin rings at the mother-bud neck act as scaffolds for recruiting cell division factors and as barriers to prevent diffusion of specific proteins between mother and daughter cells; N-terminus interacts with phosphatidylinosit…		NCKIPSD	Protein involved in bud-site selection; Bud14p-Glc7p complex is a cortical regulator of dynein; forms a complex with Kel1p and Kel2p that regulates Bnr1p (formin) to affect actin cable assembly, cytokinesis, and polarized growth; diploid mutants display a random budding pattern instead of the wild-type bipolar pattern; relative distribution to the nucleus increases upon DNA replication stress
YDL101C	DUN1	7.02032	8.49828	1.47795	0.251425	0.38823	-0.707247	-2.45449	-1.74725	0.0010614	0.0205326	X				X	X						CAMK1,CAMK1D,CAMK1G,CAMKV,CHEK2,PNCK,PRKD1,PRKD2,PRKD3,PSKH1,PSKH2	Cell-cycle checkpoint S/T protein kinase; required for transient G2/M arrest after DNA damage, damage-induced transcription, and nuclear-to-cytoplasmic redistribution of Rnr2p-Rnr4p after genotoxic stress and iron deprivation; phosphorylates repair protein Rad55p, transcriptional repressor Sml1p, superoxide dismutase, and ribonucleotide reductase inhibitors Crt1p and Dif1p; functions in the Mec1p…	COQ4	COQ4	Protein with a role in ubiquinone (Coenzyme Q) biosynthesis; possibly functioning in stabilization of Coq7p; located on matrix face of mitochondrial inner membrane; component of a mitochondrial ubiquinone-synthesizing complex; human homolog COQ4 can complement yeast coq4 null mutant
YDR256C	CTA1	3.12152	1.34708	-1.77443	0.000148477	0.00698094	2.26211	2.59851	0.336401	0.290187	0.440716										X		CAT	Catalase A; breaks down hydrogen peroxide in the peroxisomal matrix formed by acyl-CoA oxidase (Pox1p) during fatty acid beta-oxidation			EH domain-containing protein involved in endocytosis; actin cytoskeletal organization and cell wall morphogenesis; forms a complex with Sla1p and Pan1p
YJL148W	RPA34	-1.40232	-2.22244	-0.820126	0.286971	0.414061	-0.907748	-2.41828	-1.51054	0.000633555	0.0161565							X					CD3EAP	RNA polymerase I subunit A34.5; essential for nucleolar assembly and for high polymerase loading rate; nucleolar localization depends on Rpa49p		ILKAP,PPM1D,PPM1E,PPM1F,PPM1K,PPM1N	Type 2C protein phosphatase (PP2C); dephosphorylates Hog1p, inactivating osmosensing MAPK cascade; involved in Fus3p activation during pheromone response; deletion affects precursor tRNA splicing, mitochondrial inheritance, and sporulation
YDR254W	CHL4	-1.13017	-0.435916	0.694253	0.205724	0.351278	-0.538862	-1.31361	-0.774746	0.000603969	0.0160441							X					CENPN,RUNX1-IT1	Outer kinetochore protein required for chromosome stability; involved in new kinetochore assembly and sister chromatid cohesion; forms a stable complex with Iml3p; peripheral component of the Ctf19 kinetochore complex that interacts with Ctf19p, Ctf3p, and Mif2p; required for the spindle assembly checkpoint; orthologous to human centromere constitutive-associated network (CCAN) subunit CENP-N and…		ELP6	Subunit of hexameric RecA-like ATPase Elp456 Elongator subcomplex; which is required for modification of wobble nucleosides in tRNA; required for Elongator structural integrity
YPL174C	NIP100	15.7828	10.6877	-5.09505	0.000621668	0.0147128	-6.89889	-4.11452	2.78437	0.00140085	0.025341					X							CEP350,CLIP1,CLIP2,CLIP3,CLIP4,DCTN1	Large subunit of the dynactin complex; dynactin is involved in partitioning the mitotic spindle between mother and daughter cells; putative ortholog of mammalian p150(glued)
YLR260W	LCB5	15.8097	9.57453	-6.23519	1.67926e-06	0.000256706	-10.4027	-9.46601	0.93669	0.0602556	0.209742												CERK,CERKL,SPHK1,SPHK2	Minor sphingoid long-chain base kinase; possibly involved in synthesis of long-chain base phosphates, which function as signaling molecules; LCB5 has a paralog, LCB4, that arose from the whole genome duplication
YHR116W	COX23	13.2952	9.18178	-4.11338	0.000740193	0.0156926	-3.77957	-2.56757	1.212	0.219556	0.388885										X		CHCHD7	Protein that functions in mitochondrial copper homeostasis; mitochondrial intermembrane space protein; essential for functional cytochrome oxidase expression; homologous to Cox17p; contains twin cysteine-x9-cysteine motifs			RNA polymerase I termination factor; binds to rDNA terminator element, required for efficient Pol I termination; required for rDNA silencing at NTS1; facilities association of Sir2p with NTS1, contributes to rDNA stability and cell longevity; interacts physically with Fob1p and RENT subunits, Sir2p and Net1p; may interact with ribosomes, based on co-purification experiments; Myb-like DNA-binding …
YLR025W	SNF7	-0.999488	0.740622	1.74011	0.0833027	0.226547	2.57412	0.672633	-1.90149	1.38162e-05	0.000929783												CHMP4A,CHMP4B,CHMP4BP1,CHMP4C,CHMP7	One of four subunits of the ESCRT-III complex; involved in the sorting of transmembrane proteins into the multivesicular body (MVB) pathway; recruited from the cytoplasm to endosomal membranes; ESCRT-III stands for endosomal sorting complex required for transport III		RPS3A	Ribosomal protein of the small (40S) subunit; homologous to mammalian ribosomal protein S3A, no bacterial homolog; RPS1B has a paralog, RPS1A, that arose from the whole genome duplication
YNL148C	ALF1	-0.283306	2.20969	2.493	0.0015073	0.0245952	-2.1142	-0.992585	1.12162	0.10769	0.277553												CLIP3,CLIP4,DCTN1,TBCB	Alpha-tubulin folding protein; similar to mammalian cofactor B; Alf1p-GFP localizes to cytoplasmic microtubules; required for the folding of alpha-tubulin and may play an additional role in microtubule maintenance			Component of the Trk1p-Trk2p potassium transport system; 180 kDa high affinity potassium transporter; phosphorylated in vivo and interacts physically with the phosphatase Ppz1p, suggesting Trk1p acitivy is regulated by phosphorylation; TRK1 has a paralog, TRK2, that arose from the whole genome duplication
YAL049C	AIM2	0.430943	1.47569	1.04474	0.00149572	0.0245952	-0.254775	-0.37308	-0.118305	0.922184	0.690549												CMBL	Cytoplasmic protein involved in mitochondrial function or organization; null mutant displays reduced frequency of mitochondrial genome loss; potential Hsp82p interactor			Arf3p polarization-specific docking factor; required for the polarized distribution of the ADP-ribosylation factor, Arf3p; participates in polarity development and maintenance of a normal haploid budding pattern; interacts with Cnm7p
YOR367W	SCP1	13.2943	10.5755	-2.71884	0.00402447	0.0412065	-3.79093	-2.99217	0.798752	0.696053	0.625849								X				CNN1,CNN2,CNN3,TAGLN,TAGLN2,TAGLN3	Component of yeast cortical actin cytoskeleton; binds and cross links actin filaments; originally identified by its homology to calponin (contains a calponin-like repeat) but the Scp1p domain structure is more similar to transgelin
YER068W	MOT2	15.4484	5.48225	-9.96617	0.00536198	0.0483743	-21.9459	-24.7494	-2.80349	0.342614	0.475072					X							CNOT4	Ubiquitin-protein ligase subunit of the CCR4-NOT complex; with Ubc4p, ubiquitinates nascent polypeptide-associated complex subunits and histone demethyase Jhd2p; CCR4-NOT has roles in transcription regulation, mRNA degradation, and post-transcriptional modifications; regulates levels of DNA Polymerase-{alpha} to promote efficient and accurate DNA replication		ARRDC1,ARRDC2,ARRDC3,ARRDC4,ARRDC5,TXNIP	Alpha-arrestin involved in ubiquitin-dependent endocytosis; regulates endocytosis of plasma membrane proteins by recruiting the ubiquitin ligase Rsp5p to its targets; involved in the basal internalization and turnover of alpha-factor receptor Ste2p; recruits ubiquitin ligase Rsp5p to Ste2p via its 2 PPXY motifs; inhibited by Npr1p-mediated phosphorylation, which affects translocation between the …
YNR052C	POP2	-8.75919	-0.522075	8.23711	5.5705e-07	0.000106986	-10.1497	-13.6279	-3.47822	0.0217483	0.120454					X							CNOT7,CNOT8	RNase of the DEDD superfamily; subunit of the Ccr4-Not complex that mediates 3' to 5' mRNA deadenylation	CTPS1, CTPS2	CTPS1,CTPS2	Minor CTP synthase isozyme (see also URA7); catalyzes the ATP-dependent transfer of the amide nitrogen from glutamine to UTP, forming CTP, the final step in de novo biosynthesis of pyrimidines; involved in phospholipid biosynthesis; capable of forming cytoplasmic filaments termed cytoophidium, especially during conditions of glucose depletion; URA8 has a paralog, URA7, that arose from the whole g…
YLR218C	COA4	10.3626	8.39117	-1.97144	0.000424744	0.0118419	-3.41401	-2.3147	1.09931	0.000820359	0.0177087										X		COA4	Twin Cx(9)C protein involved in cytochrome c oxidase organization; organization includes assembly or stability; localizes to the mitochondrial intermembrane space via the Mia40p-Erv1p system; interacts genetically with CYC1 and with cytochrome c oxidase assembly factors		MRPS7	Mitochondrial ribosomal protein of the small subunit; has similarity to E. coli S7 ribosomal protein
YER175C	TMT1	1.6143	-0.12248	-1.73678	0.00134124	0.0231882	0.615984	2.29186	1.67588	7.04835e-07	6.88545e-05												COQ3,WBSCR27	Trans-aconitate methyltransferase; cytosolic enzyme that catalyzes the methyl esterification of 3-isopropylmalate, an intermediate of the leucine biosynthetic pathway, and trans-aconitate, which inhibits the citric acid cycle		FBXO16,FBXW12,WDR48,WDR49,WDR54,WDR86	Peripheral protein of cytosolic face of mitochondrial outer membrane; required for mitochondrial fission; interacts with Fis1p and with the self-assembled oligomeric form of the dynamin-related GTPase Dnm1p; contains WD repeats; MDV1 has a paralog, CAF4, that arose from the whole genome duplication
YHR051W	COX6	14.7373	10.5045	-4.23284	0.00414009	0.0414123	-6.532	-7.74662	-1.21462	0.949516	0.695404										X		COX5A	Subunit VI of cytochrome c oxidase (Complex IV); Complex IV is the terminal member of the mitochondrial inner membrane electron transport chain; expression is regulated by oxygen levels			Protein that exhibits physical and genetic interactions with Rpb8p; Rpb8p is a subunit of RNA polymerases I, II, and III; computational analysis of large-scale protein-protein interaction data suggests a role in chromosome segregation
YDL142C	CRD1	3.37128	5.26561	1.89432	0.00351085	0.037896	0.967196	0.384041	-0.583155	0.120173	0.296599										X		CRLS1	Cardiolipin synthase; produces cardiolipin, which is a phospholipid of the mitochondrial inner membrane that is required for normal mitochondrial membrane potential and function and for correct integration of membrane-multispanning proteins into the mitochondrial outer membrane; required to maintain tubular mitochondrial morphology and functions in mitochondrial fusion; also required for normal v…		PMPCB,UQCRC1,UQCRC2	Core subunit of the ubiquinol-cytochrome c reductase complex; the ubiquinol-cytochrome c reductase complex (bc1 complex) is a component of the mitochondrial inner membrane electron transport chain
YNR001C	CIT1	6.13822	4.15682	-1.9814	0.00581279	0.0516306	-2.19214	-1.15119	1.04094	0.000815403	0.0177087						X	X			X		CS	Citrate synthase; catalyzes the condensation of acetyl coenzyme A and oxaloacetate to form citrate; the rate-limiting enzyme of the TCA cycle; nuclear encoded mitochondrial protein; CIT1 has a paralog, CIT2, that arose from the whole genome duplication		POMP	Chaperone required for correct maturation of the 20S proteasome; short-lived chaperone; may inhibit premature dimerization of proteasome half-mers; degraded by proteasome upon completion of its assembly
YNL154C	YCK2	0.238	0.361988	0.123988	0.856482	0.643467	-0.599321	-0.411057	0.188264	0.001343	0.024649												CSNK1G2	Palmitoylated plasma membrane-bound casein kinase I (CK1) isoform; shares redundant functions with Yck1p in morphogenesis, proper septin assembly, endocytic trafficking, and glucose sensing; stabilized by Sod1p binding in the presence of glucose and oxygen, causing glucose repression of respiratory metabolism; involved in the phosphorylation and regulation of glucose sensor Rgt2p; YCK2 has a para…			Phosphoribosylanthranilate isomerase; catalyzes the third step in tryptophan biosynthesis; in 2004, the sequence of TRP1 from strain S228C was updated by changing the previously annotated internal STOP (TAA) to serine (TCA); enhances vegetative growth at low and high temperatures when used as an auxotrophic marker in strains such as W303
YGL019W	CKB1	0.893684	0.288267	-0.605417	0.898009	0.656006	-0.695697	-1.77852	-1.08282	7.57547e-05	0.00352942	X											CSNK2B	Beta regulatory subunit of casein kinase 2 (CK2); a Ser/Thr protein kinase with roles in cell growth and proliferation; CK2, comprised of CKA1, CKA2, CKB1 and CKB2, has many substrates including transcription factors and all RNA polymerases	MLH1	MLH1,MLH3	Protein required for mismatch repair in mitosis and meiosis; also required for crossing over during meiosis; forms a complex with Pms1p and Msh2p-Msh3p during mismatch repair; human homolog is associated with hereditary non-polyposis colon cancer
YMR297W	PRC1	0.927875	-0.168044	-1.09592	0.000149017	0.00698094	-0.214001	-0.485167	-0.271166	0.356003	0.484541							X					CTSA	Vacuolar carboxypeptidase Y (proteinase C, CPY); broad-specificity C-terminal exopeptidase involved in non-specific protein degradation in the vacuole; involved, along with functional homolog Prc1p, in vacuolar zymogen activation, breakdown of the autophagic body, and autophagosome-dependent protein synthesis; role in phytochelatin synthesis; localizes to the vacuole lumen; member of the serine c…			GPI-glycan remodelase; conserved phosphoesterase domain-containing protein; acts together with Emp24p/Erv25p in cargo exit from the ER; functional ortholog of mammalian GPI-glycan remodelase PGAP5; deletion confers sensitivity to 4-(N-(S-glutathionylacetyl)amino) phenylarsenoxide (GSAO)
YOR037W	CYC2	10.3084	8.07069	-2.23772	0.0332426	0.136416	-3.11637	-1.73734	1.37903	3.17643e-05	0.00178136										X		CYB5R1,CYB5R2,CYB5R3,CYB5R4,CYB5RL	Mitochondrial peripheral inner membrane protein; contains a FAD cofactor in a domain exposed in the intermembrane space; exhibits redox activity in vitro; likely participates in ligation of heme to acytochromes c and c1 (Cyc1p and Cyt1p)			Protein required for DNA repair; component of the Mre11 complex, which is involved in double strand breaks, meiotic recombination, telomere maintenance, and checkpoint signaling
YKL092C	BUD2	0.000141535	-0.739546	-0.739688	0.107057	0.257406	-0.490982	0.67006	1.16104	0.000127857	0.00502853						X			X			DAB2IP,RASA1,RASA2,RASA3,RASA4,RASA4B,RASAL1,RASAL2,RASAL3,SYNGAP1	GTPase activating factor for Rsr1p/Bud1p; plays a role in spindle position checkpoint distinct from its role in bud site selection; required for both axial and bipolar budding patterns; mutants exhibit random budding in all cell types; contains two PH-like domains		RAD52	Protein involved DNA double-strand break repair; repairs breaks in DNA during vegetative growth via recombination and single-strand annealing; anneals complementary single-stranded DNA; forms nuclear foci upon DNA replication stress; required for loading of Rad52p to DSBs; regulates replication fork progression in DNA ligase I-deficient cells; paralog of Rad52p
YGL129C	RSM23	10.9731	8.85975	-2.11335	0.00248055	0.0328983	-4.77445	-3.01091	1.76354	0.000699076	0.0163765										X		DAP3	Mitochondrial ribosomal protein of the small subunit; has similarity to mammalian apoptosis mediator proteins; null mutation prevents induction of apoptosis by overproduction of metacaspase Mca1p			Protein involved in metabolism of phytosphingosine; not an essential gene
YPL104W	MSD1	16.3056	9.11199	-7.19358	0.000677917	0.0151462	-10.4354	-6.69838	3.73698	0.00723823	0.0664241					X				X	X		DARS,DARS2	Mitochondrial aspartyl-tRNA synthetase; required for acylation of aspartyl-tRNA; yeast and bacterial aspartyl-, asparaginyl-, and lysyl-tRNA synthetases contain regions with high sequence similarity, suggesting a common ancestral gene
YDR148C	KGD2	11.0308	7.52369	-3.50713	0.0038308	0.0397376	-5.60814	-3.85583	1.75231	0.047889	0.187371								X		X		DBT,DLST	Dihydrolipoyl transsuccinylase; component of the mitochondrial alpha-ketoglutarate dehydrogenase complex, which catalyzes the oxidative decarboxylation of alpha-ketoglutarate to succinyl-CoA in the TCA cycle; phosphorylated		DERL2,DERL3	ER membrane protein that promotes export of misfolded polypeptides; required for ER-associated protein degradation of misfolded or unassembled proteins; initiates export of aberrant polypeptides from ER lumen by threading them into ER membrane and routing them to Hrd1p for ubiquitination; function normally requires N-terminal acetylation by NatB; N- and C- termini protrude into cytoplasm; similar…
YPL247C	YPL247C	0.567043	0.419117	-0.147927	0.814468	0.633025	0.357895	-0.298859	-0.656753	0.00289226	0.0403631												DCAF7
YLR270W	DCS1	17.1483	11.646	-5.50231	0.00208386	0.0289595	-10.4842	-7.60452	2.87967	0.503682	0.554356							X	X		X		DCPS	Non-essential hydrolase involved in mRNA decapping; activates Xrn1p; may function in a feedback mechanism to regulate deadenylation, contains pyrophosphatase activity and a HIT (histidine triad) motif; acts as inhibitor of neutral trehalase Nth1p; required for growth on glycerol medium; protein abundance increases in response to DNA replication stress; DCS1 has a paralog, DCS2, that arose from th…			Cullin subunit of a Roc1p-dependent E3 ubiquitin ligase complex; role in anaphase progression; required for recovery after DSB repair; implicated in Mms22-dependent DNA repair; involved with Mms1p in nonfunctional rRNA decay; modified by the ubiquitin-like protein, Rub1p
YOR173W	DCS2	0.604715	-0.731294	-1.33601	0.0102365	0.0702883	-1.43309	-0.273819	1.15927	0.000915609	0.0187351							X		X			DCPS	m(7)GpppX pyrophosphatase regulator; non-essential, stress induced regulatory protein; modulates m7G-oligoribonucleotide metabolism; inhibits Dcs1p; regulated by Msn2p, Msn4p, and the Ras-cAMP-cAPK signaling pathway; mutant has increased aneuploidy tolerance; DCS2 has a paralog, DCS1, that arose from the whole genome duplication
YPL119C	DBP1	15.4782	11.6385	-3.83967	0.0267143	0.123161	-10.2863	-7.8846	2.40172	0.00226069	0.0345766												DDX1,DDX3X,DDX3Y,DDX4,DDX41,DDX46	Putative ATP-dependent RNA helicase of the DEAD-box protein family; mutants show reduced stability of the 40S ribosomal subunit scanning through 5' untranslated regions of mRNAs; protein abundance increases in response to DNA replication stress; DBP1 has a paralog, DED1, that arose from the whole genome duplication
YDL160C	DHH1	-4.56879	-1.80797	2.76082	0.0979242	0.246453	-8.75242	-13.6273	-4.87484	0.000712353	0.0164676												DDX20,DDX46,DDX6	Cytoplasmic DEAD-box helicase, stimulates mRNA decapping; coordinates distinct steps in mRNA function and decay, interacting with both decapping and deadenylase complexes; role in translational repression, mRNA decay, and possibly mRNA export; interacts and cooperates with Ngr1p to promote specific mRNA decay; ATP- and RNA-bound form promotes processing body (PB) assembly, while ATPase stimulatio…		CHCHD7	Protein that functions in mitochondrial copper homeostasis; mitochondrial intermembrane space protein; essential for functional cytochrome oxidase expression; homologous to Cox17p; contains twin cysteine-x9-cysteine motifs
YDR332W	IRC3	13.0667	10.2549	-2.81178	0.00432886	0.0423551	-2.09481	-0.0515534	2.04326	0.00297386	0.0413114										X		DDX3X,DDX3Y,DDX46	Double-stranded DNA-dependent helicase of the DExH/D-box family; required for maintenance of the mitochondrial (mt) genome; null mutant accumulates double-stranded breaks in mt DNA; localizes to the mt matrix		PRKAB1,PRKAB2	One of three possible beta-subunits of the Snf1 kinase complex; allows nuclear localization of the Snf1 kinase complex in the presence of a nonfermentable carbon source; necessary and sufficient for phosphorylation of the Mig2p transcription factor in response to alkaline stress; functionally redundant with SIP1 and SIP2 for the phosphorylation of Mig1p in response to glucose deprivation; contain…
YGL064C	MRH4	11.3899	7.29994	-4.09	0.00345554	0.037741	-3.44358	-2.25178	1.19179	0.690523	0.624989										X		DDX46,DDX52	Mitochondrial ATP-dependent RNA helicase of the DEAD-box family; required for assembly of the large subunit of mitochondrial ribosomes; binds to the large subunit rRNA, 21S_rRNA; localizes to the matrix face of the mitochondrial inner membrane and associates with the large subunit precursor and with mature ribosomes		FKTN
YDR194C	MSS116	15.7872	11.7729	-4.01431	0.00488601	0.0457787	-8.29081	-4.68509	3.60571	0.00017092	0.00639022					X					X		DDX46,TDRD12	Mitochondrial transcription elongation factor; DEAD-box protein; required for efficient splicing of mitochondrial Group I and II introns; non-polar RNA helicase that also facilities strand annealing; promotes RNA folding by stabilizing an early assembly intermediate		TCEA1,TCEA2,TCEA3,TCEANC,TCEANC2	General transcription elongation factor TFIIS; enables RNA polymerase II to read through blocks to elongation by stimulating cleavage of nascent transcripts stalled at transcription arrest sites; maintains RNAPII elongation activity on ribosomal protein genes during conditions of transcriptional stress
YBR201W	DER1	0.721095	-0.22845	-0.949545	0.00347	0.0377475	1.63079	2.33698	0.706199	0.0121011	0.0899155												DERL2,DERL3	ER membrane protein that promotes export of misfolded polypeptides; required for ER-associated protein degradation of misfolded or unassembled proteins; initiates export of aberrant polypeptides from ER lumen by threading them into ER membrane and routing them to Hrd1p for ubiquitination; function normally requires N-terminal acetylation by NatB; N- and C- termini protrude into cytoplasm; similar…		SLC38A1,SLC38A10,SLC38A2,SLC38A3,SLC38A4,SLC38A5,SLC38A6,SLC38A7,SLC38A8	Putative transporter; member of a family of seven S. cerevisiae genes (AVT1-7) related to vesicular GABA-glycine transporters; AVT5 has a paralog, AVT6, that arose from the whole genome duplication
YIL125W	KGD1	9.00927	4.4053	-4.60397	6.5569e-05	0.00405201	-7.82185	-5.21475	2.60709	0.0245431	0.128369										X		DHTKD1,OGDH,OGDHL	Subunit of the mitochondrial alpha-ketoglutarate dehydrogenase complex; catalyzes a key step in the tricarboxylic acid (TCA) cycle, the oxidative decarboxylation of alpha-ketoglutarate to form succinyl-CoA		PET100	Chaperone that facilitates the assembly of cytochrome c oxidase; integral to the mitochondrial inner membrane; interacts with a subcomplex of subunits VII, VIIa, and VIII (Cox7p, Cox9p, and Cox8p) but not with the holoenzyme
YMR228W	MTF1	15.5021	10.6113	-4.89086	0.00436298	0.0423551	-8.8087	-4.70431	4.10439	0.0259044	0.132962					X					X		DIMT1,TFB1M,TFB2M	Mitochondrial RNA polymerase specificity factor; has structural similarity to S-adenosylmethionine-dependent methyltransferases and functional similarity to bacterial sigma-factors; Mtf1p interacts with and stabilizes the Rpo41p-promoter complex, enhancing DNA bending and melting to facilitate pre-initiation open complex formation		HEATR3	Transport adaptor or symportin; facilitates synchronized nuclear coimport of the two 5S-rRNA binding proteins Rpl5p and Rpl11p; binds to nascent Rpl5p during translation; required for biogenesis of the large ribosomal subunit; green fluorescent protein (GFP)-fusion protein localizes to the cytoplasm and nucleus
YMR287C	DSS1	16.2058	11.935	-4.27079	0.00296932	0.0352414	-7.73449	-4.73413	3.00036	0.00581356	0.0600023										X		DIS3L2	3'-5' exoribonuclease; component of the mitochondrial degradosome along with the ATP-dependent RNA helicase Suv3p; the degradosome associates with the ribosome and mediates turnover of aberrant or unprocessed RNAs		TDP1	Tyrosyl-DNA phosphodiesterase I; hydrolyzes 3' and 5'-phosphotyrosyl bonds; involved in the repair of DNA lesions created by topo I and topo II; mutations in the human homolog, TDP1, result in the a neurodegenerative disease, spinocerebellar ataxia with axonal neuropathy (SCAN1); yeast cells and human rhabdomyosarcoma lines that overexpress TDP1 both exhibit elevated dosage chromosomal instabilit…
YDR488C	PAC11	0.118711	-1.38895	-1.50766	0.000446972	0.0121933	0.133293	-0.524873	-0.658166	0.000636376	0.0161565						X						DNAI2	Dynein intermediate chain, microtubule motor protein; required for intracellular transport and cell division; acts in cytoplasmic dynein pathway; forms complex with dynein light chain Dyn2p that promotes Dyn1p homodimerization and potentiates motor processivity; Dyn2p-Pac11p complex is also important for interaction of dynein motor complex with dynactin complex; forms cortical cytoplasmic microtu…		INO80B	Protein that associates with the INO80 chromatin remodeling complex; associates with the INO80 complex under low-salt conditions; essential for growth under anaerobic conditions; protein abundance increases in response to DNA replication stress
YMR214W	SCJ1	-0.658873	0.368364	1.02724	0.00195427	0.0280998	0.49279	0.369881	-0.122908	0.939586	0.693822												DNAJA1,DNAJA4,DNAJC11	One of several homologs of bacterial chaperone DnaJ; located in the ER lumen where it cooperates with Kar2p to mediate maturation of proteins			Cell wall and vacuolar protein; required for wild-type resistance to vanadate; SVS1 has a paralog, SRL1, that arose from the whole genome duplication
YDR121W	DPB4	-2.78579	-2.21425	0.571548	0.328748	0.439425	1.64762	0.30531	-1.34231	0.000874767	0.0182697	X			X								DR1,FAM47DP,FAM47E,NFYB,POLE3	Subunit of DNA pol epsilon and of ISW2 chromatin accessibility complex; involved in both chromosomal DNA replication and inheritance of telomeric silencing; stabilizes the interaction of Pol epsilon with primer-template DNA, positively affecting the processivity of the polymerase and exonuclease activities of Pol epsilon; interacts with extranucleosomal DNA and acts as anchor point for ISW2 compl…			RNAPII degradation factor; forms a complex with Rad26p in chromatin, enables ubiquitination and proteolysis of RNAPII present in an elongation complex; mutant is deficient in Zip1p loading onto chromosomes during meiosis
YDL219W	DTD1	0.806652	-0.150605	-0.957257	0.000467438	0.0121933	1.12211	1.75917	0.637064	0.000515612	0.0140714						X						DTD1	D-Tyr-tRNA(Tyr) deacylase; functions in protein translation, may affect nonsense suppression via alteration of the protein synthesis machinery; ubiquitous among eukaryotes			Component of Shu complex (aka PCSS complex); Shu complex also includes Psy3, Shu1, Shu2, and promotes error-free DNA repair,; Shu complex mediates inhibition of Srs2p function; promotes formation of Rad51p filaments; Psy3p and Csm2p contain similar DNA-binding regions which work together to form a single DNA binding site; required for accurate chromosome segregation during meiosis
YER028C	MIG3	11.3984	5.58058	-5.81781	0.000626865	0.0147128	-6.11191	-1.25403	4.85788	0.00248082	0.0361193	X											EGR1,EGR2,EGR3,EGR4,WT1	Transcriptional regulator; partially nonfunctional in S288C strains but has a major role in catabolite repression and ethanol response in some other strains; involved in response to toxic agents; phosphorylation by Snf1p or the Mec1p pathway inactivates Mig3p, allowing induction of damage response genes		DBT,DLST	Dihydrolipoyl transsuccinylase; component of the mitochondrial alpha-ketoglutarate dehydrogenase complex, which catalyzes the oxidative decarboxylation of alpha-ketoglutarate to succinyl-CoA in the TCA cycle; phosphorylated
YPR163C	TIF3	-8.09706	-5.36109	2.73597	0.951245	0.667078	-3.38311	-6.1314	-2.74829	0.00184136	0.0308082							X		X			EIF4B,EIF4H	Translation initiation factor eIF-4B; contains an RNA recognition motif and binds to single-stranded RNA; has RNA annealing activity; interacts with Rps20p at the head of the 40S ribosomal subunit and alters the structure of the mRNA entry channel
YMR312W	ELP6	-6.60049	-4.34608	2.25441	0.00100167	0.0195257	3.77983	1.32238	-2.45745	0.0202283	0.116575												ELP6	Subunit of hexameric RecA-like ATPase Elp456 Elongator subcomplex; which is required for modification of wobble nucleosides in tRNA; required for Elongator structural integrity			Putative plasma membrane permease; proposed to be involved in carboxylic acid uptake and repressed by thiamine; substrate of Dbf2p/Mob1p kinase; transcription is altered if mitochondrial dysfunction occurs
YBR098W	MMS4	-1.79991	1.59514	3.39505	1.51696e-07	4.00544e-05	0.459837	-3.67865	-4.13849	3.32898e-12	3.36044e-09	X				X	X						EME1,EME2	Subunit of structure-specific Mms4p-Mus81p endonuclease; cleaves branched DNA; involved in recombination, DNA repair, and joint molecule formation/resolution during meiotic recombination; phosphorylation of the non-catalytic subunit Mms4p by Cdc28p and Cdc5p during mitotic cell cycle activates the function of Mms4p-Mus81p			Autophagy-specific subunit of phosphatidylinositol 3-kinase complex I; Atg14p targets complex I to the phagophore assembly site (PAS); required for localizing additional ATG proteins to the PAS; required for overflow degradation of misfolded proteins when ERAD is saturated; homolog of human Barkor; other members are Vps34, Vps15, and Vps30p
YML095C	RAD10	0.568091	0.800757	0.232665	0.806432	0.631231	3.573	-4.18889	-7.76189	1.35595e-13	4.10629e-10	X	X	X		X							ERCC1	Single-stranded DNA endonuclease (with Rad1p); cleaves single-stranded DNA during nucleotide excision repair and double-strand break repair; subunit of Nucleotide Excision Repair Factor 1 (NEF1); homolog of human ERCC1 protein			RNA binding protein that associates with polysomes; may be involved in regulating mRNA translation; involved in the copper-dependent mineralization of copper sulfide complexes on cell surface in cells cultured in copper salts; SLF1 has a paralog, SRO9, that arose from the whole genome duplication; protein abundance increases in response to DNA replication stress
YJR035W	RAD26	-0.962878	-1.6567	-0.693821	0.764443	0.615833	0.278608	-0.924219	-1.20283	4.19604e-05	0.00222932	X		X		X							ERCC6,ERCC6L,ERCC6L2	Protein involved in transcription-coupled nucleotide excision repair; repairs UV-induced DNA lesions; recruitment to DNA lesions is dependent on an elongating RNA polymerase II; homolog of human CSB protein		UQCRC2	Subunit 2 of ubiquinol cytochrome-c reductase (Complex III); Complex III is a component of the mitochondrial inner membrane electron transport chain; phosphorylated; transcription is regulated by Hap1p, Hap2p/Hap3p, and heme
YBR163W	EXO5	16.9987	11.0687	-5.92999	0.0011341	0.0207169	-12.6328	-8.44804	4.1848	0.000342794	0.0107021										X		EXO5	Mitochondrial 5'-3' exonuclease and sliding exonuclease; required for mitochondrial genome maintenance; distantly related to the RecB nuclease domain of bacterial RecBCD recombinases; may be regulated by the transcription factor Ace2		ATP5H	Subunit d of the stator stalk of mitochondrial F1F0 ATP synthase; F1F0 ATP synthase is a large, evolutionarily conserved enzyme complex required for ATP synthesis
YIR002C	MPH1	0.0384782	-0.467559	-0.506038	0.0898579	0.236727	0.102435	-0.390352	-0.492787	0.00237853	0.0357364	X											FANCM	3'-5' DNA helicase involved in error-free bypass of DNA lesions; binds flap DNA, stimulates activity of Rad27p and Dna2p; prevents crossovers between ectopic sequences by removing substrates for Mus81-Mms4 or Rad1-Rad10 cleavage; homolog of human FANCM Fanconi anemia protein that is involved in stabilizing and remodeling blocked replication forks; member of SF2 DExD/H superfamily of helicases; no…		PEX3	Peroxisomal membrane protein (PMP); required for proper localization and stability of PMPs; anchors peroxisome retention factor Inp1p at the peroxisomal membrane; interacts with Pex19p
YJL112W	MDV1	1.47529	0.204272	-1.27101	0.000108888	0.00554848	2.62372	2.70155	0.0778376	0.887147	0.684063										X		FBXO16,FBXW12,WDR48,WDR49,WDR54,WDR86	Peripheral protein of cytosolic face of mitochondrial outer membrane; required for mitochondrial fission; interacts with Fis1p and with the self-assembled oligomeric form of the dynamin-related GTPase Dnm1p; contains WD repeats; MDV1 has a paralog, CAF4, that arose from the whole genome duplication		ALDH18A1	Gamma-glutamyl phosphate reductase; catalyzes the second step in proline biosynthesis
YJL092W	SRS2	-3.20364	4.32076	7.52439	1.3919e-09	6.73794e-07	-0.784709	-8.01038	-7.22567	4.31521e-10	1.452e-07	X	X			X	X		X				FBXO18	DNA helicase and DNA-dependent ATPase; role in DNA repair and checkpoint recovery, in the proper timing of commitment to meiotic recombination and the Meiosis I to II transition; blocks trinucleotide repeat expansion; affects genome stability; disassembles Rad51p nucleoprotein filaments during meiotic recombination; stimulates Mus81p-Mms4p endonuclease activity independent of catalytic activity; …			Serine/threonine protein phosphatase Z, isoform of Ppz1p; involved in regulation of potassium transport, which affects osmotic stability, cell cycle progression, and halotolerance
YHR158C	KEL1	-0.455407	0.870309	1.32572	0.00370387	0.0394061	3.38362	2.62314	-0.760473	0.120542	0.297267					X	X						FBXO42,HCFC1,HCFC2,KLHDC1,KLHDC10,KLHDC2,KLHDC3,KLHDC4,KLHDC9,LZTR1,RABEPK	Protein required for proper cell fusion and cell morphology; forms a complex with Bud14p and Kel2p that regulates Bnr1p (formin) to affect actin cable assembly, cytokinesis, and polarized growth; functions in a complex with Kel2p to negatively regulate mitotic exit, interacts with Tem1p and Lte1p; localizes to regions of polarized growth; potential Cdc28p substrate			Putative protein tyrosine phosphatase; required for cell cycle arrest in response to oxidative damage of DNA
YHL032C	GUT1	0.152347	0.108671	-0.0436764	0.198476	0.347063	0.176364	1.32182	1.14545	0.00191385	0.0313288										X		FGGY,GK,GK2,GK3P,GK5	Glycerol kinase; converts glycerol to glycerol-3-phosphate; glucose repression of expression is mediated by Adr1p and Ino2p-Ino4p; derepression of expression on non-fermentable carbon sources is mediated by Opi1p and Rsf1p	LARS2	LARS2,MARS2	Mitochondrial leucyl-tRNA synthetase; also has direct role in splicing of several mitochondrial group I introns; indirectly required for mitochondrial genome maintenance; human homolog LARS2 can complement yeast null mutant, and is implicated in Perrault syndrome
YJR061W	MNN14	1.36272	1.0116	-0.351117	0.239822	0.380012	1.00074	1.50211	0.501372	0.00310456	0.0419168												FKTN			XPA	Protein that recognizes and binds damaged DNA during NER; subunit of Nucleotide Excision Repair Factor 1 (NEF1); contains zinc finger motif; homolog of human XPA protein; NER stands for nucleotide excision repair
YGL136C	MRM2	1.77775	6.76136	4.98361	2.11857e-08	6.15336e-06	-3.89327	-4.17365	-0.280382	0.921795	0.690549										X		FTSJ2	Mitochondrial 2' O-ribose methyltransferase; required for methylation of U(2791) in 21S rRNA; MRM2 deletion confers thermosensitive respiration and loss of mitochondrial DNA; has similarity to Spb1p and Trm7p, and to E. coli FtsJ/RrmJ		DDX46,DDX52	Mitochondrial ATP-dependent RNA helicase of the DEAD-box family; required for assembly of the large subunit of mitochondrial ribosomes; binds to the large subunit rRNA, 21S_rRNA; localizes to the matrix face of the mitochondrial inner membrane and associates with the large subunit precursor and with mature ribosomes
YGR192C	TDH3	-1.02465	-1.42378	-0.39913	0.145999	0.304296	-1.33016	-0.426711	0.903444	0.00404326	0.0495725										X		GAPDH,GAPDHS	Glyceraldehyde-3-phosphate dehydrogenase (GAPDH), isozyme 3; involved in glycolysis and gluconeogenesis; tetramer that catalyzes the reaction of glyceraldehyde-3-phosphate to 1,3 bis-phosphoglycerate; detected in the cytoplasm and cell wall; GAPDH-derived antimicrobial peptides secreted by S. cerevisiae are active against a wide variety of wine-related yeasts and bacteria; binds AU-rich RNA		DARS,DARS2	Mitochondrial aspartyl-tRNA synthetase; required for acylation of aspartyl-tRNA; yeast and bacterial aspartyl-, asparaginyl-, and lysyl-tRNA synthetases contain regions with high sequence similarity, suggesting a common ancestral gene
YML097C	VPS9	1.59975	3.42402	1.82427	7.25396e-05	0.00426558	-1.95138	-1.72193	0.229458	0.845475	0.67114												GAPVD1,RABGEF1	Guanine nucleotide exchange factor (GEF) and ubiquitin receptor; involved in vesicle-mediated vacuolar transport, including Golgi-endosome trafficking and sorting through the multivesicular body (MVB); stimulates the intrinsic guanine nucleotide exchange activity of Rab family members (Vps21p/Ypt52p/Ypt53p); partially redundant with GEF MUK1; required for localization of the CORVET complex to end…		RNF222,RNF4	Subunit of Slx5-Slx8 SUMO-targeted ubiquitin ligase (STUbL) complex; role in proteolysis of spindle positioning protein Kar9, DNA repair proteins Rad52p and Rad57p; stimulated by SUMO-modified substrates; contains a C-terminal RING domain; forms nuclear foci upon DNA replication stress; required for maintenance of genome integrity like human ortholog RNF
YPL070W	MUK1	-7.42701	-3.81586	3.61115	0.00047128	0.0121933	-4.01386	-1.41383	2.60003	0.0203499	0.116718												GAPVD1,RABGEF1	Guanine nucleotide exchange factor (GEF); involved in vesicle-mediated vacuolar transport, including Golgi-endosome trafficking and sorting through the multivesicular body (MVB); specifically stimulates the intrinsic guanine nucleotide exchange activity of Rab family members (Vps21p/Ypt52p/Ypt53p); partially redundant with GEF VPS9; required for localization of the CORVET complex to endosomes; co…		UAP1,UAP1L1,UGP2
YGL234W	ADE5,7	-1.93263	3.62233	5.55496	0.00138522	0.0236668	-11.7274	-10.7257	1.00173	0.252935	0.416382												GART	Enzyme of the 'de novo' purine nucleotide biosynthetic pathway; contains aminoimidazole ribotide synthetase and glycinamide ribotide synthetase activities		MRPL28	Mitochondrial ribosomal protein of the large subunit; two mitochondrial ribosomal proteins, YmL14 and YmL24, have been assigned to the same gene
YBL080C	PET112	14.9381	11.2552	-3.68293	0.000771123	0.0158845	-5.57369	-3.68344	1.89024	0.000686096	0.0163765										X		GATB	Subunit of the trimeric GatFAB AmidoTransferase(AdT) complex; involved in the formation of Q-tRNAQ; mutation is functionally complemented by the bacterial GatB ortholog		NAGS	Acetylglutamate kinase and N-acetyl-gamma-glutamyl-phosphate reductase; N-acetyl-L-glutamate kinase (NAGK) catalyzes the 2nd and N-acetyl-gamma-glutamyl-phosphate reductase (NAGSA), the 3rd step in arginine biosynthesis; synthesized as a precursor which is processed in the mitochondrion to yield mature NAGK and NAGSA; enzymes form a metabolon complex with Arg2p; NAGK C-terminal domain stabilizes …
YPL206C	PGC1	-6.90695	-1.81012	5.09683	0.00168328	0.025868	-5.05479	-5.7446	-0.68981	0.00435735	0.0519512										X		GDE1	Phosphatidylglycerol phospholipase C; regulates phosphatidylglycerol (PG) accumulation via a phospholipase C-type degradation mechanism; PG levels affect mitochondrial function; contains glycerophosphodiester phosphodiesterase motifs
YJL102W	MEF2	12.4288	4.23023	-8.19861	0.00239683	0.0319339	-11.1143	-8.52442	2.5899	0.517595	0.557858										X		GFM2	Mitochondrial elongation factor involved in translational elongation		PSMA2	Alpha 2 subunit of the 20S proteasome
YOL110W	SHR5	-0.294401	-0.9619	-0.667499	0.521388	0.535491	-1.80069	-0.661545	1.13915	0.000848758	0.0178496												GOLGA7,GOLGA7B	Palmitoyltransferase subunit; this complex adds a palmitoyl lipid moiety to heterolipidated substrates such as Ras1p and Ras2p through a thioester linkage; palmitoylation is required for Ras2p membrane localization; Palmitoyltransferase is composed of Shr5p and Erf2		VPS41,VPS8	Membrane-binding component of the CORVET complex; involved in endosomal vesicle tethering and fusion in the endosome to vacuole protein targeting pathway; interacts with Vps21p; contains RING finger motif
YOL059W	GPD2	-1.41305	-1.79734	-0.384291	0.372874	0.462586	3.752	2.57863	-1.17337	0.00168495	0.0286665										X		GPD1,GPD1L	NAD-dependent glycerol 3-phosphate dehydrogenase; expression is controlled by an oxygen-independent signaling pathway required to regulate metabolism under anoxic conditions; located in cytosol and mitochondria; constitutively active but is inactivated via phosphorylation by energy-stress responsive kinase SNF1; GPD2 has a paralog, GPD1, that arose from the whole genome duplication		VPS13A,VPS13B,VPS13C,VPS13D	Protein involved in prospore membrane morphogenesis; peripheral membrane protein that localizes to the prospore membrane and at numerous membrane contact sites; involved in sporulation, vacuolar protein sorting, prospore membrane formation during sporulation, and protein-Golgi retention; required for mitochondrial integrity; contains a PH-like domain; homologous to human CHAC and COH1 which are i…
YIL155C	GUT2	1.95496	1.57385	-0.381105	0.45535	0.507312	-0.0783958	1.09925	1.17764	0.0016285	0.0280093										X		GPD2	Mitochondrial glycerol-3-phosphate dehydrogenase; expression is repressed by both glucose and cAMP and derepressed by non-fermentable carbon sources in a Snf1p, Rsf1p, Hap2/3/4/5 complex dependent manner		PEX19	Chaperone and import receptor for newly-synthesized class I PMPs; binds peroxisomal membrane proteins (PMPs) in the cytoplasm and delivers them to the peroxisome for subsequent insertion into the peroxisomal membrane; interacts with Myo2p and contributes to peroxisome partitioning
YHR080C	LAM4	1.02072	-0.369578	-1.3903	4.03202e-06	0.000487957	2.02854	3.00567	0.977134	0.000982934	0.0194871										X		GRAMD1A,GRAMD1B,GRAMD1C,GRAMD2,GRAMD3	Sterol-binding protein that localizes to puncta in the cortical ER; sterol binding occurs via two StART-like domains; one of six StART-like domain-containing proteins in yeast that may be involved in intracellular sterol transfer between membranes; conserved across eukaryotes; has both GRAM and StART-like (VASt) domains; the authentic, non-tagged protein is detected in highly purified mitochondri…			Nicotinate phosphoribosyltransferase; acts in the salvage pathway of NAD+ biosynthesis; required for silencing at rDNA and telomeres and has a role in silencing at mating-type loci; localized to the nucleus
YGL021W	ALK1	-1.15611	-0.218136	0.937971	0.00326209	0.0367237	2.202	2.41666	0.21466	0.22228	0.39067						X						GSG2,IRAK1,IRAK2,IRAK3,IRAK4	Protein kinase; along with its paralog, ALK2, required for proper spindle positioning and nuclear segregation following mitotic arrest, proper organization of cell polarity factors in mitosis, proper localization of formins and polarity factors, and survival in cells that activate spindle assembly checkpoint; phosphorylated in response to DNA damage; ALK1 has a paralog, ALK2, that arose from the …	UBE2V1, UBE2V2	UBE2V1,UBE2V2	Ubiquitin-conjugating enzyme variant; involved in error-free postreplication repair; forms a heteromeric complex with Ubc13p, an active ubiquitin-conjugating enzyme; cooperates with chromatin-associated RING finger proteins, Rad18p and Rad5p; protein abundance increases in response to DNA replication stress
YOL012C	HTZ1	-0.53074	0.351322	0.882062	0.00407793	0.0412694	1.09253	1.05987	-0.0326604	0.990252	0.70469					X	X						H2AFV,H2AFZ	Histone variant H2AZ; exchanged for histone H2A in nucleosomes by the SWR1 complex; involved in transcriptional regulation through prevention of the spread of silent heterochromatin; Htz1p-containing nucleosomes facilitate RNA Pol II passage by affecting correct assembly and modification status of RNA Pol II elongation complexes and by favoring efficient nucleosome remodeling			Protein involved in vacuole morphogenesis; acts at an early step of homotypic vacuole fusion that is required for vacuole tethering
YPL116W	HOS3	1.53398	0.607273	-0.926705	0.0250633	0.118561	0.305079	1.24838	0.943301	0.000175804	0.00649263						X						HDAC6	Trichostatin A-insensitive homodimeric histone deacetylase (HDAC); specificity in vitro for histones H3, H4, H2A, and H2B; similar to Hda1p, Rpd3p, Hos1p, and Hos2p; deletion results in increased histone acetylation at rDNA repeats
YDL063C	SYO1	-4.9361	-2.5488	2.3873	0.00319296	0.0363684	-1.46154	-1.95984	-0.498302	0.281897	0.436444						X	X					HEATR3	Transport adaptor or symportin; facilitates synchronized nuclear coimport of the two 5S-rRNA binding proteins Rpl5p and Rpl11p; binds to nascent Rpl5p during translation; required for biogenesis of the large ribosomal subunit; green fluorescent protein (GFP)-fusion protein localizes to the cytoplasm and nucleus		CSNK2B	Beta regulatory subunit of casein kinase 2 (CK2); a Ser/Thr protein kinase with roles in cell growth and proliferation; CK2, comprised of CKA1, CKA2, CKB1 and CKB2, has many substrates including transcription factors and all RNA polymerases
YKL032C	IXR1	1.91946	3.53496	1.6155	0.00272626	0.0338768	0.912401	1.65159	0.739187	0.21484	0.387039	X		X									HMG20A,HMG20B,SMARCE1,SP110,SP140,SP140L,TFAM,UBTF,UBTFL1,UBTFL6	Transcriptional repressor that regulates hypoxic genes during normoxia; involved in the aerobic repression of genes such as COX5b, TIR1, and HEM13; binds DNA intrastrand cross-links formed by cisplatin; HMG (high mobility group box) domain containing protein which binds and bends cisplatin-modified DNA, blocking excision repair; IXR1 has a paralog, ABF2, that arose from the whole genome duplicati…		RAD51,RAD51B,RAD51C,RAD51D	Strand exchange protein; forms a helical filament with DNA that searches for homology; involved in the recombinational repair of double-strand breaks in DNA during vegetative growth and meiosis; homolog of Dmc1p and bacterial RecA protein
YOR140W	SFL1	-5.1962	-1.29207	3.90413	0.0216055	0.110676	1.12333	-0.741041	-1.86438	0.000645246	0.0161565												HSF5,HSFX1,HSFY1,HSFY2	Transcriptional repressor and activator; involved in repression of flocculation-related genes, and activation of stress responsive genes; has direct role in INO1 transcriptional memory; negatively regulated by cAMP-dependent protein kinase A subunit Tpk2p; premature stop codon (C1430T, Q477-stop) in SK1 background is linked to the aggressively invasive phenotype of SK1 relative to BY4741 (S288C)
YPL106C	SSE1	1.13561	-0.435044	-1.57066	0.000335313	0.0109428	-0.932402	-0.65804	0.274362	0.0208583	0.118511												HSPA4,HSPA4L,HSPH1,HYOU1	ATPase component of heat shock protein Hsp90 chaperone complex; serves as nucleotide exchange factor to load ATP onto the SSA class of cytosolic Hsp70s; plays a role in prion propagation and determining prion variants; binds unfolded proteins; member of Hsp110 subclass of HSP70 proteins; deletion results in spindle elongation in S phase; SSE1 has a paralog, SSE2, that arose from the whole genome …
YLR096W	KIN2	0.536774	-0.354425	-0.891199	0.043687	0.159671	0.582821	2.01945	1.43663	6.29728e-06	0.000454057												HUNK,NUAK1,NUAK2,PRKAA2	S/T protein kinase; regulates polarized exocytosis and the Ire1p-mediated UPR; regulates HAC1 mRNA translocation, splicing and translation with KIN1 during ER stress; direct phosphorylation of Sec9p (S190) is enhanced by prior substrate priming (S192); localizes to the cytoplasmic face of the PM and sites of polarized growth; may regulate septin and cell wall organization; activation loop phospho…		PPP2R4	Peptidyl-prolyl cis/trans-isomerase; activator of the phosphotyrosyl phosphatase activity of PP2A; involved in G1 phase progression, microtubule dynamics, bud morphogenesis and DNA repair; required for rapid reduction of Sgs1p levels in response to rapamycin; subunit of the Tap42p-Sit4p-Rrd1p complex; protein increases in abundance and relative distribution to the nucleus increases upon DNA repli…
YLR288C	MEC3	-0.251216	4.59548	4.84669	8.46633e-10	4.91808e-07	-0.230818	-3.17342	-2.9426	5.93225e-09	1.28321e-06	X				X	X						HUS1,HUS1B	DNA damage and meiotic pachytene checkpoint protein; subunit of a heterotrimeric complex (Rad17p-Mec3p-Ddc1p) that forms a sliding clamp, loaded onto partial duplex DNA by a clamp loader complex; homolog of human and S. pombe Hus1			Histone acetyltransferase; critical for cell survival in presence of DNA damage during S phase, required for recovery after DSB repair; acetylates H3K56, H3K9; H3K56 acetylation activity required for expression homeostasis, buffering of mRNA synthesis rate against changes in gene dosage during S phase; involved in non-homologous end joining and regulation of Ty1 transposition; prevents hyper-ampl…
YBR264C	YPT10	0.222961	-0.578334	-0.801295	0.00178469	0.026998	1.65003	1.73238	0.0823458	0.817539	0.662865												IFT27,RAB17,RAB33A,RAB33B,RAB5A,RAB5B,RAB5C	Rab family GTP-binding protein; contains the PEST signal sequence specific for proteolytic enzymes; may be involved in vesicular transport; overexpression leads to accumulation of Golgi-like cisternae with budding vesicles	BCS1L	BCS1L	Protein translocase and chaperone required for Complex III assembly; member of the AAA ATPase family; forms a homo-oligomeric complex in the mitochondrial inner membrane that translocates the C-terminal domain of Rip1p from the matrix across the inner membrane and delivers it to an assembly intermediate of respiratory Complex III; also required for assembly of the Qcr10p subunit; mutation is func…
YLR384C	IKI3	-4.70644	-0.874994	3.83145	0.000105507	0.00547222	-3.49505	-3.7992	-0.304151	0.298793	0.446619								X				IKBKAP	Subunit of Elongator complex; Elongator is required for modification of wobble nucleosides in tRNA; maintains structural integrity of Elongator; homolog of human IKAP, mutations in which cause familial dysautonomia (FD)		SDHD	Membrane anchor subunit of succinate dehydrogenase (SDH); involved in coupling the oxidation of succinate to the transfer of electrons to ubiquinone as part of the TCA cycle and the mitochondrial respiratory chain; has similarity to human SDH subunit D (SDHD), which is implicated in paraganglioma
YDL006W	PTC1	4.36405	7.9404	3.57636	2.50827e-06	0.000331147	-0.217246	-1.59698	-1.37973	4.48382e-06	0.000357332												ILKAP,PPM1D,PPM1E,PPM1F,PPM1K,PPM1N	Type 2C protein phosphatase (PP2C); dephosphorylates Hog1p, inactivating osmosensing MAPK cascade; involved in Fus3p activation during pheromone response; deletion affects precursor tRNA splicing, mitochondrial inheritance, and sporulation		ANGEL2,CNOT6,CNOT6L,NOCT	Component of the CCR4-NOT transcriptional complex; CCR4-NOT is involved in regulation of gene expression; component of the major cytoplasmic deadenylase, which is involved in mRNA poly(A) tail shortening
YKR016W	MIC60	2.94587	1.41749	-1.52838	0.0031707	0.0362569	-1.90831	-0.826017	1.0823	0.00285091	0.0401561										X		IMMT	Component of the MICOS complex; MICOS (formerly MINOS or MitOS) is a mitochondrial inner membrane complex that extends into the intermembrane space and has a role in the maintenance of crista junctions, inner membrane architecture, and formation of contact sites to the outer membrane; Mic60p is also involved in import of intermembrane space (IMS) proteins, probably by positioning Mia40p relative …			Plasma membrane protein of unknown function; involved in the proteolytic activation of Rim101p in response to alkaline pH; interacts with Rim21p and Dfg16p to form a pH-sensing complex in the Rim101 pathway and is required to maintain Rim21p levels; has similarity to A. nidulans PalI;
YNL215W	IES2	-3.97062	-3.0087	0.961922	0.0521805	0.174807	3.05251	1.49118	-1.56133	0.000929208	0.0188176					X							INO80B	Protein that associates with the INO80 chromatin remodeling complex; associates with the INO80 complex under low-salt conditions; essential for growth under anaerobic conditions; protein abundance increases in response to DNA replication stress			Component of transport protein particle (TRAPP) complex II; TRAPPII is a multimeric guanine nucleotide-exchange factor for the GTPase Ypt1p, regulating intra-Golgi and endosome-Golgi traffic; role in cell wall beta-glucan biosynthesis and the stress response
YCL037C	SRO9	-1.37795	0.212718	1.59066	0.000235501	0.00889018	0.122744	-1.45799	-1.58074	0.00628083	0.0621712					X		X					LARP1,LARP1B,LARP4,LARP4B	Cytoplasmic RNA-binding protein; shuttles between nucleus and cytoplasm and is exported from the nucleus in an mRNA export-dependent manner; associates with translating ribosomes; involved in heme regulation of Hap1p as a component of the HMC complex, also involved in the organization of actin filaments; contains a La motif; SRO9 has a paralog, SLF1, that arose from the whole genome duplication		NEB,NEBL	Protein implicated in polar growth, functionally redundant with Boi1p; interacts with bud-emergence protein Bem1p; contains an SH3 (src homology 3) domain and a PH (pleckstrin homology) domain; BOI2 has a paralog, BOI1, that arose from the whole genome duplication
YPR147C	YPR147C	-0.553009	-0.931675	-0.378666	0.0340567	0.138929	-0.0151958	1.08468	1.09988	9.92712e-06	0.000699136												LDAH	Bifunctional triacylglycerol lipase and short chain ester hydrolase; null mutant results in the accumulation of both triacylglycerol and fatty acids derived from neutral lipids and phospholipids as well as an increase in the quantity of lipid droplets; contains an alpha/beta hydrolase domain with a conserved GXSXG lipase motif; localizes to lipid droplets; GFP-fusion protein localizes to the cyto…		N4BP2L2
YOR123C	LEO1	-1.19729	0.242017	1.43931	0.0227374	0.112526	2.51122	1.79591	-0.715302	0.0026759	0.0380449	X		X									LEO1	Component of the Paf1 complex; which associates with RNA polymerase II and is involved in histone methylation; plays a role in regulating Ty1 transposition; involved in transcription elongation as demonstrated by the G-less-based run-on (GLRO) assay
YJL046W	AIM22	12.3725	7.45832	-4.91418	0.00316449	0.0362569	-9.48156	-6.16028	3.32128	0.121636	0.297786										X		LIPT1	Putative lipoate-protein ligase; required along with Lip2 and Lip5 for lipoylation of Lat1p and Kgd2p; similar to E. coli LplA; null mutant displays reduced frequency of mitochondrial genome loss		POLD3	Third subunit of DNA polymerase delta; involved in chromosomal DNA replication; required for error-prone DNA synthesis in the presence of DNA damage and processivity; forms a complex with Rev3p, Rev7p and Pol31p; interacts with Hys2p, PCNA (Pol30p), and Pol1p
YER077C	MRX1	14.8473	10.4976	-4.34971	0.00058587	0.0142996	-7.66993	-4.73803	2.9319	0.000694813	0.0163765										X		LRPPRC			C1QBP	Specific translational activator for the mitochondrial COX1 mRNA; acidic protein of the mitochondrial matrix; related to the human complement receptor gC1q-R
YOR085W	OST3	-0.938513	-0.56386	0.374653	0.166196	0.325134	-0.103655	-0.581683	-0.478028	0.000262452	0.0086391												MAGT1,TUSC3	Gamma subunit of the oligosaccharyltransferase complex of the ER lumen; complex catalyzes asparagine-linked glycosylation of newly synthesized proteins; Ost3p is important for N-glycosylation of a subset of proteins
YJL095W	BCK1	-2.47126	-0.340166	2.1311	0.00202047	0.0284876	-1.9043	-2.75905	-0.854751	0.787518	0.653888												MAP3K1,MAP3K19,MAP3K2,MAP3K3,NRBP1,NRBP2,WNK1,WNK2,WNK3,WNK4	MAPKKK acting in the protein kinase C signaling pathway; the kinase C signaling pathway controls cell integrity; upon activation by Pkc1p phosphorylates downstream kinases Mkk1p and Mkk2p; MAPKKK is an acronym for mitogen-activated protein (MAP) kinase kinase kinase		PCSK9	Vacuolar proteinase B (yscB) with H3 N-terminal endopeptidase activity; serine protease of the subtilisin family; involved in protein degradation in the vacuole and required for full protein degradation during sporulation; activity inhibited by Pbi2p; protein abundance increases in response to DNA replication stress; PRB1 has a paralog, YSP3, that arose from the whole genome duplication
YER016W	BIM1	2.74122	5.58069	2.83947	0.000654208	0.0149617	-2.77668	-3.85691	-1.08022	0.00112182	0.0211011					X	X						MAPRE1,MAPRE2,MAPRE3	Microtubule plus end-tracking protein; together with Kar9p makes up the cortical microtubule capture site and delays the exit from mitosis when the spindle is oriented abnormally; homolog of human end binding protein 1 (EB1)		FBXO42,HCFC1,HCFC2,KLHDC1,KLHDC10,KLHDC2,KLHDC3,KLHDC4,KLHDC9,LZTR1,RABEPK	Protein required for proper cell fusion and cell morphology; forms a complex with Bud14p and Kel2p that regulates Bnr1p (formin) to affect actin cable assembly, cytokinesis, and polarized growth; functions in a complex with Kel2p to negatively regulate mitotic exit, interacts with Tem1p and Lte1p; localizes to regions of polarized growth; potential Cdc28p substrate
YDR159W	SAC3	-6.19526	-1.88214	4.31312	0.0491751	0.170945	-8.27972	-12.7835	-4.50383	0.000815543	0.0177087	X		X									MCM3AP,SAC3D1	mRNA export factor; required for biogenesis of the small ribosomal subunit; component of TREX-2 complex (Sac3p-Thp1p-Sus1p-Cdc31p) involved in transcription elongation and mRNA export from the nucleus; involved in post-transcriptional tethering of active genes to the nuclear periphery and to non-nascent mRNP; similar to the human germinal center-associated nuclear protein (GANP)		PLAA	WD-repeat protein involved in ubiquitin-mediated protein degradation; Ub-binding protein with a role in Ub homeostasis; substrate-recruiting adaptor for Cdc48p in mitochondria-associated degradation; inhibits degradation of Ufd2p-dependent substrates; facilitates proteolysis of Cse4p, a centromeric H3-like protein; required for ribophagy; promotes NHEJ in postdiauxic/stationary phase; protein inc…
YOL126C	MDH2	-0.24156	-1.28983	-1.04827	0.198942	0.347251	-1.28942	-0.54327	0.746151	0.00348758	0.0442508												MDH2	Cytoplasmic malate dehydrogenase; one of three isozymes that catalyze interconversion of malate and oxaloacetate; involved in the glyoxylate cycle and gluconeogenesis during growth on two-carbon compounds; interacts with Pck1p and Fbp1		GAPVD1,RABGEF1	Guanine nucleotide exchange factor (GEF) and ubiquitin receptor; involved in vesicle-mediated vacuolar transport, including Golgi-endosome trafficking and sorting through the multivesicular body (MVB); stimulates the intrinsic guanine nucleotide exchange activity of Rab family members (Vps21p/Ypt52p/Ypt53p); partially redundant with GEF MUK1; required for localization of the CORVET complex to end…
YGL127C	SOH1	-1.17148	-1.8008	-0.629327	0.764009	0.615833	3.63644	0.0212236	-3.61522	0.000445687	0.012733	X											MED31	Subunit of the RNA polymerase II mediator complex; associates with core polymerase subunits to form the RNA polymerase II holoenzyme; involved in telomere maintenance; conserved with other metazoan MED31 subunits		FANCM	3'-5' DNA helicase involved in error-free bypass of DNA lesions; binds flap DNA, stimulates activity of Rad27p and Dna2p; prevents crossovers between ectopic sequences by removing substrates for Mus81-Mms4 or Rad1-Rad10 cleavage; homolog of human FANCM Fanconi anemia protein that is involved in stabilizing and remodeling blocked replication forks; member of SF2 DExD/H superfamily of helicases; no…
YPL177C	CUP9	1.572	0.114778	-1.45722	0.00539622	0.0483743	2.62913	2.9396	0.310464	0.682313	0.623251												MEIS1,MEIS2,MEIS3,MEIS3P1,MEIS3P2,PBX1,PBX2,PBX3,PBX4,PKNOX1,PKNOX2,TGIF1,TGIF2,TGIF2LX,TGIF2LY	Homeodomain-containing transcriptional repressor; regulates expression of PTR2, which encodes a major peptide transporter; imported peptides activate ubiquitin-dependent proteolysis, resulting in degradation of Cup9p and de-repression of PTR2 transcription; CUP9 has a paralog, TOS8, that arose from the whole genome duplication; protein abundance increases in response to DNA replication stress
YFR006W	YFR006W	0.931521	-0.251785	-1.18331	4.70197e-06	0.000525263	1.19096	1.56657	0.375617	0.177043	0.354362												METAP2,PA2G4,PEPD,XPNPEP1,XPNPEP2		MTHFR	MTHFR	Protein with MTHFR activity in vitro; null mutant has no phenotype and is prototrophic for methionine; MET13 encodes major isozyme of methylenetetrahydrofolate reductase (MTHFR)
YJL063C	MRPL8	11.1905	8.95205	-2.2384	0.00219149	0.0300244	-0.415729	0.183521	0.599249	0.0335131	0.153885										X		MRPL17	Mitochondrial ribosomal protein of the large subunit			Protein phosphatase that regulates the mating response; negatively regulates the MAP kinase signaling cascade during mating; member of the serine/threonine phosphatase PP1 family
YCR046C	IMG1	12.3036	7.70171	-4.6019	0.00436387	0.0423551	-11.08	-11.1371	-0.0571475	0.676107	0.621184										X		MRPL19	Mitochondrial ribosomal protein of the large subunit; required for respiration and for maintenance of the mitochondrial genome			Mitochondrial protein required for assembly of cytochrome bc1 complex; interacts with the Cbp3p-Cbp6p complex and newly synthesized cytochrome b (Cobp) to promote assembly of Cobp into the cytochrome bc1 complex
YEL050C	RML2	16.4032	10.2763	-6.12694	0.00185696	0.0272992	-12.0461	-10.0694	1.97678	0.231578	0.397347										X		MRPL2	Mitochondrial ribosomal protein of the large subunit (L2); has similarity to E. coli L2 ribosomal protein; mutant allele (fat21) causes inability to utilize oleate, and induce oleic acid oxidation; may interfere with activity of the Adr1p transcription factor		SMARCA1,SMARCA5	ATP-dependent DNA translocase involved in chromatin remodeling; ATPase component that, with Itc1p, forms a complex required for repression of a-specific genes, INO1, and early meiotic genes during mitotic growth; the Isw2 complex exhibits basal levels of chromatin binding throughout the genome as well as target-specific chromatin interactions; targeted by Ume6p- and Sua7p-dependent DNA looping to…
YJL096W	MRPL49	16.4004	10.1554	-6.245	2.00201e-06	0.000276896	-7.29127	-2.54499	4.74628	2.34376e-06	0.000208185										X		MRPL21	Mitochondrial ribosomal protein of the large subunit		CTSA	Vacuolar carboxypeptidase Y (proteinase C, CPY); broad-specificity C-terminal exopeptidase involved in non-specific protein degradation in the vacuole; involved, along with functional homolog Prc1p, in vacuolar zymogen activation, breakdown of the autophagic body, and autophagosome-dependent protein synthesis; role in phytochelatin synthesis; localizes to the vacuole lumen; member of the serine c…
YDR405W	MRP20	12.8084	7.53826	-5.27009	9.27491e-05	0.00508281	-8.5024	-5.40287	3.09953	0.000742169	0.0167728					X					X		MRPL23	Mitochondrial ribosomal protein of the large subunit		FGGY,GK,GK2,GK3P,GK5	Glycerol kinase; converts glycerol to glycerol-3-phosphate; glucose repression of expression is mediated by Adr1p and Ino2p-Ino4p; derepression of expression on non-fermentable carbon sources is mediated by Opi1p and Rsf1p
YMR193W	MRPL24	23.1867	13.0835	-10.1031	0.00119195	0.021482	-14.0648	-8.51578	5.54904	0.0177852	0.110458										X		MRPL28	Mitochondrial ribosomal protein of the large subunit; two mitochondrial ribosomal proteins, YmL14 and YmL24, have been assigned to the same gene			Transcription factor; activated by proteolytic processing in response to signals from the SPS sensor system for external amino acids; activates transcription of amino acid permease genes; STP2 has a paralog, STP1, that arose from the whole genome duplication
YMR286W	MRPL33	15.5003	10.3961	-5.10425	0.00374272	0.0395034	-8.38482	-5.28665	3.09817	0.0112149	0.0862										X		MRPL30	Mitochondrial ribosomal protein of the large subunit		GAPDH,GAPDHS	Glyceraldehyde-3-phosphate dehydrogenase (GAPDH), isozyme 3; involved in glycolysis and gluconeogenesis; tetramer that catalyzes the reaction of glyceraldehyde-3-phosphate to 1,3 bis-phosphoglycerate; detected in the cytoplasm and cell wall; GAPDH-derived antimicrobial peptides secreted by S. cerevisiae are active against a wide variety of wine-related yeasts and bacteria; binds AU-rich RNA
YCR003W	MRPL32	13.5954	9.13108	-4.46436	0.00477754	0.0453474	-12.6853	-11.1219	1.5634	0.180659	0.357572										X		MRPL32	Mitochondrial ribosomal protein of the large subunit; protein abundance increases in response to DNA replication stress		DAB2IP,RASA1,RASA2,RASA3,RASA4,RASA4B,RASAL1,RASAL2,RASAL3,SYNGAP1	GTPase activating factor for Rsr1p/Bud1p; plays a role in spindle position checkpoint distinct from its role in bud site selection; required for both axial and bipolar budding patterns; mutants exhibit random budding in all cell types; contains two PH-like domains
YDR322W	MRPL35	14.7792	10.5366	-4.24265	0.00338484	0.0375238	-4.76067	-1.97877	2.7819	0.000836045	0.0177087										X		MRPL38,PEBP1,PEBP4	Mitochondrial ribosomal protein of the large subunit			Cell fusion regulator; cytoplasmic protein localized to shmoo tip; required for alignment of parental nuclei before nuclear fusion during mating; contains a Dbl-homology domain; binds specifically with activated Cdc42p
YPR100W	MRPL51	-6.8977	-4.45344	2.44426	0.00161142	0.0254743	3.7817	3.19351	-0.588187	0.193598	0.367807								X		X		MRPL43,NDUFA2	Mitochondrial ribosomal protein of the large subunit
YNL252C	MRPL17	14.6685	9.71458	-4.95388	0.00382341	0.0397376	-8.99854	-5.88159	3.11694	0.0119494	0.0897944										X		MRPL46	Mitochondrial ribosomal protein of the large subunit		UBE2N,UBE2NL,UBE2T	E2 ubiquitin-conjugating enzyme; involved in the error-free DNA postreplication repair pathway; interacts with Mms2p to assemble ubiquitin chains at the Ub Lys-63 residue; DNA damage triggers redistribution from the cytoplasm to the nucleus
YLR439W	MRPL4	15.6389	9.76801	-5.87088	0.00287439	0.0344985	-11.3797	-8.33287	3.04685	0.335697	0.47109										X		MRPL47	Mitochondrial ribosomal protein of the large subunit; homolog of prokaryotic L29 ribosomal protein; located at the ribosomal tunnel exit	BLM, WRN	BLM,RECQL,RECQL4,RECQL5,WRN	RecQ family nucleolar DNA helicase; role in genome integrity maintenance, chromosome synapsis, meiotic joint molecule/crossover formation; stimulates activity of Top3p; rapidly lost in response to rapamycin in Rrd1p-dependent manner; forms nuclear foci upon DNA replication stress; yeast SGS1 complements mutations in human homolog BLM implicated in Bloom syndrome; also similar to human WRN implica…
YCR071C	IMG2	14.9081	11.4381	-3.46998	0.00186027	0.0272992	-8.24685	-5.85977	2.38708	0.0138422	0.0974275										X		MRPL49	Mitochondrial ribosomal protein of the large subunit; conserved in metazoa, with similarity to human mitochondrial ribosomal protein MRPL49			Mitochondrial 15S rRNA-binding protein; required for intron removal of COB and COX1 pre-mRNAs; has separable roles in stabilizing mitochondrial 15S rRNA and in maturation of the COB and COX1 mRNAs; contains pentatricopeptide repeat (PPR) motifs; mutant is respiratory deficient and has defective plasma membrane electron transport
YBR268W	MRPL37	11.191	8.08449	-3.10653	0.755019	0.613927	-10.8213	-6.54955	4.27173	0.00321115	0.0420975										X		MRPL54	Mitochondrial ribosomal protein of the large subunit		BAZ1A,BRD2,BRD3,BRD4,BRDT,CREBBP,EP300	Protein involved in transcription initiation; functions at TATA-containing promoters; associates with the basal transcription factor TFIID; contains two bromodomains; corresponds to the C-terminal region of mammalian TAF1; redundant with Bdf2p; BDF1 has a paralog, BDF2, that arose from the whole genome duplication
YPR166C	MRP2	14.4053	10.1716	-4.23365	0.00056901	0.0140058	-3.12736	-0.197247	2.93011	0.00244536	0.0359486										X		MRPS14	Mitochondrial ribosomal protein of the small subunit
YDR337W	MRPS28	14.3131	11.3336	-2.97946	0.00906701	0.0665349	-6.23989	-3.55122	2.68867	0.000379923	0.0113193						X				X		MRPS15	Mitochondrial ribosomal protein of the small subunit		PFDN2	Subunit of the heterohexameric cochaperone prefoldin complex; complex binds specifically to cytosolic chaperonin and transfers target proteins to it
YER050C	RSM18	13.4797	11.1983	-2.28136	0.00263803	0.0334591	-6.05695	-3.04517	3.01179	0.00185686	0.0308969										X		MRPS18A,MRPS18C	Mitochondrial ribosomal protein of the small subunit; has similarity to E. coli S18 ribosomal protein		HUNK,NUAK1,NUAK2,PRKAA2	S/T protein kinase; regulates polarized exocytosis and the Ire1p-mediated UPR; regulates HAC1 mRNA translocation, splicing and translation with KIN1 during ER stress; direct phosphorylation of Sec9p (S190) is enhanced by prior substrate priming (S192); localizes to the cytoplasmic face of the PM and sites of polarized growth; may regulate septin and cell wall organization; activation loop phospho…
YBL090W	MRP21	10.8308	7.3398	-3.49096	0.0831504	0.226356	-14.4081	-9.25017	5.15792	0.00192707	0.0313696					X					X		MRPS21	Mitochondrial ribosomal protein of the small subunit; MRP21 exhibits genetic interactions with mutations in the COX2 and COX3 mRNA 5'-untranslated leader sequences			Chorismate mutase; catalyzes the conversion of chorismate to prephenate to initiate the tyrosine/phenylalanine-specific branch of aromatic amino acid biosynthesis
YDR175C	RSM24	14.2648	11.2835	-2.98131	0.00273243	0.0338768	-11.8927	-9.23133	2.66134	0.0284491	0.1417										X		MRPS35	Mitochondrial ribosomal protein of the small subunit			Daughter cell-specific secreted protein with similarity to glucanases; degrades cell wall from the daughter side causing daughter to separate from mother
YKL003C	MRP17	11.5519	5.86366	-5.68826	0.00485321	0.0456185	-10.816	-12.3958	-1.57974	0.865909	0.67796										X		MRPS6	Mitochondrial ribosomal protein of the small subunit; MRP17 exhibits genetic interactions with PET122, encoding a COX3-specific translational activator	HLTF	HLTF	DNA helicase/Ubiquitin ligase; involved in error-free DNA damage tolerance (DDT), replication fork regression during postreplication repair by template switching, error-prone translesion synthesis; promotes synthesis of free and PCNA-bound polyubiquitin chains by Ubc13p-Mms2p; forms nuclear foci upon DNA replication stress; associates with native telomeres, cooperates with homologous recombinatio…
YJR113C	RSM7	16.9396	11.5103	-5.42935	4.4494e-05	0.00331365	-12.7249	-7.30062	5.42424	0.0035014	0.0442508										X		MRPS7	Mitochondrial ribosomal protein of the small subunit; has similarity to E. coli S7 ribosomal protein	POLH	POLH	DNA polymerase eta; involved in translesion synthesis during post-replication repair; catalyzes the synthesis of DNA opposite cyclobutane pyrimidine dimers and other lesions; involved in formation of post-replicative damage-induced genome-wide cohesion; may also have a role in protection against mitochondrial mutagenesis; mutations in human pol eta are responsible for XPV
YOR334W	MRS2	-0.41856	-0.988454	-0.569894	0.382543	0.467006	2.62637	1.95226	-0.674109	0.00316969	0.0419168										X		MRS2	Mitochondrial inner membrane Mg(2+) channel; required for maintenance of intramitochondrial Mg(2+) concentrations at the correct level to support splicing of group II introns; similar to bacterial CorA
YHR120W	MSH1	14.2788	8.76782	-5.51103	0.000354493	0.0111916	-7.51623	-5.3166	2.19962	0.168692	0.347384	X							X		X		MSH3	DNA-binding protein of the mitochondria; involved in repair of mitochondrial DNA; has ATPase activity and binds to DNA mismatches; has homology to E. coli MutS; transcription is induced during meiosis		NTHL1	DNA N-glycosylase and apurinic/apyrimidinic (AP) lyase; involved in base excision repair, localizes to the nucleus; sumoylated; NTG2 has a paralog, NTG1, that arose from the whole genome duplication
YMR097C	MTG1	17.5724	11.2963	-6.27605	0.0125302	0.0796365	-11.0767	-6.37462	4.7021	0.00212447	0.0331632										X		MTG1	Putative GTPase peripheral to the mitochondrial inner membrane; essential for respiratory competence, likely functions in assembly of the large ribosomal subunit, has homologs in plants and animals			Subunit of the SWI/SNF chromatin remodeling complex; involved in transcriptional regulation; functions interdependently in transcriptional activation with Snf2p and Snf5p; relocates to the cytosol under hypoxic conditions
YHR168W	MTG2	14.1528	9.08037	-5.07244	0.000174464	0.00756312	-4.13129	-1.97757	2.15371	0.00299965	0.0414795										X		MTG2	Putative GTPase; member of the Obg family; peripheral protein of the mitochondrial inner membrane that associates with the large ribosomal subunit; required for mitochondrial translation, possibly via a role in ribosome assembly		C11orf73	Protein with a possible role in phospholipid biosynthesis; null mutant displays an inositol-excreting phenotype that is suppressed by exogenous choline; protein abundance increases in response to DNA replication stress
YGR204W	ADE3	-1.65933	5.32486	6.98419	0.002216	0.0302176	-14.4304	-13.8438	0.586611	0.857202	0.675491												MTHFD1,MTHFD1L,MTHFD2,MTHFD2L	Cytoplasmic trifunctional enzyme C1-tetrahydrofolate synthase; involved in single carbon metabolism and required for biosynthesis of purines, thymidylate, methionine, and histidine; null mutation causes auxotrophy for adenine and histidine		MSH3	DNA-binding protein of the mitochondria; involved in repair of mitochondrial DNA; has ATPase activity and binds to DNA mismatches; has homology to E. coli MutS; transcription is induced during meiosis
YKR080W	MTD1	-3.15824	-0.172686	2.98556	7.34307e-05	0.00426558	-1.64355	-1.48536	0.158192	0.269111	0.429607												MTHFD2,MTHFD2L	NAD-dependent 5,10-methylenetetrahydrafolate dehydrogenase; plays a catalytic role in oxidation of cytoplasmic one-carbon units; expression is regulated by Bas1p and Bas2p, repressed by adenine, and may be induced by inositol and choline		RRM1	Major isoform of large subunit of ribonucleotide-diphosphate reductase; the RNR complex catalyzes rate-limiting step in dNTP synthesis, regulated by DNA replication and DNA damage checkpoint pathways via localization of small subunits; relative distribution to the nucleus increases upon DNA replication stress; RNR1 has a paralog, RNR3, that arose from the whole genome duplication
YGL143C	MRF1	15.4921	10.1219	-5.37019	6.48995e-05	0.00405201	-3.86685	-2.13483	1.73203	0.0115985	0.0878109										X		MTRF1,MTRF1L	Mitochondrial translation release factor; involved in stop codon recognition and hydrolysis of the peptidyl-tRNA bond during mitochondrial translation; lack of MRF1 causes mitochondrial genome instability		FTSJ2	Mitochondrial 2' O-ribose methyltransferase; required for methylation of U(2791) in 21S rRNA; MRM2 deletion confers thermosensitive respiration and loss of mitochondrial DNA; has similarity to Spb1p and Trm7p, and to E. coli FtsJ/RrmJ
YFR030W	MET10	0.379174	-0.128138	-0.507311	0.00538229	0.0483743	-0.0344832	-0.0612606	-0.0267774	0.291521	0.441674						X						MTRR	Subunit alpha of assimilatory sulfite reductase; complex converts sulfite into sulfide			Mitochondrial ribosomal protein of the large subunit; also involved in homologous recombination in mitochondria; required for recombination-dependent mtDNA partitioning; involved in stimulation of mitochondrial DNA replication in response to oxidative stress
YKL129C	MYO3	-0.060215	0.39757	0.457785	0.243277	0.383187	-0.285101	0.612075	0.897176	0.000154051	0.00598104						X						MYO15A,MYO1A,MYO1B,MYO1C,MYO1D,MYO1E,MYO1F,MYO1G,MYO1H,PLEKHH3,SCLT1	One of two type I myosins; localizes to actin cortical patches; deletion of MYO3 has little effect on growth, but myo3 myo5 double deletion causes severe defects in growth and actin cytoskeleton organization; MYO3 has a paralog, MYO5, that arose from the whole genome duplication			Nucleotide excision repair (NER) protein; binds damaged DNA during NER; binds DNA in an ATP-dependent manner (with Rad16p) during NER; required for repair of non-transcribed chromatin; subunit of Nucleotide Excision Repair Factor 4 (NEF4) and the Elongin-Cullin-Socs (ECS) ligase complex
YPL199C	YPL199C	0.876414	0.276734	-0.599681	0.00287126	0.0344985	-0.966611	-0.563816	0.402795	0.399492	0.510251												N4BP2L2
YER069W	ARG5,6	9.13866	7.71529	-1.42337	0.0167392	0.0955866	-4.67983	-2.74681	1.93302	2.32099e-07	2.92866e-05										X		NAGS	Acetylglutamate kinase and N-acetyl-gamma-glutamyl-phosphate reductase; N-acetyl-L-glutamate kinase (NAGK) catalyzes the 2nd and N-acetyl-gamma-glutamyl-phosphate reductase (NAGSA), the 3rd step in arginine biosynthesis; synthesized as a precursor which is processed in the mitochondrion to yield mature NAGK and NAGSA; enzymes form a metabolon complex with Arg2p; NAGK C-terminal domain stabilizes …			Protein of unknown function with possible role in spore wall assembly; predicted to contain an N-terminal transmembrane domain; osw5 null mutant spores exhibit increased spore wall permeability and sensitivity to beta-glucanase digestion
YAR014C	BUD14	1.1643	3.0033	1.839	0.00184784	0.0272992	-1.49173	-1.86255	-0.370814	0.400024	0.510499												NCKIPSD	Protein involved in bud-site selection; Bud14p-Glc7p complex is a cortical regulator of dynein; forms a complex with Kel1p and Kel2p that regulates Bnr1p (formin) to affect actin cable assembly, cytokinesis, and polarized growth; diploid mutants display a random budding pattern instead of the wild-type bipolar pattern; relative distribution to the nucleus increases upon DNA replication stress		CMBL	Cytoplasmic protein involved in mitochondrial function or organization; null mutant displays reduced frequency of mitochondrial genome loss; potential Hsp82p interactor
YKL162C	YKL162C	-1.64983	-1.36041	0.289415	0.684569	0.588523	1.16002	0.720569	-0.439453	0.00161648	0.0280093										X		NDUFAF7				Protein of unknown function; green fluorescent protein (GFP)-fusion protein localizes to the cytoplasm; phosphorylated in response to alpha factor; protein abundance increases in response to DNA replication stress
YER114C	BOI2	0.703733	0.72647	0.0227362	0.632084	0.574251	0.841081	-0.244051	-1.08513	0.00146653	0.0262791						X						NEB,NEBL	Protein implicated in polar growth, functionally redundant with Boi1p; interacts with bud-emergence protein Bem1p; contains an SH3 (src homology 3) domain and a PH (pleckstrin homology) domain; BOI2 has a paralog, BOI1, that arose from the whole genome duplication		ADCK2
YPL009C	RQC2	-0.86695	-1.43374	-0.566789	0.114178	0.266582	0.171172	-1.35911	-1.53029	9.26155e-05	0.00400675												NEMF	Component of RQC, which mediates nascent chain degradation; RQC (ribosome quality control complex) is a ribosome-bound complex required for degradation of polypeptides arising from stalled translation; recruits alanine- and threonine-charged tRNA to the A site and directs the elongation of nascent chains independently of mRNA or 40S subunits; monitors translation stress and signals this to Hsf1p
YOL043C	NTG2	-0.19711	0.0710825	0.268192	0.163879	0.322654	2.82976	1.94713	-0.882625	0.00176257	0.0297049	X											NTHL1	DNA N-glycosylase and apurinic/apyrimidinic (AP) lyase; involved in base excision repair, localizes to the nucleus; sumoylated; NTG2 has a paralog, NTG1, that arose from the whole genome duplication		ATP6V1E1,ATP6V1E2	Subunit E of the V1 domain of the vacuolar H+-ATPase (V-ATPase); V-ATPase is an electrogenic proton pump found throughout the endomembrane system; V1 domain has eight subunits; required for the V1 domain to assemble onto the vacuolar membrane; protein abundance increases in response to DNA replication stress
YOR163W	DDP1	-0.1393	-0.141932	-0.00263183	0.472088	0.513265	-1.02744	-0.400728	0.62671	0.00314323	0.0419168												NUDT10,NUDT11,NUDT3,NUDT4	Polyphosphate phosphatase; hydrolyzes diphosphorylated inositol polyphosphates and diadenosine polyphosphates; high specificity for diadenosine hexa- and pentaphosphates; contains endopolyphosphatase activity with a high affinity for polyphosphates, an activity also observed for its human DIPP homologs; possesses mRNA decapping activity; nudix hydrolase family member; protein abundance increases …
YDL116W	NUP84	-7.96852	-7.80285	0.165668	0.775652	0.62114	-6.25717	-8.57822	-2.32105	0.00080482	0.0177087	X	X										NUP107	Subunit of the Nup84p subcomplex of the nuclear pore complex (NPC); contributes to nucleocytoplasmic transport and NPC biogenesis; also plays roles in several processes that may require localization of genes or chromosomes at the nuclear periphery, including double-strand break repair, transcription and chromatin silencing; homologous to human NUP107	COQ5	COQ3,COQ5,WBSCR27	2-hexaprenyl-6-methoxy-1,4-benzoquinone methyltransferase; involved in ubiquinone (Coenzyme Q) biosynthesis; localizes to the matrix face of the mitochondrial inner membrane in a large complex with other ubiquinone biosynthetic enzymes; respiratory defect of the null mutant is partially complemented by human COQ5
YJL088W	ARG3	10.1105	8.48266	-1.62781	0.0239422	0.115515	-2.74514	-1.5819	1.16324	0.000893195	0.0184008												OTC	Ornithine carbamoyltransferase; also known as carbamoylphosphate:L-ornithine carbamoyltransferase; catalyzes the biosynthesis of the arginine precursor citrulline			Phosphopantetheine:protein transferase (PPTase); activates mitochondrial acyl carrier protein (Acp1p) by phosphopantetheinylation
YHL013C	OTU2	-1.81575	0.248585	2.06434	0.00159034	0.0253798	1.26477	1.54987	0.285103	0.894703	0.684644							X					OTUD1,OTUD6A,OTUD6B	Protein of unknown function; may interact with ribosomes, based on co-purification experiments; member of the ovarian tumor-like (OTU) superfamily of predicted cysteine proteases; shows cytoplasmic localization; protein abundance increases in response to DNA replication stress		GAPVD1,RABGEF1	Guanine nucleotide exchange factor (GEF); involved in vesicle-mediated vacuolar transport, including Golgi-endosome trafficking and sorting through the multivesicular body (MVB); specifically stimulates the intrinsic guanine nucleotide exchange activity of Rab family members (Vps21p/Ypt52p/Ypt53p); partially redundant with GEF VPS9; required for localization of the CORVET complex to endosomes; co…
YLR357W	RSC2	-3.93384	-2.85755	1.07629	0.439024	0.500251	-8.36976	-11.5585	-3.18875	0.000702106	0.0163765	X	X			X							PBRM1	Component of the RSC chromatin remodeling complex; required for expression of mid-late sporulation-specific genes; involved in telomere maintenance; RSC2 has a paralog, RSC1, that arose from the whole genome duplication		ARHGAP22,ARHGAP24,ARHGAP25,ARHGAP29,ARHGAP40,GMIP,HMHA1	GTPase activating protein (GAP) for Rho1p; regulator of a Tor2p-mediated, Rho1p GTPase switch that controls organization of the actin cytoskeleton; negative regulator of the RHO1-PKC1-MAPK cell integrity (CWI) and membrane fluidity homeostasis signaling pathways; potential Cdc28p substrate; SAC7 has a paralog, BAG7, that arose from the whole genome duplication
YEL060C	PRB1	3.21952	1.39282	-1.8267	0.00164095	0.0256432	0.169857	0.75916	0.589303	0.0300649	0.14429						X	X					PCSK9	Vacuolar proteinase B (yscB) with H3 N-terminal endopeptidase activity; serine protease of the subtilisin family; involved in protein degradation in the vacuole and required for full protein degradation during sporulation; activity inhibited by Pbi2p; protein abundance increases in response to DNA replication stress; PRB1 has a paralog, YSP3, that arose from the whole genome duplication			Monocarboxylate/proton symporter of the plasma membrane; transport activity is dependent on the pH gradient across the membrane; mediates high-affinity uptake of carbon sources lactate, pyuvate, and acetate, and also of the micronutrient selenite, whose structure mimics that of monocarboxylates; expression and localization are tightly regulated, with transcription repression, mRNA degradation, an…
YJR073C	OPI3	-11.5279	-7.17268	4.35525	0.00136399	0.023442	-4.23059	-6.0864	-1.85581	0.0083082	0.0716814										X		PEMT	Methylene-fatty-acyl-phospholipid synthase; catalyzes the last two steps in phosphatidylcholine biosynthesis; also known as phospholipid methyltransferase		RAD18	E3 ubiquitin ligase; forms heterodimer with Rad6p to monoubiquitinate PCNA-K164; heterodimer binds single-stranded DNA and has single-stranded DNA dependent ATPase activity; required for postreplication repair; SUMO-targeted ubiquitin ligase (STUbl) that contains a SUMO-interacting motif (SIM) which stimulates its ubiquitin ligase activity towards the sumoylated form of PCNA
YDR079W	PET100	18.3968	11.3232	-7.07358	0.000123927	0.00610078	-15.9481	-10.3202	5.62791	0.00716026	0.0664241										X		PET100	Chaperone that facilitates the assembly of cytochrome c oxidase; integral to the mitochondrial inner membrane; interacts with a subcomplex of subunits VII, VIIa, and VIII (Cox7p, Cox9p, and Cox8p) but not with the holoenzyme		DCPS	Non-essential hydrolase involved in mRNA decapping; activates Xrn1p; may function in a feedback mechanism to regulate deadenylation, contains pyrophosphatase activity and a HIT (histidine triad) motif; acts as inhibitor of neutral trehalase Nth1p; required for growth on glycerol medium; protein abundance increases in response to DNA replication stress; DCS1 has a paralog, DCS2, that arose from th…
YER058W	PET117	19.8664	7.38516	-12.4812	0.000237896	0.00889018	-12.5363	-11.5436	0.992786	0.542625	0.569194										X		PET117	Assembly factor that couples heme a synthesis to complex IV assembly; regulates the oligomerization state of the Cox15p heme a synthase, and couples this to the assembly of the cytochrome C oxidase complex (complex IV)			Subunit of a kinetochore-microtubule binding complex; complex bridges centromeric heterochromatin and kinetochore MAPs and motors; required for sister chromatid bi-orientation and kinetochore binding of SAC components; complex also includes Spc105p; modified by sumoylation
YDL065C	PEX19	-0.659915	-0.012302	0.647613	0.0389719	0.149135	-0.622922	-1.29733	-0.67441	0.00063199	0.0161565												PEX19	Chaperone and import receptor for newly-synthesized class I PMPs; binds peroxisomal membrane proteins (PMPs) in the cytoplasm and delivers them to the peroxisome for subsequent insertion into the peroxisomal membrane; interacts with Myo2p and contributes to peroxisome partitioning		COA4	Twin Cx(9)C protein involved in cytochrome c oxidase organization; organization includes assembly or stability; localizes to the mitochondrial intermembrane space via the Mia40p-Erv1p system; interacts genetically with CYC1 and with cytochrome c oxidase assembly factors
YDR329C	PEX3	-0.812656	0.90473	1.71739	0.0144687	0.0875916	-0.0304275	-0.692611	-0.662184	0.000836212	0.0177087												PEX3	Peroxisomal membrane protein (PMP); required for proper localization and stability of PMPs; anchors peroxisome retention factor Inp1p at the peroxisomal membrane; interacts with Pex19p		PPP1R3A,PPP1R3B,PPP1R3C,PPP1R3D,PPP1R3E,PPP1R3F,PPP1R3G	Regulatory subunit for Glc7p type-1 protein phosphatase (PP1); tethers Glc7p to Gsy2p glycogen synthase, binds Hsf1p heat shock transcription factor, required for induction of some HSF-regulated genes under heat shock; GAC1 has a paralog, PIG1, that arose from the whole genome duplication
YEL003W	GIM4	-1.92852	-0.783335	1.14519	0.0509227	0.17319	0.296115	-0.667865	-0.96398	0.00249624	0.0361698												PFDN2	Subunit of the heterohexameric cochaperone prefoldin complex; complex binds specifically to cytosolic chaperonin and transfers target proteins to it			Component of a heterodimeric Poc4p-Irc25p chaperone; involved in assembly of alpha subunits into the 20S proteasome; may regulate formation of proteasome isoforms with alternative subunits under different conditions; upregulates proteasome assembly in response to the unfolded protein response activated by mistargeting of proteins (UPRam)
YDR430C	CYM1	2.20855	1.04961	-1.15894	0.00281445	0.0344053	2.09399	2.50885	0.414867	0.316702	0.459332								X		X		PITRM1	Lysine-specific metalloprotease of the pitrilysin family; metalloprotease of the intermembrane space; degrades proteins and presequence peptides cleaved from imported proteins; required for normal mitochondrial morphology		RBBP4,RBBP7,RFWD2	Subunit of the Hat1p-Hat2p histone acetyltransferase complex; required for high affinity binding of the complex to free histone H4, thereby enhancing Hat1p activity; similar to human RbAp46 and 48; has a role in telomeric silencing
YKL213C	DOA1	-1.96262	-1.86513	0.0974812	0.879423	0.651934	-1.55269	-3.61295	-2.06026	0.0018865	0.0310488	X	X			X							PLAA	WD-repeat protein involved in ubiquitin-mediated protein degradation; Ub-binding protein with a role in Ub homeostasis; substrate-recruiting adaptor for Cdc48p in mitochondria-associated degradation; inhibits degradation of Ufd2p-dependent substrates; facilitates proteolysis of Cse4p, a centromeric H3-like protein; required for ribophagy; promotes NHEJ in postdiauxic/stationary phase; protein inc…			Regulatory subunit of type 1 protein phosphatase Glc7p; involved in negative regulation of glucose-repressible genes; involved in regulation of the nucleocytoplasmic shuttling of Hxk2p; REG1 has a paralog, REG2, that arose from the whole genome duplication
YBR129C	OPY1	2.23018	0.314133	-1.91605	1.48864e-08	4.80417e-06	-0.241672	1.03423	1.2759	0.00438003	0.0520169										X		PLEK,PLEK2	Protein of unknown function; overproduction blocks cell cycle arrest in the presence of mating pheromone; the authentic, non-tagged protein is detected in highly purified mitochondria in high-throughput studies			Mitochondrial protein required for the stability of Oli1p (Atp9p) mRNA; also required for the Oli1p ring formation; YMR098C is not an essential gene
YBL045C	COR1	9.88391	6.66361	-3.2203	0.000180915	0.00772743	-3.42949	-1.43228	1.99721	0.183686	0.359578										X		PMPCB,UQCRC1,UQCRC2	Core subunit of the ubiquinol-cytochrome c reductase complex; the ubiquinol-cytochrome c reductase complex (bc1 complex) is a component of the mitochondrial inner membrane electron transport chain		CLIP3,CLIP4,DCTN1,TBCB	Alpha-tubulin folding protein; similar to mammalian cofactor B; Alf1p-GFP localizes to cytoplasmic microtubules; required for the folding of alpha-tubulin and may play an additional role in microtubule maintenance
YJR043C	POL32	-3.2889	0.237745	3.52664	0.00503635	0.0467349	-2.75728	-5.59165	-2.83436	3.96654e-06	0.000324651	X	X	X	X		X	X					POLD3	Third subunit of DNA polymerase delta; involved in chromosomal DNA replication; required for error-prone DNA synthesis in the presence of DNA damage and processivity; forms a complex with Rev3p, Rev7p and Pol31p; interacts with Hys2p, PCNA (Pol30p), and Pol1p			Multidrug transporter of the major facilitator superfamily; member of the 12-spanner drug:H(+) antiporter DHA1 family; has a role in polyamine homeostasis; involved in spore wall asembly; sequence similarity to DTR1 and QDR1, and the triple mutant dtr1 qdr1 qdr3 exhibits reduced dityrosine fluorescence relative to the single mutants; expression is upregulated under polyamine stress; required for …
YFL036W	RPO41	14.8844	9.86346	-5.02094	0.00263718	0.0334591	-13.1057	-9.90782	3.19791	0.0298563	0.143782									X	X		POLRMT	Mitochondrial RNA polymerase; single subunit enzyme similar to those of T3 and T7 bacteriophages; requires a specificity subunit encoded by MTF1 for promoter recognition; Mtf1p interacts with and stabilizes the Rpo41p-promoter complex, enhancing DNA bending and melting to facilitate pre-initiation open complex formation; Rpo41p also synthesizes RNA primers for mitochondrial DNA replication	RHAG, RHCG		Ammonium permease of high capacity and low affinity; belongs to Mep-Amt-Rh family of well-conserved ammonium (NH4+) transporters that includes the human Rh factors; expression is under the nitrogen catabolite repression regulation ammonia permease activity regulated by TORC1 effectors, Npr1p and Par32p; MEP3 has a paralog, MEP1, that arose from the whole genome duplication
YBR173C	UMP1	-4.30044	-2.42619	1.87425	0.00375382	0.0395034	-1.05274	-2.00548	-0.952744	0.00236775	0.0357364	X											POMP	Chaperone required for correct maturation of the 20S proteasome; short-lived chaperone; may inhibit premature dimerization of proteasome half-mers; degraded by proteasome upon completion of its assembly		SERGEF	Protein required for modification of wobble nucleosides in tRNA; acts with Elongator complex, Kti11p, and Kti12p; has a potential role in regulatory interactions between microtubules and the cell cycle; forms a stable heterodimer with Kti11p
YAL023C	PMT2	1.95973	-0.214913	-2.17465	0.00274094	0.0338768	3.02158	3.7599	0.73832	0.127976	0.30207						X						POMT1,POMT2	Protein O-mannosyltransferase of the ER membrane; transfers mannose residues from dolichyl phosphate-D-mannose to protein serine/threonine residues; involved in ER quality control; acts in a complex with Pmt1p, can instead interact with Pmt5p; antifungal drug target; PMT2 has a paralog, PMT3, that arose from the whole genome duplication		MTHFD1,MTHFD1L,MTHFD2,MTHFD2L	Cytoplasmic trifunctional enzyme C1-tetrahydrofolate synthase; involved in single carbon metabolism and required for biosynthesis of purines, thymidylate, methionine, and histidine; null mutation causes auxotrophy for adenine and histidine
YMR300C	ADE4	6.84437	11.9335	5.0891	0.000396073	0.0115039	-14.8611	-11.2841	3.57704	0.0473665	0.186781												PPAT	Phosphoribosylpyrophosphate amidotransferase (PRPPAT); catalyzes first step of the 'de novo' purine nucleotide biosynthetic pathway; also known as amidophosphoribosyltransferase			Transporter of thiamine or related compound; contributes to uptake of 5-aminoimidazole-4-carboxamide-1-beta-D-ribofuranoside (acadesine); shares sequence similarity with Thi7p
YOR178C	GAC1	2.5395	5.37743	2.83793	0.000504489	0.0127416	1.62173	1.05369	-0.568046	0.605115	0.593812												PPP1R3A,PPP1R3B,PPP1R3C,PPP1R3D,PPP1R3E,PPP1R3F,PPP1R3G	Regulatory subunit for Glc7p type-1 protein phosphatase (PP1); tethers Glc7p to Gsy2p glycogen synthase, binds Hsf1p heat shock transcription factor, required for induction of some HSF-regulated genes under heat shock; GAC1 has a paralog, PIG1, that arose from the whole genome duplication
YIL153W	RRD1	1.40525	3.54864	2.14339	0.0026587	0.0335747	0.500501	1.07358	0.573083	0.479646	0.546477	X											PPP2R4	Peptidyl-prolyl cis/trans-isomerase; activator of the phosphotyrosyl phosphatase activity of PP2A; involved in G1 phase progression, microtubule dynamics, bud morphogenesis and DNA repair; required for rapid reduction of Sgs1p levels in response to rapamycin; subunit of the Tap42p-Sit4p-Rrd1p complex; protein increases in abundance and relative distribution to the nucleus increases upon DNA repli…		SLC25A26	S-adenosylmethionine transporter of the mitochondrial inner membrane; member of the mitochondrial carrier family; required for biotin biosynthesis and respiratory growth
YDR453C	TSA2	1.86178	0.52041	-1.34137	0.000226085	0.00875548	2.8007	2.7872	-0.0135085	0.948194	0.695186							X					PRDX1,PRDX2,PRDX3,PRDX4	Stress inducible cytoplasmic thioredoxin peroxidase; cooperates with Tsa1p in the removal of reactive oxygen, nitrogen and sulfur species using thioredoxin as hydrogen donor; deletion enhances the mutator phenotype of tsa1 mutants; protein abundance increases in response to DNA replication stress; TSA2 has a paralog, TSA1, that arose from the whole genome duplication		H2AFV,H2AFZ	Histone variant H2AZ; exchanged for histone H2A in nucleosomes by the SWR1 complex; involved in transcriptional regulation through prevention of the spread of silent heterochromatin; Htz1p-containing nucleosomes facilitate RNA Pol II passage by affecting correct assembly and modification status of RNA Pol II elongation complexes and by favoring efficient nucleosome remodeling
YLR109W	AHP1	1.50056	-0.0916512	-1.59221	2.10249e-05	0.00185051	1.31024	1.80028	0.49004	0.0683147	0.222692												PRDX5	Thiol-specific peroxiredoxin; reduces hydroperoxides to protect against oxidative damage; function in vivo requires covalent conjugation to Urm1p			Protein of unknown function; required for efficient 5' processing of mitochondrial tRNAs, for respiratory growth and mitochondrial genome maintenance; required for vacuolar acidification; localizes to the matrix side of the inner mitochondrial membrane
YBL064C	PRX1	-1.77627	-2.51697	-0.740709	0.000474383	0.0121933	2.53003	2.86323	0.333199	0.0234322	0.124983						X	X			X		PRDX6	Mitochondrial peroxiredoxin with thioredoxin peroxidase activity; has a role in reduction of hydroperoxides; reactivation requires Trr2p and glutathione; induced during respiratory growth and oxidative stress; phosphorylated; protein abundance increases in response to DNA replication stress		AQP1,AQP2,AQP4,AQP5,AQP6,AQP8,MIP	Spore-specific water channel; mediates the transport of water across cell membranes, developmentally controlled; may play a role in spore maturation, probably by allowing water outflow, may be involved in freeze tolerance
YDR185C	UPS3	-0.211095	-1.03516	-0.824068	0.00129946	0.0226414	0.0127673	0.424788	0.412021	0.151365	0.331448										X		PRELID1,PRELID2,PRELID3A,PRELID3B	Mitochondrial protein of unknown function; similar to Ups1p and Ups2p which are involved in regulation of mitochondrial cardiolipin and phosphatidylethanolamine levels; null is viable but interacts synthetically with ups1 and ups2 mutations; UPS3 has a paralog, UPS2, that arose from the whole genome duplication		RABIF	Guanine nucleotide dissociation stimulator for Sec4p; functions in the post-Golgi secretory pathway; binds zinc, found both on membranes and in the cytosol
YLR193C	UPS1	6.54828	4.55454	-1.99374	0.00407618	0.0412694	-3.28198	-2.1624	1.11958	0.0152117	0.102143										X		PRELID1,PRELID2,PRELID3A,PRELID3B	Phosphatidic acid transfer protein; plays a role in phospholipid metabolism by transporting phosphatidic acid from the outer to the inner mitochondrial membrane; localizes to the mitochondrial intermembrane space; null mutant has altered cardiolipin and phosphatidic acid levels; ortholog of human PRELI		DAP3	Mitochondrial ribosomal protein of the small subunit; has similarity to mammalian apoptosis mediator proteins; null mutation prevents induction of apoptosis by overproduction of metacaspase Mca1p
YER027C	GAL83	2.93567	1.41249	-1.52318	0.00281924	0.0344053	-0.924674	0.171177	1.09585	0.00254973	0.0365948												PRKAB1,PRKAB2	One of three possible beta-subunits of the Snf1 kinase complex; allows nuclear localization of the Snf1 kinase complex in the presence of a nonfermentable carbon source; necessary and sufficient for phosphorylation of the Mig2p transcription factor in response to alkaline stress; functionally redundant with SIP1 and SIP2 for the phosphorylation of Mig1p in response to glucose deprivation; contain…		DHTKD1,OGDH,OGDHL	Subunit of the mitochondrial alpha-ketoglutarate dehydrogenase complex; catalyzes a key step in the tricarboxylic acid (TCA) cycle, the oxidative decarboxylation of alpha-ketoglutarate to form succinyl-CoA
YKL166C	TPK3	-0.968233	0.180721	1.14895	0.0976423	0.246453	3.13295	2.01955	-1.1134	0.00234451	0.0356784												PRKACA,PRKACB,PRKACG,PRKG1,PRKG2,PRKX,PRKY,RPS6KA1,RPS6KA2,RPS6KA3,RPS6KA4,RPS6KA5,RPS6KA6,STK32A,STK32B,STK32C	cAMP-dependent protein kinase catalytic subunit; promotes vegetative growth in response to nutrients via the Ras-cAMP signaling pathway; partially redundant with Tpk1p and Tpk2p; localizes to P-bodies during stationary phase; TPK3 has a paralog, TPK1, that arose from the whole genome duplication			Vacuolar protein; presumably functions within the endosomal-vacuolar trafficking pathway, affecting events that determine whether plasma membrane proteins are degraded or routed to the plasma membrane; RCR2 has a paralog, RCR1, that arose from the whole genome duplication
YPL203W	TPK2	-2.20836	-0.956545	1.25182	0.00223662	0.030321	-1.63629	-3.10788	-1.47159	0.000762558	0.0171059							X					PRKACA,PRKACB,PRKACG,PRKG1,PRKG2,PRKX,PRKY,RPS6KA1,RPS6KA2,RPS6KA3,RPS6KA4,RPS6KA5,RPS6KA6,STK32A,STK32B,STK32C	cAMP-dependent protein kinase catalytic subunit; promotes vegetative growth in response to nutrients via the Ras-cAMP signaling pathway; partially redundant with Tpk1p and Tpk3p; localizes to P-bodies during stationary phase; relocalizes to the cytosol in response to hypoxia
YGL115W	SNF4	6.13076	2.06903	-4.06173	0.00333136	0.0373587	-3.78497	-0.767416	3.01755	0.0368491	0.162573												PRKAG1,PRKAG2,PRKAG3	Activating gamma subunit of the AMP-activated Snf1p kinase complex; additional subunits of the complex are Snf1p and a Sip1p/Sip2p/Gal83p family member; activates glucose-repressed genes, represses glucose-induced genes; role in sporulation, and peroxisome biogenesis; protein abundance increases in response to DNA replication stress		CNOT4	Ubiquitin-protein ligase subunit of the CCR4-NOT complex; with Ubc4p, ubiquitinates nascent polypeptide-associated complex subunits and histone demethyase Jhd2p; CCR4-NOT has roles in transcription regulation, mRNA degradation, and post-transcriptional modifications; regulates levels of DNA Polymerase-{alpha} to promote efficient and accurate DNA replication
YML092C	PRE8	3.72638	2.16518	-1.5612	0.000420939	0.0118419	0.384307	1.14488	0.76057	0.141076	0.319792												PSMA2	Alpha 2 subunit of the 20S proteasome	SRPK1	SRPK1,SRPK2,SRPK3	SR protein kinase (SRPK); involved in regulating proteins involved in mRNA metabolism and cation homeostasis; similar to human SRPK1
YHR189W	PTH1	9.34032	6.00907	-3.33125	0.000767631	0.0158845	-4.02659	-0.941335	3.08526	0.000225524	0.00776098						X				X		PTRH1	One of two mitochondrially-localized peptidyl-tRNA hydrolases; dispensable for respiratory growth on rich medium, but required for respiratory growth on minimal medium; see also PTH2		PLEK,PLEK2	Protein of unknown function; overproduction blocks cell cycle arrest in the presence of mating pheromone; the authentic, non-tagged protein is detected in highly purified mitochondria in high-throughput studies
YKL033W-A	YKL033W-A	-0.326671	-1.80974	-1.48307	0.00311146	0.0360049	-1.20377	-1.14773	0.0560396	0.640262	0.608118												PUDP			RAD52	Protein that stimulates strand exchange; stimulates strand exchange by facilitating Rad51p binding to single-stranded DNA; anneals complementary single-stranded DNA; involved in the repair of double-strand breaks in DNA during vegetative growth and meiosis and UV induced sister chromatid recombination
YLL013C	PUF3	2.27785	1.44468	-0.833171	0.000940647	0.0185857	0.83383	0.895281	0.0614506	0.925308	0.690868										X		PUM1,PUM2	Protein of the mitochondrial outer surface; links the Arp2/3 complex with the mitochore during anterograde mitochondrial movement; also binds to and promotes degradation of mRNAs for select nuclear-encoded mitochondrial proteins		RPL26,RPL26L1	Ribosomal 60S subunit protein L26B; binds to 5.8S rRNA; non-essential even when paralog is also deleted; deletion has minimal affections on ribosome biosynthesis; homologous to mammalian ribosomal protein L26 and bacterial L24; RPL26B has a paralog, RPL26A, that arose from the whole genome duplication
YDR496C	PUF6	-6.72637	-2.38442	4.34195	0.0186811	0.100109	-5.93081	-7.9944	-2.06359	0.00324367	0.0423405					X		X					PUM3	Pumilio-homology domain protein; binds the 3' UTR of ASH1 mRNA and represses its translation, resulting in proper asymmetric localization of ASH1 mRNA; required at post-transcriptional step for efficient retrotransposition; absence results in decreased Ty1 Gag:GFP protein levels; co-sediments with the 60S ribosomal subunit and is required for its biogenesis		MRPL19	Mitochondrial ribosomal protein of the large subunit; required for respiration and for maintenance of the mitochondrial genome
YNL093W	YPT53	1.54199	0.618805	-0.923189	0.00070115	0.0153119	0.919997	1.63347	0.71347	0.00196814	0.0313696												RAB17,RAB20,RAB22A,RAB24,RAB31,RAB5A,RAB5B,RAB5C	Stress-induced Rab family GTPase; required for vacuolar protein sorting and endocytosis; involved in ionic stress tolerance; similar to Vps21p and Ypt52p; functional homolog of Vps21p; mammalian Rab5 homolog; YPT53 has a paralog, VPS21, that arose from the whole genome duplication		PRKACA,PRKACB,PRKACG,PRKG1,PRKG2,PRKX,PRKY,RPS6KA1,RPS6KA2,RPS6KA3,RPS6KA4,RPS6KA5,RPS6KA6,STK32A,STK32B,STK32C	cAMP-dependent protein kinase catalytic subunit; promotes vegetative growth in response to nutrients via the Ras-cAMP signaling pathway; partially redundant with Tpk1p and Tpk3p; localizes to P-bodies during stationary phase; relocalizes to the cytosol in response to hypoxia
YPR017C	DSS4	1.06166	0.0829859	-0.978678	0.0461171	0.16415	3.18863	4.73253	1.5439	0.0024706	0.0361193												RABIF	Guanine nucleotide dissociation stimulator for Sec4p; functions in the post-Golgi secretory pathway; binds zinc, found both on membranes and in the cytosol
YER173W	RAD24	-0.807369	4.40198	5.20935	5.89355e-07	0.000106986	-1.0927	-4.0467	-2.954	4.4695e-08	7.51957e-06	X		X		X							RAD17	Checkpoint protein; involved in the activation of the DNA damage and meiotic pachytene checkpoints; subunit of a clamp loader that loads Rad17p-Mec3p-Ddc1p onto DNA; homolog of human and S. pombe Rad17 protein			Mitochondrial inner membrane protein with similarity to Mdm31p; required for normal mitochondrial morphology and inheritance; interacts genetically with MMM1, MDM10, MDM12, and MDM34; variation between SK1 and S288C at residues 182 and 262 impacts invasive growth and mitochondrial network structure
YCR066W	RAD18	-3.07332	10.1844	13.2577	3.11281e-11	8.03507e-08	-1.37288	-14.0822	-12.7094	2.94735e-13	4.46281e-10	X			X	X							RAD18	E3 ubiquitin ligase; forms heterodimer with Rad6p to monoubiquitinate PCNA-K164; heterodimer binds single-stranded DNA and has single-stranded DNA dependent ATPase activity; required for postreplication repair; SUMO-targeted ubiquitin ligase (STUbl) that contains a SUMO-interacting motif (SIM) which stimulates its ubiquitin ligase activity towards the sumoylated form of PCNA			Protein involved in 5' RNA end processing; substrates include mitochondrial COB, 15S_rRNA, and RPM1 transcripts; may also have a role in 3' end processing of the COB pre-mRNA; displays genetic interaction with cell cycle-regulated kinase Dbf2p
YEL037C	RAD23	1.3341	-0.526586	-1.86068	0.00620335	0.0522695	-0.123256	-2.83188	-2.70863	4.13221e-05	0.00222932			X		X					X		RAD23A,RAD23B	Protein with ubiquitin-like N terminus; subunit of Nuclear Excision Repair Factor 2 (NEF2) with Rad4p that binds damaged DNA; enhances protein deglycosylation activity of Png1p; also involved, with Rad4p, in ubiquitylated protein turnover; Rad4p-Rad23p heterodimer binds to promoters of DNA damage response genes to repress their transcription in the absence of DNA damage		DDX3X,DDX3Y,DDX46	Double-stranded DNA-dependent helicase of the DExH/D-box family; required for maintenance of the mitochondrial (mt) genome; null mutant accumulates double-stranded breaks in mt DNA; localizes to the mt matrix
YNL250W	RAD50	-10.3846	0.821317	11.2059	4.56292e-09	1.65662e-06	-7.73959	-15.5968	-7.85722	2.10884e-07	2.90286e-05	X	X			X					X		RAD50	Subunit of MRX complex with Mre11p and Xrs2p; complex is involved in processing double-strand DNA breaks in vegetative cells, initiation of meiotic DSBs, telomere maintenance, and nonhomologous end joining; forms nuclear foci upon DNA replication stress		TMEM64	Integral membrane protein; localized to late Golgi vesicles along with the v-SNARE Tlg2p; required for asymmetric localization of Kar9p during mitosis; GFP-fusion protein localizes to the cytoplasm in a punctate pattern
YER095W	RAD51	-5.92738	-3.72344	2.20394	0.0102982	0.0703789	-6.06193	-11.5449	-5.48302	2.93751e-05	0.00167941	X	X			X	X				X		RAD51,RAD51B,RAD51C,RAD51D	Strand exchange protein; forms a helical filament with DNA that searches for homology; involved in the recombinational repair of double-strand breaks in DNA during vegetative growth and meiosis; homolog of Dmc1p and bacterial RecA protein			Component of the Ctf19 complex and the COMA subcomplex; involved in kinetochore-microtubule mediated chromosome segregation; binds to centromere DNA; orthologous to human centromere constitutive-associated network (CCAN) subunit CENP-H and fission yeast fta3
YDR004W	RAD57	-7.48213	-5.87194	1.61019	0.0909525	0.238912	-3.80678	-9.47313	-5.66635	9.82706e-07	9.01813e-05	X	X			X							RAD51B,RAD51D,XRCC3	Protein that stimulates strand exchange; stimulates strand exchange by stabilizing the binding of Rad51p to single-stranded DNA; involved in the recombinational repair of double-strand breaks in DNA during vegetative growth and meiosis; forms heterodimer with Rad55p		RNF212,RNF212B	SUMO E3 ligase; required for synaptonemal complex formation; localizes to synapsis initiation sites on meiotic chromosomes; associates with centromeres early in meiosis, then with chromosome axes and finally with double-strand break sites that are engaged in repair by crossovers; potential Cdc28p substrate
YDR076W	RAD55	-3.87871	-2.37941	1.4993	0.0591464	0.186729	-3.27026	-8.14015	-4.86989	4.72749e-08	7.53501e-06	X	X			X							RAD51D	Protein that stimulates strand exchange; stimulates strand exchange by stabilizing the binding of Rad51p to single-stranded DNA; involved in the recombinational repair of double-strand breaks in DNA during vegetative growth and meiosis; forms heterodimer with Rad57p		DDX1,DDX3X,DDX3Y,DDX4,DDX41,DDX46	Putative ATP-dependent RNA helicase of the DEAD-box protein family; mutants show reduced stability of the 40S ribosomal subunit scanning through 5' untranslated regions of mRNAs; protein abundance increases in response to DNA replication stress; DBP1 has a paralog, DED1, that arose from the whole genome duplication
YDL059C	RAD59	-0.810891	-1.02551	-0.214623	0.177581	0.331262	2.74572	1.29752	-1.44821	0.000275581	0.00887826	X	X			X					X		RAD52	Protein involved DNA double-strand break repair; repairs breaks in DNA during vegetative growth via recombination and single-strand annealing; anneals complementary single-stranded DNA; forms nuclear foci upon DNA replication stress; required for loading of Rad52p to DSBs; regulates replication fork progression in DNA ligase I-deficient cells; paralog of Rad52p		CS	Citrate synthase; catalyzes the condensation of acetyl coenzyme A and oxaloacetate to form citrate; the rate-limiting enzyme of the TCA cycle; nuclear encoded mitochondrial protein; CIT1 has a paralog, CIT2, that arose from the whole genome duplication
YML032C	RAD52	-10.0579	1.40484	11.4627	0.00119817	0.021482	-7.61264	-13.1811	-5.56847	8.90722e-05	0.00390931	X	X		X	X							RAD52	Protein that stimulates strand exchange; stimulates strand exchange by facilitating Rad51p binding to single-stranded DNA; anneals complementary single-stranded DNA; involved in the repair of double-strand breaks in DNA during vegetative growth and meiosis and UV induced sister chromatid recombination			Component of Shu complex (aka PCSS complex); Shu complex also includes Psy3, Csm2, Shu2, and promotes error-free DNA repair, mediates inhibition of Srs2p function; essential for promoting the establishment of homolog bias during meiotic homologous recombination; promotes both crossover (CO) and non-crossover (NCO) pathways of meiotic recombination and formation of Rad51p filaments
YBR073W	RDH54	0.0172503	0.532473	0.515223	0.126011	0.280244	-1.17626	-2.43226	-1.256	5.53166e-06	0.000429534	X					X						RAD54B,TTF2	DNA-dependent ATPase; DNA recombination/repair translocase, supercoils DNA and promotes DNA strand opening; stimulates strand exchange by modifying dsDNA topology; involved in recombinational repair of DNA double-strand breaks (DSBs) during mitosis and meiosis; phosphorylated in Mec1p-, Rad53p-dependent way in response to one DSB; contributes to remodelling of nucleosomes; proposed to be involved…			Zinc cluster protein proposed to be a transcriptional regulator; regulator involved in the stress response; null mutants have a respiratory deficiency, calcofluor white sensitivity and slightly increased cycloheximide resistance
YPL194W	DDC1	-0.0192559	4.52303	4.54228	8.29929e-11	8.03507e-08	-1.16987	-4.38668	-3.21682	1.47652e-08	2.63025e-06	X				X							RAD9A,RAD9B	DNA damage checkpoint protein; part of a PCNA-like complex required for DNA damage response, required for pachytene checkpoint to inhibit cell cycle in response to unrepaired recombination intermediates; potential Cdc28p substrate; forms nuclear foci upon DNA replication stress
YPR049C	ATG11	-0.243011	1.27452	1.51754	0.00297992	0.0352414	-1.43729	-1.88479	-0.447494	0.181067	0.357922												RB1CC1	Adapter protein for pexophagy and the Cvt targeting pathway; directs receptor-bound cargo to the phagophore assembly site (PAS) for packaging into vesicles; required for recruiting other proteins to the PAS; recruits Dnm1p to facilitate fission of mitochondria that are destined for removal by mitophagy		ABCG1,ABCG4,ABCG8	Putative ABC transporter
YEL056W	HAT2	-0.939588	-1.3013	-0.361713	0.366209	0.461653	1.85981	1.2293	-0.630508	0.00195336	0.0313696												RBBP4,RBBP7,RFWD2	Subunit of the Hat1p-Hat2p histone acetyltransferase complex; required for high affinity binding of the complex to free histone H4, thereby enhancing Hat1p activity; similar to human RbAp46 and 48; has a role in telomeric silencing		HMG20A,HMG20B,SMARCE1,SP110,SP140,SP140L,TFAM,UBTF,UBTFL1,UBTFL6	Transcriptional repressor that regulates hypoxic genes during normoxia; involved in the aerobic repression of genes such as COX5b, TIR1, and HEM13; binds DNA intrastrand cross-links formed by cisplatin; HMG (high mobility group box) domain containing protein which binds and bends cisplatin-modified DNA, blocking excision repair; IXR1 has a paralog, ABF2, that arose from the whole genome duplicati…
YIR005W	IST3	-3.98862	-2.19331	1.79531	0.00410946	0.0414123	-0.934613	-1.11809	-0.183475	0.494142	0.551179												RBMX2	Component of the U2 snRNP; required for the first catalytic step of splicing and for spliceosomal assembly; interacts with Rds3p and is required for Mer1p-activated splicing; diploid mutants have a specific defect in MATa1 pre-mRNA splicing which leads to haploid gene expression in diploids		GDE1	Phosphatidylglycerol phospholipase C; regulates phosphatidylglycerol (PG) accumulation via a phospholipase C-type degradation mechanism; PG levels affect mitochondrial function; contains glycerophosphodiester phosphodiesterase motifs
YLR394W	CST9	2.06052	0.508103	-1.55242	2.78444e-05	0.00228179	-1.02835	-0.436827	0.591522	0.0431004	0.177825												RNF212,RNF212B	SUMO E3 ligase; required for synaptonemal complex formation; localizes to synapsis initiation sites on meiotic chromosomes; associates with centromeres early in meiosis, then with chromosome axes and finally with double-strand break sites that are engaged in repair by crossovers; potential Cdc28p substrate		SMYD2,SMYD3	Methyltransferase involved in methylation of histone H4 Lys5, -8, -12; S-adenosylmethionine-dependent; zinc-finger protein, contains one canonical and two unusual fingers in unusual arrangements; deletion enhances replication of positive-strand RNA virus
YER116C	SLX8	-2.0246	7.00856	9.03316	1.59513e-06	0.000256706	-5.87027	-10.5732	-4.70297	2.27437e-05	0.00137752	X				X							RNF222,RNF4	Subunit of Slx5-Slx8 SUMO-targeted ubiquitin ligase (STUbL) complex; role in proteolysis of spindle positioning protein Kar9, DNA repair proteins Rad52p and Rad57p; stimulated by SUMO-modified substrates; contains a C-terminal RING domain; forms nuclear foci upon DNA replication stress; required for maintenance of genome integrity like human ortholog RNF			Putative cysteine synthase; localized to the mitochondrial outer membrane
YGL135W	RPL1B	14.9898	5.82875	-9.1611	0.00257966	0.0333004	-18.4832	-18.3002	0.182998	0.872567	0.679683							X					RPL10A	Ribosomal 60S subunit protein L1B; N-terminally acetylated; homologous to mammalian ribosomal protein L10A and bacterial L1; RPL1B has a paralog, RPL1A, that arose from the whole genome duplication; rpl1a rpl1b double null mutation is lethal		MTRF1,MTRF1L	Mitochondrial translation release factor; involved in stop codon recognition and hydrolysis of the peptidyl-tRNA bond during mitochondrial translation; lack of MRF1 causes mitochondrial genome instability
YGR034W	RPL26B	-1.1524	-1.34262	-0.190221	0.269409	0.401486	-1.08311	-2.04975	-0.966643	0.00238372	0.0357364							X					RPL26,RPL26L1	Ribosomal 60S subunit protein L26B; binds to 5.8S rRNA; non-essential even when paralog is also deleted; deletion has minimal affections on ribosome biosynthesis; homologous to mammalian ribosomal protein L26 and bacterial L24; RPL26B has a paralog, RPL26A, that arose from the whole genome duplication		MRPL54	Mitochondrial ribosomal protein of the large subunit
YJR094W-A	RPL43B	-2.03572	-1.94223	0.0934852	0.911625	0.658074	-1.21877	0.399575	1.61835	0.000108841	0.00451519							X					RPL37A	Ribosomal 60S subunit protein L43B; homologous to mammalian ribosomal protein L37A, no bacterial homolog; RPL43B has a paralog, RPL43A, that arose from the whole genome duplication; protein abundance increases in response to DNA replication stress		RAD23A,RAD23B	Protein with ubiquitin-like N terminus; subunit of Nuclear Excision Repair Factor 2 (NEF2) with Rad4p that binds damaged DNA; enhances protein deglycosylation activity of Png1p; also involved, with Rad4p, in ubiquitylated protein turnover; Rad4p-Rad23p heterodimer binds to promoters of DNA damage response genes to repress their transcription in the absence of DNA damage
YOR293W	RPS10A	-1.99416	-0.873003	1.12116	0.674974	0.586179	0.545216	-0.232951	-0.778167	0.00352153	0.0442508							X					RPS10,RPS10-NUDT3,RPS10P5	Protein component of the small (40S) ribosomal subunit; homologous to mammalian ribosomal protein S10, no bacterial homolog; RPS10A has a paralog, RPS10B, that arose from the whole genome duplication; mutations in the human homolog associated with Diamond-Blackfan anemia		SLC2A10,SLC2A12,SLC2A6,SLC2A8
YNR037C	RSM19	15.1261	9.92002	-5.20607	0.00178374	0.026998	-7.78857	-4.03129	3.75728	0.0585948	0.206506										X		RPS15	Mitochondrial ribosomal protein of the small subunit; has similarity to E. coli S19 ribosomal protein	CTPS1, CTPS2	CTPS1,CTPS2	Major CTP synthase isozyme (see also URA8); catalyzes the ATP-dependent transfer of the amide nitrogen from glutamine to UTP, forming CTP, the final step in de novo biosynthesis of pyrimidines; involved in phospholipid biosynthesis; capable of forming cytoplasmic filaments termed cytoophidium, especially during conditions of glucose depletion; URA7 has a paralog, URA8, that arose from the whole g…
YDR447C	RPS17B	-0.18477	-0.746899	-0.562129	0.0474405	0.166338	0.201637	1.05236	0.85072	0.000374873	0.0113193							X					RPS17	Ribosomal protein 51 (rp51) of the small (40s) subunit; homologous to mammalian ribosomal protein S17, no bacterial homolog; RPS17B has a paralog, RPS17A, that arose from the whole genome duplication; protein abundance increases in response to DNA replication stress		HDAC6	Trichostatin A-insensitive homodimeric histone deacetylase (HDAC); specificity in vitro for histones H3, H4, H2A, and H2B; similar to Hda1p, Rpd3p, Hos1p, and Hos2p; deletion results in increased histone acetylation at rDNA repeats
YML063W	RPS1B	-1.69509	0.366863	2.06195	0.00102995	0.0198111	-1.67144	-1.32811	0.343329	0.50037	0.554006							X					RPS3A	Ribosomal protein of the small (40S) subunit; homologous to mammalian ribosomal protein S3A, no bacterial homolog; RPS1B has a paralog, RPS1A, that arose from the whole genome duplication			Phospholipid-binding hydrophilin; essential to overcome desiccation-rehydration process; expression is induced by osmotic stress; SIP18 has a paralog, GRE1, that arose from the whole genome duplication
YBL072C	RPS8A	-3.29409	-0.7826	2.51149	0.000611003	0.0147128	-1.5138	-2.30471	-0.790904	0.185706	0.360503							X					RPS8	Protein component of the small (40S) ribosomal subunit; homologous to mammalian ribosomal protein S8, no bacterial homolog; RPS8A has a paralog, RPS8B, that arose from the whole genome duplication		OTC	Ornithine carbamoyltransferase; also known as carbamoylphosphate:L-ornithine carbamoyltransferase; catalyzes the biosynthesis of the arginine precursor citrulline
YER070W	RNR1	11.5612	2.64403	-8.91716	0.000376875	0.0113083	-19.1837	-18.3179	0.865793	0.532567	0.564554						X	X					RRM1	Major isoform of large subunit of ribonucleotide-diphosphate reductase; the RNR complex catalyzes rate-limiting step in dNTP synthesis, regulated by DNA replication and DNA damage checkpoint pathways via localization of small subunits; relative distribution to the nucleus increases upon DNA replication stress; RNR1 has a paralog, RNR3, that arose from the whole genome duplication		LEO1	Component of the Paf1 complex; which associates with RNA polymerase II and is involved in histone methylation; plays a role in regulating Ty1 transposition; involved in transcription elongation as demonstrated by the G-less-based run-on (GLRO) assay
YGL244W	RTF1	-6.05439	-6.95391	-0.899523	0.181406	0.333899	-3.88499	-6.89598	-3.01099	0.00103136	0.0202812	X		X		X							RTF1	Subunit of RNAPII-associated chromatin remodeling Paf1 complex; regulates gene expression by directing cotranscriptional histone modification, influences transcription and chromatin structure through several independent functional domains; directly or indirectly regulates DNA-binding properties of Spt15p and relative activities of different TATA elements; involved in transcription elongation as d…		MRPL32	Mitochondrial ribosomal protein of the large subunit; protein abundance increases in response to DNA replication stress
YDR178W	SDH4	7.10142	4.95641	-2.14501	0.000364977	0.0112163	-1.79849	-0.366178	1.43231	0.000381253	0.0113193										X		SDHD	Membrane anchor subunit of succinate dehydrogenase (SDH); involved in coupling the oxidation of succinate to the transfer of electrons to ubiquinone as part of the TCA cycle and the mitochondrial respiratory chain; has similarity to human SDH subunit D (SDHD), which is implicated in paraganglioma		DIS3L2	3'-5' exoribonuclease; component of the mitochondrial degradosome along with the ATP-dependent RNA helicase Suv3p; the degradosome associates with the ribosome and mediates turnover of aberrant or unprocessed RNAs
YAL020C	ATS1	-0.75523	0.799503	1.55473	0.00414908	0.0414123	-0.923323	-0.520186	0.403137	0.444886	0.531679												SERGEF	Protein required for modification of wobble nucleosides in tRNA; acts with Elongator complex, Kti11p, and Kti12p; has a potential role in regulatory interactions between microtubules and the cell cycle; forms a stable heterodimer with Kti11p		ACO1,ACO2,IREB2	Putative mitochondrial aconitase isozyme; similarity to Aco1p, an aconitase required for the TCA cycle; expression induced during growth on glucose, by amino acid starvation via Gcn4p, and repressed on ethanol
YER177W	BMH1	-4.36726	-2.72374	1.64352	0.00752149	0.0591195	0.430903	-2.66656	-3.09746	9.80416e-08	1.48452e-05	X											SFN,YWHAB,YWHAE,YWHAG,YWHAH,YWHAQ,YWHAZ	14-3-3 protein, major isoform; controls proteome at post-transcriptional level, binds proteins and DNA, involved in regulation of exocytosis, vesicle transport, Ras/MAPK and rapamycin-sensitive signaling, aggresome formation, spindle position checkpoint; protein increases in abundance and relative distribution to the nucleus increases upon DNA replication stress; antiapoptotic gene similar to hum…		HUS1,HUS1B	DNA damage and meiotic pachytene checkpoint protein; subunit of a heterotrimeric complex (Rad17p-Mec3p-Ddc1p) that forms a sliding clamp, loaded onto partial duplex DNA by a clamp loader complex; homolog of human and S. pombe Hus1
YNL003C	PET8	15.1011	10.993	-4.10807	0.00424919	0.0418364	-7.30868	-5.7976	1.51109	0.888359	0.684063						X				X		SLC25A26	S-adenosylmethionine transporter of the mitochondrial inner membrane; member of the mitochondrial carrier family; required for biotin biosynthesis and respiratory growth		EIF4B,EIF4H	Translation initiation factor eIF-4B; contains an RNA recognition motif and binds to single-stranded RNA; has RNA annealing activity; interacts with Rps20p at the head of the 40S ribosomal subunit and alters the structure of the mRNA entry channel
YFL040W	YFL040W	0.796912	0.641545	-0.155367	0.530509	0.537446	0.525221	-0.260526	-0.785747	0.00162882	0.0280093												SLC2A10,SLC2A12,SLC2A6,SLC2A8			MTRR	Subunit alpha of assimilatory sulfite reductase; complex converts sulfite into sulfide
YBL089W	AVT5	8.46943	5.02667	-3.44277	1.89109e-05	0.00179769	-3.67875	-1.19502	2.48373	0.0296959	0.143428					X							SLC38A1,SLC38A10,SLC38A2,SLC38A3,SLC38A4,SLC38A5,SLC38A6,SLC38A7,SLC38A8	Putative transporter; member of a family of seven S. cerevisiae genes (AVT1-7) related to vesicular GABA-glycine transporters; AVT5 has a paralog, AVT6, that arose from the whole genome duplication			Mitochondrial ornithine acetyltransferase; catalyzes the fifth step in arginine biosynthesis; also possesses acetylglutamate synthase activity, regenerates acetylglutamate while forming ornithine
YHL016C	DUR3	0.981635	-0.495574	-1.47721	2.90674e-05	0.00228179	-0.108164	1.40198	1.51014	5.66377e-09	1.28321e-06												SLC5A12,SLC5A5,SLC5A6,SLC5A8	Plasma membrane transporter for both urea and polyamines; expression is highly sensitive to nitrogen catabolite repression and induced by allophanate, the last intermediate of the allantoin degradative pathway		MYO15A,MYO1A,MYO1B,MYO1C,MYO1D,MYO1E,MYO1F,MYO1G,MYO1H,PLEKHH3,SCLT1	One of two type I myosins; localizes to actin cortical patches; deletion of MYO3 has little effect on growth, but myo3 myo5 double deletion causes severe defects in growth and actin cytoskeleton organization; MYO3 has a paralog, MYO5, that arose from the whole genome duplication
YOR304W	ISW2	-1.08247	2.99413	4.0766	4.22983e-07	8.77537e-05	2.01556	-0.514098	-2.52966	2.46361e-06	0.000208185								X				SMARCA1,SMARCA5	ATP-dependent DNA translocase involved in chromatin remodeling; ATPase component that, with Itc1p, forms a complex required for repression of a-specific genes, INO1, and early meiotic genes during mitotic growth; the Isw2 complex exhibits basal levels of chromatin binding throughout the genome as well as target-specific chromatin interactions; targeted by Ume6p- and Sua7p-dependent DNA looping to…		METAP2,PA2G4,PEPD,XPNPEP1,XPNPEP2
YHR207C	SET5	0.132084	1.57308	1.441	0.00337476	0.0375238	0.561668	0.0660404	-0.495628	0.17892	0.356019												SMYD2,SMYD3	Methyltransferase involved in methylation of histone H4 Lys5, -8, -12; S-adenosylmethionine-dependent; zinc-finger protein, contains one canonical and two unusual fingers in unusual arrangements; deletion enhances replication of positive-strand RNA virus		MAGT1,TUSC3	Gamma subunit of the oligosaccharyltransferase complex of the ER lumen; complex catalyzes asparagine-linked glycosylation of newly synthesized proteins; Ost3p is important for N-glycosylation of a subset of proteins
YDR432W	NPL3	-7.56366	3.87606	11.4397	0.0015727	0.0253771	-13.3701	-15.2258	-1.85573	0.143021	0.32077					X	X						SRSF1,SRSF4,SRSF5,SRSF6,SRSF7,SRSF9	RNA-binding protein; promotes elongation, regulates termination, and carries poly(A) mRNA from nucleus to cytoplasm; represses translation initiation by binding eIF4G; required for pre-mRNA splicing; interacts with E3 ubiquitin ligase Bre1p, linking histone ubiquitination to mRNA processing; may have role in telomere maintenance; dissociation from mRNAs promoted by Mtr10p; phosphorylated by Sky1p…	EIF3J	EIF3J	eIF3j component of translation initiation factor 3 (eIF3); dual function protein involved in translation initiation as a substoichiometric component (eIF3j) of eIF3; required for 20S pre-rRNA processing; required at post-transcriptional step for efficient retrotransposition; absence decreases Ty1 Gag:GFP protein levels; binds eIF3 subunits Rpg1p, Prt1p and 18S rRNA; eIF3 also involved in programm…
YCR028C-A	RIM1	15.427	9.92219	-5.50483	0.000644235	0.0148506	-7.1576	-4.9899	2.16769	0.0102865	0.0818238										X		SSBP1	ssDNA-binding protein essential for mitochondrial genome maintenance; involved in mitochondrial DNA replication; stimulates utilization by Mip1p DNA polymerase of RNA primers synthesized by Rpo41p			Part of evolutionarily-conserved CCR4-NOT regulatory complex; contains single ABC-type ATPase domain but no transmembrane domain; interacts with several subunits of Mediator
YGR112W	SHY1	16.3563	12.1066	-4.24974	0.000167922	0.00751891	-6.4123	-2.99549	3.4168	0.401967	0.511727										X		SURF1	Mitochondrial inner membrane protein required for complex IV assembly; associates with complex IV assembly intermediates and complex III/complex IV supercomplexes; similar to human SURF1 involved in Leigh Syndrome; complex IV is also known as cytochrome c oxidase		MRPL17	Mitochondrial ribosomal protein of the large subunit
YDR448W	ADA2	1.47384	0.650684	-0.823159	0.00990001	0.0691214	-0.244275	1.2612	1.50548	7.73691e-05	0.00355002	X	X				X						TADA2A,TADA2B	Transcription coactivator; component of the ADA and SAGA transcriptional adaptor/HAT (histone acetyltransferase) complexes	RPP14		Mitochondrial 3-hydroxyacyl-thioester dehydratase; involved in fatty acid biosynthesis, required for respiratory growth and for normal mitochondrial morphology
YGL043W	DST1	-1.74584	-0.530373	1.21546	0.029764	0.131165	0.716081	-0.739744	-1.45582	0.000441712	0.012733												TCEA1,TCEA2,TCEA3,TCEANC,TCEANC2	General transcription elongation factor TFIIS; enables RNA polymerase II to read through blocks to elongation by stimulating cleavage of nascent transcripts stalled at transcription arrest sites; maintains RNAPII elongation activity on ribosomal protein genes during conditions of transcriptional stress			Alpha-1,3-mannosyltransferase; integral membrane glycoprotein of the Golgi complex, required for addition of alpha1,3-mannose linkages to N-linked and O-linked oligosaccharides, one of five S. cerevisiae proteins of the MNN1 family
YBR223C	TDP1	0.711506	-1.1862	-1.89771	6.68893e-06	0.000719554	1.45678	2.44117	0.98439	0.0031666	0.0419168	X									X		TDP1	Tyrosyl-DNA phosphodiesterase I; hydrolyzes 3' and 5'-phosphotyrosyl bonds; involved in the repair of DNA lesions created by topo I and topo II; mutations in the human homolog, TDP1, result in the a neurodegenerative disease, spinocerebellar ataxia with axonal neuropathy (SCAN1); yeast cells and human rhabdomyosarcoma lines that overexpress TDP1 both exhibit elevated dosage chromosomal instabilit…		MAP3K1,MAP3K19,MAP3K2,MAP3K3,NRBP1,NRBP2,WNK1,WNK2,WNK3,WNK4	MAPKKK acting in the protein kinase C signaling pathway; the kinase C signaling pathway controls cell integrity; upon activation by Pkc1p phosphorylates downstream kinases Mkk1p and Mkk2p; MAPKKK is an acronym for mitogen-activated protein (MAP) kinase kinase kinase
YOR283W	YOR283W	-3.03184	-3.14781	-0.115969	0.885734	0.654029	-1.28346	-3.49568	-2.21222	6.10492e-06	0.000450924						X						TIGAR	Phosphatase with a broad substrate specificity; has some similarity to GPM1/YKL152C, a phosphoglycerate mutase; YOR283W is not an essential gene
YNL273W	TOF1	-2.13484	-2.08358	0.0512656	0.493074	0.522294	4.62498	3.56211	-1.06287	0.000680304	0.0163765	X				X	X						TIMELESS	Subunit of a replication-pausing checkpoint complex; Tof1p-Mrc1p-Csm3p acts at the stalled replication fork to promote sister chromatid cohesion after DNA damage, facilitating gap repair of damaged DNA; interacts with the MCM helicase; relocalizes to the cytosol in response to hypoxia			Deubiquitinating enzyme anchored to the outer mitochondrial membrane; probably not important for general mitochondrial functioning, but may perform a more specialized function at mitochondria
YKR051W	HFL1	1.10177	0.071279	-1.03049	0.000193196	0.00813239	-0.06426	-0.0353723	0.0288877	0.614016	0.595937								X				TMEM184A,TMEM184B,TMEM184C	Protein of unknown function that interacts with Atg8p; null mutant is defective in stationary phase-induced vacuolar microdomain formation; homolog of S. pombe hfl1			Subunit of the RecQ (Sgs1p) - Topo III (Top3p) complex; stimulates superhelical relaxing, DNA catenation/decatenation and ssDNA binding activities of Top3p; involved in response to DNA damage; functions in S phase-mediated cohesion establishment via a pathway involving the Ctf18-RFC complex and Mrc1p; stimulates Top3p DNA catenation/decatenation activity; null mutants display increased rates of r…
YLR065C	SND2	-7.22751	-2.38519	4.84232	0.00423624	0.0418364	-6.00719	-3.97947	2.02772	0.127799	0.30207							X	X				TMEM208	Protein involved in SRP-independent targeting of substrates to the ER; component of an alternative ER targeting pathway that has partial functional redundancy with the GET pathway; preference for substrates with downstream transmembrane domains; interacts with Snd1p, Pho88p/Snd3p, and Sec61p-translocon subunits; can compensate for loss of SRP; role in the late endosome-vacuole interface; putative…		NEMF	Component of RQC, which mediates nascent chain degradation; RQC (ribosome quality control complex) is a ribosome-bound complex required for degradation of polypeptides arising from stalled translation; recruits alanine- and threonine-charged tRNA to the A site and directs the elongation of nascent chains independently of mRNA or 40S subunits; monitors translation stress and signals this to Hsf1p
YKR088C	TVP38	-1.2364	-1.60443	-0.368029	0.99274	0.674797	2.19129	1.47022	-0.721069	0.000193823	0.00690548												TMEM64	Integral membrane protein; localized to late Golgi vesicles along with the v-SNARE Tlg2p; required for asymmetric localization of Kar9p during mitosis; GFP-fusion protein localizes to the cytoplasm in a punctate pattern			RNA polymerase I subunit A14
YGL016W	KAP122	-0.652693	-0.277374	0.375319	0.338611	0.445827	0.904595	-0.766271	-1.67087	0.00107126	0.0205326												TNPO3	Karyopherin beta; responsible for import of the Toa1p-Toa2p complex into the nucleus; binds to nucleoporins Nup1p and Nup2p; may play a role in regulation of pleiotropic drug resistance			Putative RNA-binding protein; interacts with Mex67p, which is a component of the nuclear pore involved in nuclear mRNA export; MIP6 has a paralog, PES4, that arose from the whole genome duplication
YNL070W	TOM7	0.806551	-1.54667	-2.35322	0.00103804	0.0198354	-1.80186	-0.627805	1.17405	0.00311831	0.0419168										X		TOMM7	Component of the TOM (translocase of outer membrane) complex; responsible for recognition and initial import steps for all mitochondrially directed proteins; promotes assembly and stability of the TOM complex		COQ3,WBSCR27	Trans-aconitate methyltransferase; cytosolic enzyme that catalyzes the methyl esterification of 3-isopropylmalate, an intermediate of the leucine biosynthetic pathway, and trans-aconitate, which inhibits the citric acid cycle
YDR217C	RAD9	0.499586	5.76323	5.26365	6.27842e-10	4.5589e-07	-1.03243	-3.81231	-2.77988	6.31536e-11	3.82503e-08	X	X	X		X							TP53BP1	DNA damage-dependent checkpoint protein; required for cell-cycle arrest in G1/S, intra-S, and G2/M, plays a role in postreplication repair (PRR) pathway; transmits checkpoint signal by activating Rad53p and Chk1p; hyperphosphorylated by Mec1p and Tel1p; multiple cyclin dependent kinase consensus sites and the C-terminal BRCT domain contribute to DNA damage checkpoint activation; Rad9p Chk1 Activa…		SLC5A12,SLC5A5,SLC5A6,SLC5A8	Plasma membrane transporter for both urea and polyamines; expression is highly sensitive to nitrogen catabolite repression and induced by allophanate, the last intermediate of the allantoin degradative pathway
YKL198C	PTK1	0.871004	0.572593	-0.298411	0.380275	0.466926	-0.740392	-0.202358	0.538034	0.00348787	0.0442508												TSSK1B,TSSK2,TSSK3,TSSK4,TSSK6	Putative serine/threonine protein kinase; regulates spermine uptake; involved in polyamine transport; possible mitochondrial protein; PTK1 has a paralog, PTK2, that arose from the whole genome duplication		TSTD1	Protein with rhodanese activity; contains a rhodanese-like domain similar to Rdl1p, Uba4p, Tum1p, and Ych1p; overexpression causes a cell cycle delay; null mutant displays elevated frequency of mitochondrial genome loss
YOR286W	RDL2	-0.149596	-0.630209	-0.480613	0.231468	0.372464	0.4374	-0.31037	-0.74777	0.000125836	0.00501415										X		TSTD1	Protein with rhodanese activity; contains a rhodanese-like domain similar to Rdl1p, Uba4p, Tum1p, and Ych1p; overexpression causes a cell cycle delay; null mutant displays elevated frequency of mitochondrial genome loss
YPR189W	SKI3	14.2235	7.96364	-6.25981	0.000359972	0.0112163	-4.45334	-0.515995	3.93735	0.0195993	0.115699												TTC32,TTC37	Ski complex component and TPR protein; mediates 3'-5' RNA degradation by the cytoplasmic exosome; null mutants have superkiller phenotype of increased viral dsRNAs and are synthetic lethal with mutations in 5'-3' mRNA decay; mutations in the human ortholog, TTC37, causes Syndromic diarrhea/Trichohepatoenteric (SD/THE) syndrome		LDAH	Bifunctional triacylglycerol lipase and short chain ester hydrolase; null mutant results in the accumulation of both triacylglycerol and fatty acids derived from neutral lipids and phospholipids as well as an increase in the quantity of lipid droplets; contains an alpha/beta hydrolase domain with a conserved GXSXG lipase motif; localizes to lipid droplets; GFP-fusion protein localizes to the cyto…
YHL012W	YHL012W	-2.24094	-3.48904	-1.2481	0.000256482	0.00931187	1.67778	0.995443	-0.682332	0.0515695	0.193234												UAP1,UAP1L1,UGP2			MTG2	Putative GTPase; member of the Obg family; peripheral protein of the mitochondrial inner membrane that associates with the large ribosomal subunit; required for mitochondrial translation, possibly via a role in ribosome assembly
YDR092W	UBC13	1.23238	0.540109	-0.692275	0.465233	0.512033	1.40221	-1.23691	-2.63912	6.38437e-07	6.66694e-05	X			X	X							UBE2N,UBE2NL,UBE2T	E2 ubiquitin-conjugating enzyme; involved in the error-free DNA postreplication repair pathway; interacts with Mms2p to assemble ubiquitin chains at the Ub Lys-63 residue; DNA damage triggers redistribution from the cytoplasm to the nucleus		DCPS	m(7)GpppX pyrophosphatase regulator; non-essential, stress induced regulatory protein; modulates m7G-oligoribonucleotide metabolism; inhibits Dcs1p; regulated by Msn2p, Msn4p, and the Ras-cAMP-cAPK signaling pathway; mutant has increased aneuploidy tolerance; DCS2 has a paralog, DCS1, that arose from the whole genome duplication
YPR191W	QCR2	-1.57664	-2.96321	-1.38657	0.00166188	0.0256772	3.73547	4.80066	1.06519	0.00653767	0.0630358										X		UQCRC2	Subunit 2 of ubiquinol cytochrome-c reductase (Complex III); Complex III is a component of the mitochondrial inner membrane electron transport chain; phosphorylated; transcription is regulated by Hap1p, Hap2p/Hap3p, and heme		BACE1,BACE2,CTSE,PGA3,PGA4,PGA5,PGC	Putative GPI-anchored aspartic protease; member of the yapsin family of proteases involved in cell wall growth and maintenance
YLL040C	VPS13	1.2313	-0.0703776	-1.30168	0.00407406	0.0412694	1.58226	1.28203	-0.300228	0.329392	0.467117										X		VPS13A,VPS13B,VPS13C,VPS13D	Protein involved in prospore membrane morphogenesis; peripheral membrane protein that localizes to the prospore membrane and at numerous membrane contact sites; involved in sporulation, vacuolar protein sorting, prospore membrane formation during sporulation, and protein-Golgi retention; required for mitochondrial integrity; contains a PH-like domain; homologous to human CHAC and COH1 which are i…		RPL37A	Ribosomal 60S subunit protein L43B; homologous to mammalian ribosomal protein L37A, no bacterial homolog; RPL43B has a paralog, RPL43A, that arose from the whole genome duplication; protein abundance increases in response to DNA replication stress
YJR102C	VPS25	3.43043	3.45138	0.0209418	0.359306	0.457159	-1.30152	-2.87112	-1.5696	0.00186914	0.0309312												VPS25	Component of the ESCRT-II complex; ESCRT-II is involved in ubiquitin-dependent sorting of proteins into the endosome		RAD17	Checkpoint protein; involved in the activation of the DNA damage and meiotic pachytene checkpoints; subunit of a clamp loader that loads Rad17p-Mec3p-Ddc1p onto DNA; homolog of human and S. pombe Rad17 protein
YAL002W	VPS8	-0.295368	1.23382	1.52918	0.00535388	0.0483743	-0.70335	-0.194331	0.509019	0.559589	0.576015					X							VPS41,VPS8	Membrane-binding component of the CORVET complex; involved in endosomal vesicle tethering and fusion in the endosome to vacuole protein targeting pathway; interacts with Vps21p; contains RING finger motif			Specific assembly chaperone for ribosomal protein Rpl4p; binds to an evolutionarily conserved surface extension of nascent Rpl4p and chaperones Rpl4p until its assembly into the pre-ribosome; transcriptionally co-regulated with rRNA and ribosome biosynthesis genes
YDR268W	MSW1	-0.0399834	1.19632	1.2363	0.00112154	0.0207169	1.32465	1.11149	-0.21316	0.575328	0.582789					X					X		WARS2	Mitochondrial tryptophanyl-tRNA synthetase			Component of the telomerase holoenzyme; involved in telomere replication; synthesis of the full-length protein results from a programmed +1 ribosomal frameshift
YMR201C	RAD14	26.1401	13.1776	-12.9625	5.32312e-05	0.00359557	-19.2407	-9.71854	9.52213	0.000416098	0.0121163	X		X		X							XPA	Protein that recognizes and binds damaged DNA during NER; subunit of Nucleotide Excision Repair Factor 1 (NEF1); contains zinc finger motif; homolog of human XPA protein; NER stands for nucleotide excision repair			Mannosylinositol phosphorylceramide (MIPC) synthase catalytic subunit; forms a complex with regulatory subunit Csg2p; function in sphingolipid biosynthesis is overlapping with that of Csh1p; SUR1 has a paralog, CSH1, that arose from the whole genome duplication
YER162C	RAD4	-0.110996	-2.53179	-2.42079	0.000468702	0.0121933	-0.319322	-4.53269	-4.21336	2.68786e-10	1.01747e-07	X		X		X							XPC	Protein that recognizes and binds damaged DNA (with Rad23p) during NER; subunit of Nuclear Excision Repair Factor 2 (NEF2); also involved, with Rad23p, in turnover of ubiquitylated proteins; Rad4p-Rad23p heterodimer binds to promoters of DNA damage response genes to repress their transcription in the absence of DNA damage; NER stands for nucleotide excision repair			F-box component of an SCF ubiquitin protein ligase complex; associates with and is required for Fzo1p ubiquitination and for mitochondria fusion; stimulates nuclear export of specific mRNAs; promotes ubiquitin-mediated degradation of Gal4p in some strains
YLR376C	PSY3	-0.419944	-2.22625	-1.8063	9.88807e-05	0.00531848	-0.289242	-0.98076	-0.691519	0.00341871	0.0442439	X	X		X		X						XRCC3	Component of Shu complex (aka PCSS complex); Shu complex also includes Shu1, Csm2, Shu2, and promotes error-free DNA repair; promotes Rad51p filament assembly; Shu complex mediates inhibition of Srs2p function; Psy3p and Csm2p contain similar DNA-binding regions which work together to form a single DNA binding site; deletion of PSY3 results in a mutator phenotype; deletion increases sensitivity t…		DNAJA1,DNAJA4,DNAJC11	One of several homologs of bacterial chaperone DnaJ; located in the ER lumen where it cooperates with Kar2p to mediate maturation of proteins
YDR043C	NRG1	-3.32714	-1.46445	1.86269	0.00525303	0.0479792	0.763882	0.378356	-0.385525	0.459745	0.537556												YY1,YY2,ZFP42	Transcriptional repressor; recruits the Cyc8p-Tup1p complex to promoters; mediates glucose repression and negatively regulates a variety of processes including filamentous growth and alkaline pH response; activated in stochastic pulses of nuclear localization in response to low glucose	HCCS	HCCS	Cytochrome c heme lyase (holocytochrome c synthase); attaches heme to apo-cytochrome c (Cyc1p or Cyc7p) in mitochondrial intermembrane space; human homolog HCCS implicated in microphthalmia with linear skin defects (MLS), and can complement yeast null mutant
YML041C	VPS71	1.59378	1.13392	-0.459858	0.288015	0.415082	-2.17916	-3.2022	-1.02303	0.00344534	0.0442508												ZNHIT1	Nucleosome-binding component of the SWR1 complex; SWR1 exchanges histone variant H2AZ (Htz1p) for chromatin-bound histone H2A; required for vacuolar protein sorting		SURF1	Mitochondrial inner membrane protein required for complex IV assembly; associates with complex IV assembly intermediates and complex III/complex IV supercomplexes; similar to human SURF1 involved in Leigh Syndrome; complex IV is also known as cytochrome c oxidase
YAL055W	PEX22	-0.499286	0.128685	0.62797	0.0149221	0.0888137	0.609923	-0.320185	-0.930108	0.00275106	0.0389308													Putative peroxisomal membrane protein; required for import of peroxisomal proteins; functionally complements a Pichia pastoris pex22 mutation		PRDX5	Thiol-specific peroxiredoxin; reduces hydroperoxides to protect against oxidative damage; function in vivo requires covalent conjugation to Urm1p
YBL059W	IAI11	5.01146	2.73706	-2.2744	3.66811e-05	0.00280369	-1.30457	-0.263914	1.04065	0.00755992	0.0673356										X					GSG2,IRAK1,IRAK2,IRAK3,IRAK4	Protein kinase; along with its paralog, ALK2, required for proper spindle positioning and nuclear segregation following mitotic arrest, proper organization of cell polarity factors in mitosis, proper localization of formins and polarity factors, and survival in cells that activate spindle assembly checkpoint; phosphorylated in response to DNA damage; ALK1 has a paralog, ALK2, that arose from the …
YBL062W	YBL062W	-0.303053	-0.104293	0.19876	0.908147	0.657857	2.77156	1.7651	-1.00647	0.00106798	0.0205326															APEX1,APEX2	Class II abasic (AP) endonuclease involved in repair of DNA damage; homolog of human HAP1 and E. coli exoIII
YBR043C	QDR3	0.870443	0.209469	-0.660974	0.404781	0.480667	-0.000256341	1.16673	1.16698	0.000495208	0.0137584													Multidrug transporter of the major facilitator superfamily; member of the 12-spanner drug:H(+) antiporter DHA1 family; has a role in polyamine homeostasis; involved in spore wall asembly; sequence similarity to DTR1 and QDR1, and the triple mutant dtr1 qdr1 qdr3 exhibits reduced dityrosine fluorescence relative to the single mutants; expression is upregulated under polyamine stress; required for …			Plasma membrane metalloid/H+ antiporter; member of bile/arsenite/riboflavin transporter (BART) superfamily; transports arsenite and antimonite; required for resistance to arsenic compounds; transcription is activated by Arr1p in the presence of arsenite
YBR078W	ECM33	-0.205424	3.03494	3.24036	0.000765265	0.0158845	-0.408091	-2.50032	-2.09223	9.54566e-05	0.00402538									X	X			GPI-anchored protein of unknown function; possible role in apical bud growth; GPI-anchoring on the plasma membrane crucial to function; phosphorylated in mitochondria; similar to Sps2p; ECM33 has a paralog, PST1, that arose from the whole genome duplication		RB1CC1	Adapter protein for pexophagy and the Cvt targeting pathway; directs receptor-bound cargo to the phagophore assembly site (PAS) for packaging into vesicles; required for recruiting other proteins to the PAS; recruits Dnm1p to facilitate fission of mitochondria that are destined for removal by mitophagy
YBR099C	YBR099C	-0.150666	4.19465	4.34531	3.83089e-09	1.58954e-06	0.109724	-4.31525	-4.42497	2.08976e-10	9.04075e-08					X											Autophagy-specific protein; required for recruiting other ATG proteins to the pre-autophagosomal structure (PAS); interacts with Atg17p and localizas to the PAS in a manner interdependent with Atg17p and Cis1p; not conserved; relocalizes from nucleus to cytoplasmic foci upon DNA replication stress
YBR100W	YBR100W	-0.605407	0.704518	1.30992	0.00142866	0.0241814	0.535081	-1.00528	-1.54037	0.00308371	0.0419168															ATG7	Autophagy-related protein and dual specificity member of the E1 family; mediates the attachment of Atg12p to Atg5p and Atg8p to phosphatidylethanolamine which are required steps in autophagosome formation; E1 enzymes are also known as ubiquitin-activating enzymes; involved in methionine restriction extension of chronological lifespan in an autophagy-dependent manner
YBR106W	SND3	-10.0708	-2.00139	8.06941	2.88233e-05	0.00228179	-9.0043	-7.29974	1.70456	0.223669	0.390853							X			X			Protein involved in SRP-independent targeting of substrates to the ER; component of an alternative ER targeting pathway that has partial functional redundancy with the GET pathway; preference for substrates with downstream transmembrane domains; interacts with Snd1p, Env10p/Snd2p, and Sec61p-translocon subunits; can compensate for loss of SRP; role in phosphate transport, interacting with pho88, …		ATPAF1	Molecular chaperone; required for the assembly of alpha and beta subunits into the F1 sector of mitochondrial F1F0 ATP synthase; N-terminally propionylated in vivo
YBR128C	ATG14	-0.570973	-1.95525	-1.38427	0.000663837	0.0150634	2.53391	2.26768	-0.266225	0.472559	0.544151													Autophagy-specific subunit of phosphatidylinositol 3-kinase complex I; Atg14p targets complex I to the phagophore assembly site (PAS); required for localizing additional ATG proteins to the PAS; required for overflow degradation of misfolded proteins when ERAD is saturated; homolog of human Barkor; other members are Vps34, Vps15, and Vps30p			Subunit of the mitochondrial F1F0 ATP synthase; F1F0 ATP synthase is a large, evolutionarily conserved enzyme complex required for ATP synthesis; termed subunit I or subunit j; does not correspond to known ATP synthase subunits in other organisms
YBR134W	YBR134W	-3.74882	-5.09603	-1.34721	0.0330266	0.136158	6.04312	3.48152	-2.5616	0.00026828	0.00873601															ATP5O	Subunit 5 of the stator stalk of mitochondrial F1F0 ATP synthase; F1F0 ATP synthase is a large, evolutionarily conserved enzyme complex required for ATP synthesis; homologous to bovine subunit OSCP (oligomycin sensitivity-conferring protein); phosphorylated
YCL030C	HIS4	-0.0173758	0.704153	0.721528	0.00046698	0.0121933	-0.0921462	-0.0109861	0.0811601	0.824623	0.664516													Multifunctional enzyme containing phosphoribosyl-ATP pyrophosphatase; phosphoribosyl-AMP cyclohydrolase, and histidinol dehydrogenase activities; catalyzes the second, third, ninth and tenth steps in histidine biosynthesis		SFN,YWHAB,YWHAE,YWHAG,YWHAH,YWHAQ,YWHAZ	14-3-3 protein, major isoform; controls proteome at post-transcriptional level, binds proteins and DNA, involved in regulation of exocytosis, vesicle transport, Ras/MAPK and rapamycin-sensitive signaling, aggresome formation, spindle position checkpoint; protein increases in abundance and relative distribution to the nucleus increases upon DNA replication stress; antiapoptotic gene similar to hum…
YCL062W	YCL062W	-5.23099	-3.14423	2.08676	0.00219008	0.0300244	-0.387777	-0.500101	-0.112324	0.228594	0.394228						X									BUB3	Kinetochore checkpoint WD40 repeat protein; localizes to kinetochores during prophase and metaphase, delays anaphase in the presence of unattached kinetochores; forms complexes with Mad1p-Bub1p and with Cdc20p, binds Mad2p and Mad3p; functions at kinetochore to activate APC/C-Cdc20p for normal mitotic progression
YCR049C	YCR049C	-0.459947	-0.0179715	0.441975	0.135352	0.291044	-0.0285382	1.16826	1.1968	5.56197e-05	0.00276125																Mitochondrial translational activator of the COB mRNA; membrane protein that interacts with translating ribosomes, acts on the COB mRNA 5'-untranslated leader
YDL032W	YDL032W	16.8517	11.27	-5.58171	0.000291438	0.00984786	-5.05913	-2.79945	2.25967	0.00747845	0.0670042																Subunit of the Anaphase-Promoting Complex/Cyclosome (APC/C); which is a ubiquitin-protein ligase required for degradation of anaphase inhibitors, including mitotic cyclins, during the metaphase/anaphase transition; relocalizes to the cytosol in response to hypoxia
YDL035C	GPR1	-5.30928	-4.8841	0.425187	0.739005	0.608399	0.305734	-2.35549	-2.66122	0.000546823	0.0146546													Plasma membrane G protein coupled receptor (GPCR); interacts with the heterotrimeric G protein alpha subunit, Gpa2p, and with Plc1p; sensor that integrates nutritional signals with the modulation of cell fate via PKA and cAMP synthesis	OXSM	FASN,OXSM	Mitochondrial beta-keto-acyl synthase; possible role in fatty acid synthesis; required for mitochondrial respiration; human homolog OXSM can complement yeast cem1 null mutant
YDL041W	YDL041W	-3.5265	1.39286	4.91936	0.000406953	0.0117029	-11.7422	-13.3602	-1.61793	0.00639897	0.0627131					X										CENPN,RUNX1-IT1	Outer kinetochore protein required for chromosome stability; involved in new kinetochore assembly and sister chromatid cohesion; forms a stable complex with Iml3p; peripheral component of the Ctf19 kinetochore complex that interacts with Ctf19p, Ctf3p, and Mif2p; required for the spindle assembly checkpoint; orthologous to human centromere constitutive-associated network (CCAN) subunit CENP-N and…
YDL045W-A	MRP10	10.5117	5.65471	-4.85694	0.000342637	0.0110576	-0.919595	1.03735	1.95694	0.000693886	0.0163765										X			Mitochondrial ribosomal protein of the small subunit; contains twin cysteine-x9-cysteine motifs; oxidized by Mia40p during import into mitochondria	RP2	TBCC	GTPase-activating protein (GAP) for Cin4p; tubulin folding factor C involved in beta-tubulin (Tub2p) folding; mutants display increased chromosome loss and benomyl sensitivity; human homolog RP2 complements yeast null mutant
YDL069C	CBS1	15.0005	10.1504	-4.85008	0.00402916	0.0412065	-6.3342	-3.16737	3.16683	0.0213645	0.120259										X			Mitochondrial translational activator of the COB mRNA; membrane protein that interacts with translating ribosomes, acts on the COB mRNA 5'-untranslated leader			Putative oxidoreductase, subunit of Coenzyme Q biosynthetic complexes; required for synthesis of wild-type levels of Coenzyme Q (ubiquinone); member of the short-chain dehydrogenase/reductase (SDR) superfamily; orthologous gene in some other fungi is fused to the COQ10 ortholog
YDL162C	YDL162C	-1.11556	-0.887506	0.228057	0.0457351	0.163593	-0.464105	-1.36797	-0.903861	0.00111263	0.021059															COX5A	Subunit VI of cytochrome c oxidase (Complex IV); Complex IV is the terminal member of the mitochondrial inner membrane electron transport chain; expression is regulated by oxygen levels
YDL169C	UGX2	0.586257	-0.497719	-1.08398	0.00145937	0.0243604	0.655105	0.407482	-0.247623	0.73141	0.637147						X							Protein of unknown function; transcript accumulates in response to any combination of stress conditions		CRLS1	Cardiolipin synthase; produces cardiolipin, which is a phospholipid of the mitochondrial inner membrane that is required for normal mitochondrial membrane potential and function and for correct integration of membrane-multispanning proteins into the mitochondrial outer membrane; required to maintain tubular mitochondrial morphology and functions in mitochondrial fusion; also required for normal v…
YDL173W	PAR32	2.08149	0.969001	-1.11249	0.00532456	0.0483743	1.6367	1.53947	-0.0972236	0.166523	0.345051													Low complexity protein; mediates inhibition of Mep1p and Mep3p activity; hyperphosphorylated upon rapamycin treatment in a Tap42p-dependent manner; green fluorescent protein (GFP)-fusion protein localizes to the cytoplasm; phosphorylation and localization regulated by TORC1-effector kinase, Npr1p			Protein of unknown function; green fluorescent protein (GFP)- fusion protein localizes to the mother side of the bud neck and the vacuole; YOL007C is not an essential gene
YDR003W	RCR2	-0.917654	-0.936755	-0.0191013	0.719603	0.600765	1.82171	1.06843	-0.753279	0.00310969	0.0419168							X						Vacuolar protein; presumably functions within the endosomal-vacuolar trafficking pathway, affecting events that determine whether plasma membrane proteins are degraded or routed to the plasma membrane; RCR2 has a paralog, RCR1, that arose from the whole genome duplication		ATF2,ATF7,CREB5,JUN,JUNB,JUND	Basic leucine zipper (bZIP) transcription factor from ATF/CREB family involved in stress-responsive regulatory network; mediates transcriptional activation of NCE103 in response to low CO2 levels; proposed to be a regulator of oleate responsive genes; involved in utilization of non-optimal carbon sources and chromosome stability; relocalizes to the cytosol in response to hypoxia; CST6 has a paral…
YDR007W	TRP1	-0.694085	0.239655	0.93374	0.0225802	0.112526	-0.533957	0.312745	0.846703	0.00078058	0.0173814													Phosphoribosylanthranilate isomerase; catalyzes the third step in tryptophan biosynthesis; in 2004, the sequence of TRP1 from strain S228C was updated by changing the previously annotated internal STOP (TAA) to serine (TCA); enhances vegetative growth at low and high temperatures when used as an auxotrophic marker in strains such as W303		CAT	Catalase A; breaks down hydrogen peroxide in the peroxisomal matrix formed by acyl-CoA oxidase (Pox1p) during fatty acid beta-oxidation
YDR026C	NSI1	1.04433	0.00925574	-1.03508	0.00374568	0.0395034	0.788552	1.2602	0.471646	0.10074	0.269979													RNA polymerase I termination factor; binds to rDNA terminator element, required for efficient Pol I termination; required for rDNA silencing at NTS1; facilities association of Sir2p with NTS1, contributes to rDNA stability and cell longevity; interacts physically with Fob1p and RENT subunits, Sir2p and Net1p; may interact with ribosomes, based on co-purification experiments; Myb-like DNA-binding …		MEIS1,MEIS2,MEIS3,MEIS3P1,MEIS3P2,PBX1,PBX2,PBX3,PBX4,PKNOX1,PKNOX2,TGIF1,TGIF2,TGIF2LX,TGIF2LY	Homeodomain-containing transcriptional repressor; regulates expression of PTR2, which encodes a major peptide transporter; imported peptides activate ubiquitin-dependent proteolysis, resulting in degradation of Cup9p and de-repression of PTR2 transcription; CUP9 has a paralog, TOS8, that arose from the whole genome duplication; protein abundance increases in response to DNA replication stress
YDR028C	REG1	-3.96571	-2.92875	1.03696	0.0215778	0.110676	-1.33734	-2.204	-0.866668	0.000829571	0.0177087													Regulatory subunit of type 1 protein phosphatase Glc7p; involved in negative regulation of glucose-repressible genes; involved in regulation of the nucleocytoplasmic shuttling of Hxk2p; REG1 has a paralog, REG2, that arose from the whole genome duplication		CYB5R1,CYB5R2,CYB5R3,CYB5R4,CYB5RL	Mitochondrial peripheral inner membrane protein; contains a FAD cofactor in a domain exposed in the intermembrane space; exhibits redox activity in vitro; likely participates in ligation of heme to acytochromes c and c1 (Cyc1p and Cyt1p)
YDR065W	RRG1	20.9541	10.08	-10.8741	5.70375e-05	0.00368144	-12.9374	-8.57067	4.36678	0.00797119	0.0695664					X					X			Protein of unknown function; required for efficient 5' processing of mitochondrial tRNAs, for respiratory growth and mitochondrial genome maintenance; required for vacuolar acidification; localizes to the matrix side of the inner mitochondrial membrane		PITRM1	Lysine-specific metalloprotease of the pitrilysin family; metalloprotease of the intermembrane space; degrades proteins and presequence peptides cleaved from imported proteins; required for normal mitochondrial morphology
YDR114C	YDR114C	14.766	8.0465	-6.71949	0.00204464	0.0286891	-12.8722	-6.88419	5.98797	0.0104785	0.0826372															RAD9A,RAD9B	DNA damage checkpoint protein; part of a PCNA-like complex required for DNA damage response, required for pachytene checkpoint to inhibit cell cycle in response to unrepaired recombination intermediates; potential Cdc28p substrate; forms nuclear foci upon DNA replication stress
YDR116C	MRPL1	10.1538	6.86613	-3.28769	0.00342319	0.037741	-6.31604	-2.73867	3.57738	0.042874	0.177617								X		X			Mitochondrial ribosomal protein of the large subunit		NUDT10,NUDT11,NUDT3,NUDT4	Polyphosphate phosphatase; hydrolyzes diphosphorylated inositol polyphosphates and diadenosine polyphosphates; high specificity for diadenosine hexa- and pentaphosphates; contains endopolyphosphatase activity with a high affinity for polyphosphates, an activity also observed for its human DIPP homologs; possesses mRNA decapping activity; nudix hydrolase family member; protein abundance increases …
YDR154C	YDR154C	0.249869	-0.458947	-0.708815	0.00286855	0.0344985	-0.923095	-0.862067	0.0610279	0.595357	0.590629															DDX20,DDX46,DDX6	Cytoplasmic DEAD-box helicase, stimulates mRNA decapping; coordinates distinct steps in mRNA function and decay, interacting with both decapping and deadenylase complexes; role in translational repression, mRNA decay, and possibly mRNA export; interacts and cooperates with Ngr1p to promote specific mRNA decay; ATP- and RNA-bound form promotes processing body (PB) assembly, while ATPase stimulatio…
YDR156W	RPA14	-1.4311	-1.41851	0.0125866	0.644735	0.57815	-0.275246	-1.32394	-1.04869	0.0025448	0.0365948													RNA polymerase I subunit A14			Origin-binding F-box protein; forms SCF ubiquitin ligase complex with Skp1p and Cdc53p; functions in ubiquitination of silent chromatin structural protein Sir4p; required to target Cdc6p for destruction during G1 phase; required for deactivation of Rad53 checkpoint kinase, completion of DNA replication during recovery from DNA damage, assembly of RSC complex, RSC-mediated transcription regulation…
YDR161W	ACL4	-8.07095	-2.03435	6.03661	0.000277608	0.00983303	-7.57657	-8.48977	-0.913204	0.889081	0.684063							X						Specific assembly chaperone for ribosomal protein Rpl4p; binds to an evolutionarily conserved surface extension of nascent Rpl4p and chaperones Rpl4p until its assembly into the pre-ribosome; transcriptionally co-regulated with rRNA and ribosome biosynthesis genes			2-deoxyglucose-6-phosphate phosphatase; member of a family of low molecular weight phosphatases, induced by oxidative and osmotic stress, confers 2-deoxyglucose resistance when overexpressed; DOG2 has a paralog, DOG1, that arose from a single-locus duplication; the last half of DOG1 and DOG2 are subject to gene conversions among S. cerevisiae, S. paradoxus, and S. mikatae
YDR162C	NBP2	2.77604	5.34498	2.56894	5.08859e-05	0.00357979	-1.91348	-3.72182	-1.80834	0.0216355	0.120454													Protein involved in the HOG (high osmolarity glycerol) pathway; negatively regulates Hog1p by recruitment of phosphatase Ptc1p to the Pbs2p-Hog1p complex; interacts with Bck1p and down regulates the cell wall integrity pathway; found in the nucleus and cytoplasm; contains an SH3 domain and a Ptc1p binding domain (PBM)		DR1,FAM47DP,FAM47E,NFYB,POLE3	Subunit of DNA pol epsilon and of ISW2 chromatin accessibility complex; involved in both chromosomal DNA replication and inheritance of telomeric silencing; stabilizes the interaction of Pol epsilon with primer-template DNA, positively affecting the processivity of the polymerase and exonuclease activities of Pol epsilon; interacts with extranucleosomal DNA and acts as anchor point for ISW2 compl…
YDR195W	REF2	3.26298	5.14207	1.87909	0.104431	0.255129	-4.44844	-2.81107	1.63737	0.00035394	0.0109373					X								RNA-binding protein; involved in the cleavage step of mRNA 3'-end formation prior to polyadenylation, and in snoRNA maturation; part of holo-CPF subcomplex APT, which associates with 3'-ends of snoRNA- and mRNA-encoding genes; putative regulatory subunit of type 1 protein phosphatase Glc7p, required for actomyosin ring formation, and for timely dephosphorylation and release of Bnr1p from the divi…		DTD1	D-Tyr-tRNA(Tyr) deacylase; functions in protein translation, may affect nonsense suppression via alteration of the protein synthesis machinery; ubiquitous among eukaryotes
YDR237W	MRPL7	10.5917	8.48584	-2.1059	0.0612359	0.191041	-4.39022	-2.78175	1.60847	0.00136757	0.0249487								X		X			Mitochondrial ribosomal protein of the large subunit; MRPL7 produces both YmL5 and YmL7, which are two different modified forms of the same protein			GPI-anchored protein of unknown function; possible role in apical bud growth; GPI-anchoring on the plasma membrane crucial to function; phosphorylated in mitochondria; similar to Sps2p; ECM33 has a paralog, PST1, that arose from the whole genome duplication
YDR250C	YDR250C	-1.19857	0.329761	1.52834	0.00494697	0.0462007	0.535223	0.123307	-0.411916	0.23602	0.401321														ELP3	ELP3	Subunit of Elongator complex; Elongator is required for modification of wobble nucleosides in tRNA; exhibits histone acetyltransferase activity that is directed to histones H3 and H4; disruption confers resistance to K. lactis zymotoxin; human homolog ELP3 can partially complement yeast elp3 null mutant
YDR262W	YDR262W	0.393274	-0.442376	-0.835649	0.0323057	0.135595	1.05331	2.27492	1.22161	0.000324692	0.0102425								X								Protein proposed to be involved in vacuolar functions; mutant shows defect in CPY processing and fragmented vacuoles; deletion mutant has increased glycogen accumulation and displays elongated buds; green fluorescent protein (GFP)-fusion protein localizes to the nucleus; ENV11 has a paralog, VID22, that arose from the whole genome duplication
YDR296W	MHR1	21.255	11.17	-10.085	0.000715511	0.015394	-16.7134	-12.2255	4.4879	0.0114876	0.0874084										X			Mitochondrial ribosomal protein of the large subunit; also involved in homologous recombination in mitochondria; required for recombination-dependent mtDNA partitioning; involved in stimulation of mitochondrial DNA replication in response to oxidative stress		EXO5	Mitochondrial 5'-3' exonuclease and sliding exonuclease; required for mitochondrial genome maintenance; distantly related to the RecB nuclease domain of bacterial RecBCD recombinases; may be regulated by the transcription factor Ace2
YDR354W	TRP4	1.12603	0.0119523	-1.11408	0.00143996	0.0241814	1.39791	1.93288	0.534974	0.068112	0.222271													Anthranilate phosphoribosyl transferase; transferase of the tryptophan biosynthetic pathway; catalyzes the phosphoribosylation of anthranilate; subject to the general control system of amino acid biosynthesis			CAAX box containing protein of unknown function; proposed to be involved in the RAS/cAMP signaling pathway
YDR400W	URH1	0.258878	0.278208	0.0193294	0.197921	0.346719	-0.21989	0.381132	0.601022	0.00209075	0.0329768						X							Uridine nucleosidase (uridine-cytidine N-ribohydrolase); cleaves N-glycosidic bonds in nucleosides; involved in the pyrimidine salvage and nicotinamide riboside salvage pathways			Subunit of the trimeric GatFAB AmidoTransferase(AdT) complex; involved in the formation of Q-tRNAQ; transposon insertion mutant is salt sensitive and null mutant has growth defects; non-tagged protein is detected in purified mitochondria
YDR436W	PPZ2	-0.0376853	-1.5886	-1.55091	0.0186345	0.100109	2.13378	0.770358	-1.36342	0.000515768	0.0140714													Serine/threonine protein phosphatase Z, isoform of Ppz1p; involved in regulation of potassium transport, which affects osmotic stability, cell cycle progression, and halotolerance			Multifunctional enzyme containing phosphoribosyl-ATP pyrophosphatase; phosphoribosyl-AMP cyclohydrolase, and histidinol dehydrogenase activities; catalyzes the second, third, ninth and tenth steps in histidine biosynthesis
YDR444W	YDR444W	0.710426	1.10876	0.398335	0.516969	0.534275	0.0893374	1.51682	1.42748	5.88667e-06	0.000445673														HINT1	HINT1,HINT2	Adenosine 5'-monophosphoramidase; interacts physically and genetically with Kin28p, a CDK and TFIIK subunit, and genetically with CAK1; member of histidine triad (HIT) superfamily of nucleotide-binding proteins; protein abundance increases in response to DNA replication stress; human homolog HINT1 can complement yeast hnt1 mutant
YDR455C	YDR455C	1.06559	-0.0744191	-1.14001	0.000616479	0.0147128	0.927937	0.632282	-0.295655	0.0796527	0.238121																Cytoplasmic protein containing a zinc finger domain; sequence similarity to that of Type I J-proteins; computational analysis of large-scale protein-protein interaction data suggests a possible role in actin patch assembly
YDR461W	MFA1	-0.0771133	-0.10919	-0.0320764	0.667354	0.584115	-0.420107	0.342358	0.762465	0.000289753	0.00923659						X							Mating pheromone a-factor; made by a cells; interacts with alpha cells to induce cell cycle arrest and other responses leading to mating; biogenesis involves C-terminal modification, N-terminal proteolysis, and export; also encoded by MFA2
YDR515W	SLF1	-0.892355	-0.517191	0.375163	0.477402	0.515463	1.92278	1.26438	-0.658405	0.000486315	0.0136364													RNA binding protein that associates with polysomes; may be involved in regulating mRNA translation; involved in the copper-dependent mineralization of copper sulfide complexes on cell surface in cells cultured in copper salts; SLF1 has a paralog, SRO9, that arose from the whole genome duplication; protein abundance increases in response to DNA replication stress		MRPL49	Mitochondrial ribosomal protein of the large subunit; conserved in metazoa, with similarity to human mitochondrial ribosomal protein MRPL49
YDR532C	KRE28	-2.52505	-0.233419	2.29163	7.92861e-05	0.00442857	0.629696	-0.232664	-0.86236	0.426953	0.524317						X							Subunit of a kinetochore-microtubule binding complex; complex bridges centromeric heterochromatin and kinetochore MAPs and motors; required for sister chromatid bi-orientation and kinetochore binding of SAC components; complex also includes Spc105p; modified by sumoylation	IPPK	IPPK	Inositol 1,3,4,5,6-pentakisphosphate 2-kinase; nuclear protein required for synthesis of 1,2,3,4,5,6-hexakisphosphate (phytate), which is integral to cell function; has 2 motifs conserved in other fungi; ipk1 gle1 double mutant is inviable; human IPPK can complement ipk1 null mutant
YEL001C	IRC22	-1.98905	-0.740155	1.2489	0.0260036	0.121231	2.8197	2.00433	-0.815367	0.00381606	0.0473623													Protein of unknown function; green fluorescent protein (GFP)-fusion localizes to the ER; YEL001C is non-essential; null mutant displays increased levels of spontaneous Rad52p foci			Protein of unknown function; green fluorescent protein (GFP)-fusion localizes to the ER; YEL001C is non-essential; null mutant displays increased levels of spontaneous Rad52p foci
YEL040W	UTR2	1.1374	0.247978	-0.889425	0.000628127	0.0147128	1.53693	2.41136	0.874427	0.0140821	0.0984345						X	X						Chitin transglycosylase; functions in the transfer of chitin to beta(1-6) and beta(1-3) glucans in the cell wall; similar to and functionally redundant with Crh1; glycosylphosphatidylinositol (GPI)-anchored protein localized to bud neck		RBMX2	Component of the U2 snRNP; required for the first catalytic step of splicing and for spliceosomal assembly; interacts with Rds3p and is required for Mer1p-activated splicing; diploid mutants have a specific defect in MATa1 pre-mRNA splicing which leads to haploid gene expression in diploids
YEL043W	YEL043W	-2.12505	-1.5153	0.609752	0.569591	0.553276	1.12234	0.293457	-0.82888	1.17009e-05	0.000805328													Predicted cytoskeleton protein involved in intracellular signaling; based on quantitative analysis of protein-protein interaction maps; may interact with ribosomes, based on co-purification studies; contains fibronectin type III domain fold	ISCU	ISCU	Mitochondrial protein required for iron-sulfur protein synthesis; performs scaffolding function during Fe/S cluster assembly; involved in Fe-S cluster assembly for both mitochondrial and cytosolic proteins; protein abundance increases under DNA replication stress; ISU2 has a paralog, ISU1, that arose from the whole genome duplication; isu1 isu2 double mutant is inviable; human homolog ISCU implic…
YER001W	MNN1	1.06367	0.2954	-0.768274	0.00538614	0.0483743	3.69023	3.15781	-0.532423	0.842347	0.670414						X							Alpha-1,3-mannosyltransferase; integral membrane glycoprotein of the Golgi complex, required for addition of alpha1,3-mannose linkages to N-linked and O-linked oligosaccharides, one of five S. cerevisiae proteins of the MNN1 family		TNPO3	Karyopherin beta; responsible for import of the Toa1p-Toa2p complex into the nucleus; binds to nucleoporins Nup1p and Nup2p; may play a role in regulation of pleiotropic drug resistance
YER056C	FCY2	-3.00331	-3.50358	-0.500272	0.135699	0.291522	-0.553143	-1.97273	-1.41959	2.93917e-05	0.00167941								X					Purine-cytosine permease; mediates purine (adenine, guanine, and hypoxanthine) and cytosine accumulation; relative distribution to the vacuole increases upon DNA replication stress			Cell wall glycoprotein involved in beta-glucan assembly; serves as a K1 killer toxin membrane receptor
YER068C-A	YER068C-A	10.1099	7.42181	-2.68813	0.000383708	0.0113083	-4.43364	-2.75802	1.67562	6.78309e-05	0.00326057															CERK,CERKL,SPHK1,SPHK2	Minor sphingoid long-chain base kinase; possibly involved in synthesis of long-chain base phosphates, which function as signaling molecules; LCB5 has a paralog, LCB4, that arose from the whole genome duplication
YER091C-A	YER091C-A	2.92904	1.648	-1.28104	0.00389701	0.0402805	-0.630687	-0.00616937	0.624517	0.0217571	0.120454															ASPG	Transcription factor; involved in regulation of cell cycle progression from G1 to S phase, forms a complex with Swi6p that binds to MluI cell cycle box regulatory element in promoters of DNA synthesis genes
YER118C	SHO1	0.770694	-0.472335	-1.24303	0.000225025	0.00875548	0.255574	1.22926	0.973684	9.57045e-05	0.00402538						X	X						Transmembrane osmosensor for filamentous growth and HOG pathways; involved in activation of the Cdc42p- and MAP kinase-dependent filamentous growth pathway and the high-osmolarity glycerol (HOG) response pathway; phosphorylated by Hog1p; interacts with Pbs2p, Msb2p, Hkr1p, and Ste11p		MDH2	Cytoplasmic malate dehydrogenase; one of three isozymes that catalyze interconversion of malate and oxaloacetate; involved in the glyoxylate cycle and gluconeogenesis during growth on two-carbon compounds; interacts with Pck1p and Fbp1
YFL028C	CAF16	1.16314	-0.422759	-1.5859	2.39336e-05	0.00204456	1.76193	2.28498	0.523043	0.0328787	0.152947													Part of evolutionarily-conserved CCR4-NOT regulatory complex; contains single ABC-type ATPase domain but no transmembrane domain; interacts with several subunits of Mediator		GFM2	Mitochondrial elongation factor involved in translational elongation
YFR024C	YFR024C	-1.44638	-1.42625	0.0201239	0.356072	0.45592	-0.950426	-0.31974	0.630686	0.00259155	0.0370196																Mating pheromone a-factor; made by a cells; interacts with alpha cells to induce cell cycle arrest and other responses leading to mating; biogenesis involves C-terminal modification, N-terminal proteolysis, and export; also encoded by MFA2
YFR036W	CDC26	1.17581	0.176894	-0.998913	0.00200464	0.0284023	1.9599	1.7208	-0.239102	0.886513	0.684063								X					Subunit of the Anaphase-Promoting Complex/Cyclosome (APC/C); which is a ubiquitin-protein ligase required for degradation of anaphase inhibitors, including mitotic cyclins, during the metaphase/anaphase transition; relocalizes to the cytosol in response to hypoxia		IMMT	Component of the MICOS complex; MICOS (formerly MINOS or MitOS) is a mitochondrial inner membrane complex that extends into the intermembrane space and has a role in the maintenance of crista junctions, inner membrane architecture, and formation of contact sites to the outer membrane; Mic60p is also involved in import of intermembrane space (IMS) proteins, probably by positioning Mia40p relative …
YGL010W	MPO1	-1.35752	-1.01969	0.33783	0.313259	0.42938	3.03183	1.15734	-1.87449	2.7983e-07	3.36183e-05							X	X					Protein involved in metabolism of phytosphingosine; not an essential gene		EGR1,EGR2,EGR3,EGR4,WT1	Transcriptional regulator; partially nonfunctional in S288C strains but has a major role in catabolite repression and ethanol response in some other strains; involved in response to toxic agents; phosphorylation by Snf1p or the Mec1p pathway inactivates Mig3p, allowing induction of damage response genes
YGL025C	PGD1	0.813031	2.86129	2.04826	0.00147895	0.0245463	0.610516	0.56066	-0.0498559	0.739981	0.639066													Subunit of the RNA polymerase II mediator complex; associates with core polymerase subunits to form the RNA polymerase II holoenzyme; essential for basal and activated transcription; direct target of Cyc8p-Tup1p transcriptional corepressor		EME1,EME2	Subunit of structure-specific Mms4p-Mus81p endonuclease; cleaves branched DNA; involved in recombination, DNA repair, and joint molecule formation/resolution during meiotic recombination; phosphorylation of the non-catalytic subunit Mms4p by Cdc28p and Cdc5p during mitotic cell cycle activates the function of Mms4p-Mus81p
YGL152C	YGL152C	-2.39801	-1.62998	0.768033	0.0673902	0.203255	0.962504	-0.320449	-1.28295	0.00219414	0.0339012																Mitochondrial ribosomal protein of the small subunit; contains twin cysteine-x9-cysteine motifs; oxidized by Mia40p during import into mitochondria
YGL177W	YGL177W	0.226757	0.594582	0.367825	0.103796	0.254409	-0.159143	0.326547	0.48569	0.00393019	0.0483822															MRPL23	Mitochondrial ribosomal protein of the large subunit
YGL199C	YGL199C	-0.190321	0.432192	0.622513	0.00185784	0.0272992	-0.0190193	0.12138	0.140399	0.693692	0.625114															MRPS21	Mitochondrial ribosomal protein of the small subunit; MRP21 exhibits genetic interactions with mutations in the COX2 and COX3 mRNA 5'-untranslated leader sequences
YGL214W	YGL214W	-2.11269	-3.13823	-1.02555	0.0321844	0.135477	-0.975349	-2.02662	-1.05127	0.000125161	0.00501415																Mitochondrial ribosomal protein of the large subunit
YGL218W	YGL218W	14.2512	10.223	-4.02817	0.00130181	0.0226414	-13.1266	-12.019	1.1076	0.119345	0.29576															MRPL46	Mitochondrial ribosomal protein of the large subunit
YGL235W	YGL235W	0.278856	1.26723	0.98837	1.94605e-05	0.00179769	-0.830142	-0.366753	0.463389	0.202717	0.375551																Mitochondrial ribosomal protein of the large subunit; mutation confers increased replicative lifespan
YGL262W	YGL262W	-0.295355	0.389792	0.685147	0.0774904	0.219795	-0.537911	-0.212146	0.325765	0.00244103	0.0359486															MRPL30	Mitochondrial ribosomal protein of the large subunit
YGR012W	MCY1	0.0270639	-0.536627	-0.563691	0.00268809	0.0337988	1.96939	2.12872	0.159333	0.185572	0.360473						X				X			Putative cysteine synthase; localized to the mitochondrial outer membrane		MRPL38,PEBP1,PEBP4	Mitochondrial ribosomal protein of the large subunit
YGR051C	YGR051C	-1.25288	-0.209502	1.04338	0.000922532	0.0183527	1.66703	1.07018	-0.596855	0.0844506	0.246384															MRPL47	Mitochondrial ribosomal protein of the large subunit; homolog of prokaryotic L29 ribosomal protein; located at the ribosomal tunnel exit
YGR071C	ENV11	-0.929035	-1.6844	-0.755366	0.00551574	0.0491424	-1.72398	-1.06977	0.654209	0.0190608	0.113713													Protein proposed to be involved in vacuolar functions; mutant shows defect in CPY processing and fragmented vacuoles; deletion mutant has increased glycogen accumulation and displays elongated buds; green fluorescent protein (GFP)-fusion protein localizes to the nucleus; ENV11 has a paralog, VID22, that arose from the whole genome duplication			Mitochondrial ribosomal protein of the large subunit; protein abundance increases in response to DNA replication stress
YGR076C	MRPL25	13.6128	10.1237	-3.48908	0.0130298	0.0817383	-2.88031	0.0568524	2.93716	0.00134146	0.024649										X			Mitochondrial ribosomal protein of the large subunit; mutation confers increased replicative lifespan		MRPL21	Mitochondrial ribosomal protein of the large subunit
YGR089W	NNF2	-1.40355	-1.58421	-0.180664	0.712533	0.599818	1.65578	0.790453	-0.865326	0.000984538	0.0194871													Protein that exhibits physical and genetic interactions with Rpb8p; Rpb8p is a subunit of RNA polymerases I, II, and III; computational analysis of large-scale protein-protein interaction data suggests a role in chromosome segregation		MRPL43,NDUFA2	Mitochondrial ribosomal protein of the large subunit
YGR102C	GTF1	14.5276	8.07538	-6.45226	0.000117231	0.00587065	-10.5865	-6.44674	4.13976	0.0214933	0.120454										X			Subunit of the trimeric GatFAB AmidoTransferase(AdT) complex; involved in the formation of Q-tRNAQ; transposon insertion mutant is salt sensitive and null mutant has growth defects; non-tagged protein is detected in purified mitochondria			Mitochondrial ribosomal protein of the large subunit; MRPL7 produces both YmL5 and YmL7, which are two different modified forms of the same protein
YGR150C	CCM1	12.635	9.23637	-3.39859	0.00382394	0.0397376	-6.73522	-5.37751	1.35771	0.00801321	0.0695664										X			Mitochondrial 15S rRNA-binding protein; required for intron removal of COB and COX1 pre-mRNAs; has separable roles in stabilizing mitochondrial 15S rRNA and in maturation of the COB and COX1 mRNAs; contains pentatricopeptide repeat (PPR) motifs; mutant is respiratory deficient and has defective plasma membrane electron transport		MRPS15	Mitochondrial ribosomal protein of the small subunit
YGR153W	YGR153W	0.837696	0.816343	-0.0213529	0.207788	0.353347	0.98389	1.8185	0.834613	0.000185277	0.00676005						X										Mitochondrial ribosomal protein of the small subunit
YGR161C	RTS3	0.707565	-1.10965	-1.81721	0.00192788	0.0279975	1.98515	1.79999	-0.185161	0.382484	0.501268							X								MRS2	Mitochondrial inner membrane Mg(2+) channel; required for maintenance of intramitochondrial Mg(2+) concentrations at the correct level to support splicing of group II introns; similar to bacterial CorA
YGR166W	TRS65	-1.04909	0.984054	2.03314	0.0035228	0.037896	2.85686	1.88344	-0.973418	0.024994	0.130277													Component of transport protein particle (TRAPP) complex II; TRAPPII is a multimeric guanine nucleotide-exchange factor for the GTPase Ypt1p, regulating intra-Golgi and endosome-Golgi traffic; role in cell wall beta-glucan biosynthesis and the stress response		LRPPRC
YGR174C	CBP4	15.3121	11.4562	-3.85594	0.00439111	0.0423551	-6.09004	-3.85347	2.23656	0.113538	0.287486										X			Mitochondrial protein required for assembly of cytochrome bc1 complex; interacts with the Cbp3p-Cbp6p complex and newly synthesized cytochrome b (Cobp) to promote assembly of Cobp into the cytochrome bc1 complex
YGR268C	HUA1	0.0185127	-0.751393	-0.769905	0.00153376	0.024887	0.593291	0.0945384	-0.498753	0.32329	0.46344													Cytoplasmic protein containing a zinc finger domain; sequence similarity to that of Type I J-proteins; computational analysis of large-scale protein-protein interaction data suggests a possible role in actin patch assembly		WARS2	Mitochondrial tryptophanyl-tRNA synthetase
YGR269W	YGR269W	0.982896	0.305601	-0.677295	0.0806197	0.225587	0.298121	1.34154	1.04342	0.00176561	0.0297049															MTHFD2,MTHFD2L	NAD-dependent 5,10-methylenetetrahydrafolate dehydrogenase; plays a catalytic role in oxidation of cytoplasmic one-carbon units; expression is regulated by Bas1p and Bas2p, repressed by adenine, and may be induced by inositol and choline
YHL005C	YHL005C	12.9436	9.48711	-3.45645	0.00366169	0.0391005	-2.46878	-1.50581	0.96297	0.322986	0.46344					X										DIMT1,TFB1M,TFB2M	Mitochondrial RNA polymerase specificity factor; has structural similarity to S-adenosylmethionine-dependent methyltransferases and functional similarity to bacterial sigma-factors; Mtf1p interacts with and stabilizes the Rpo41p-promoter complex, enhancing DNA bending and melting to facilitate pre-initiation open complex formation
YHR001W-A	QCR10	1.33891	0.388686	-0.95022	0.000714225	0.015394	2.76192	3.11216	0.350244	0.481054	0.546477										X			Subunit of the ubiqunol-cytochrome c oxidoreductase complex; this complex comprises part of the mitochondrial respiratory chain; members include Cobp, Rip1p, Cyt1p, Cor1p, Qcr2p, Qcr6p, Qcr7p, Qcr8p, Qcr9p, and Qcr10p and comprises part of the mitochondrial respiratory chain		ANKRD1,ANKRD2,ANKRD23,ANKRD54,ASB8,PSMD10	Evolutionarily conserved 19S regulatory particle assembly-chaperone; proteasome-interacting protein involved in the assembly of the base subcomplex of the 19S proteasomal regulatory particle (RP); ortholog of human oncoprotein gankyrin, also known as p28, which interacts with the Rb tumor suppressor and CDK4/6
YHR006W	STP2	2.12051	0.774886	-1.34563	0.000382134	0.0113083	0.380311	0.191373	-0.188939	0.502509	0.554076						X							Transcription factor; activated by proteolytic processing in response to signals from the SPS sensor system for external amino acids; activates transcription of amino acid permease genes; STP2 has a paralog, STP1, that arose from the whole genome duplication			Protein involved in the HOG (high osmolarity glycerol) pathway; negatively regulates Hog1p by recruitment of phosphatase Ptc1p to the Pbs2p-Hog1p complex; interacts with Bck1p and down regulates the cell wall integrity pathway; found in the nucleus and cytoplasm; contains an SH3 domain and a Ptc1p binding domain (PBM)
YHR015W	MIP6	0.38852	0.0884315	-0.300088	0.0903366	0.237665	0.230447	1.12528	0.894831	3.46189e-05	0.00190615													Putative RNA-binding protein; interacts with Mex67p, which is a component of the nuclear pore involved in nuclear mRNA export; MIP6 has a paralog, PES4, that arose from the whole genome duplication	MT-ND4		NADH:ubiquinone oxidoreductase; transfers electrons from NADH to ubiquinone in respiratory chain but does not pump protons, in contrast to higher eukaryotic multisubunit respiratory complex I; upon apoptotic stress, is activated in mitochondria by N-terminal cleavage, then translocates to cytoplasm to induce apoptosis; homolog of human AIFM2; yeast NDI1 complements several phenotypes of human cel…
YHR043C	DOG2	0.26215	1.6942	1.43205	0.00158596	0.0253798	-0.596933	-0.307126	0.289807	0.120102	0.296599													2-deoxyglucose-6-phosphate phosphatase; member of a family of low molecular weight phosphatases, induced by oxidative and osmotic stress, confers 2-deoxyglucose resistance when overexpressed; DOG2 has a paralog, DOG1, that arose from a single-locus duplication; the last half of DOG1 and DOG2 are subject to gene conversions among S. cerevisiae, S. paradoxus, and S. mikatae		CEP350,CLIP1,CLIP2,CLIP3,CLIP4,DCTN1	Large subunit of the dynactin complex; dynactin is involved in partitioning the mitotic spindle between mother and daughter cells; putative ortholog of mammalian p150(glued)
YHR147C	MRPL6	14.1294	5.00916	-9.12023	0.00250292	0.0329403	-10.0968	-6.16362	3.9332	0.0942213	0.261296					X					X			Mitochondrial ribosomal protein of the large subunit	CBR4	DECR1,HSD17B8,HSDL2	Mitochondrial 3-oxoacyl-[acyl-carrier-protein] reductase; may comprise a type II mitochondrial fatty acid synthase along with Mct1p; human homolog CBR4 complements yeast null mutant
YIL009C-A	EST3	1.26776	0.522262	-0.745497	0.0090714	0.0665349	1.55998	2.85692	1.29694	0.000703005	0.0163765													Component of the telomerase holoenzyme; involved in telomere replication; synthesis of the full-length protein results from a programmed +1 ribosomal frameshift		OTUD1,OTUD6A,OTUD6B	Protein of unknown function; may interact with ribosomes, based on co-purification experiments; member of the ovarian tumor-like (OTU) superfamily of predicted cysteine proteases; shows cytoplasmic localization; protein abundance increases in response to DNA replication stress
YIL028W	YIL028W	-1.729	-1.47821	0.250789	0.906338	0.657764	3.22018	2.43519	-0.784992	0.00389004	0.0480834															DNAI2	Dynein intermediate chain, microtubule motor protein; required for intracellular transport and cell division; acts in cytoplasmic dynein pathway; forms complex with dynein light chain Dyn2p that promotes Dyn1p homodimerization and potentiates motor processivity; Dyn2p-Pac11p complex is also important for interaction of dynein motor complex with dynactin complex; forms cortical cytoplasmic microtu…
YIL039W	TED1	3.67241	5.39944	1.72704	0.00412518	0.0414123	0.159552	-1.2197	-1.37925	0.479156	0.546477													GPI-glycan remodelase; conserved phosphoesterase domain-containing protein; acts together with Emp24p/Erv25p in cargo exit from the ER; functional ortholog of mammalian GPI-glycan remodelase PGAP5; deletion confers sensitivity to 4-(N-(S-glutathionylacetyl)amino) phenylarsenoxide (GSAO)			Low complexity protein; mediates inhibition of Mep1p and Mep3p activity; hyperphosphorylated upon rapamycin treatment in a Tap42p-dependent manner; green fluorescent protein (GFP)-fusion protein localizes to the cytoplasm; phosphorylation and localization regulated by TORC1-effector kinase, Npr1p
YIL086C	YIL086C	0.261297	-0.0158838	-0.277181	0.230109	0.371603	0.0509935	-0.514059	-0.565052	0.003323	0.0431898																Phosphatidylinositol transfer protein (PITP); controlled by the multiple drug resistance regulator Pdr1p; localizes to lipid particles and microsomes; controls levels of various lipids, may regulate lipid synthesis; homologous to Pdr17p; protein abundance increases in response to DNA replication stress
YIL130W	ASG1	-0.499538	-1.16463	-0.665089	0.110512	0.261872	-1.11289	0.716511	1.8294	0.000123499	0.00501415									X				Zinc cluster protein proposed to be a transcriptional regulator; regulator involved in the stress response; null mutants have a respiratory deficiency, calcofluor white sensitivity and slightly increased cycloheximide resistance		GATB	Subunit of the trimeric GatFAB AmidoTransferase(AdT) complex; involved in the formation of Q-tRNAQ; mutation is functionally complemented by the bacterial GatB ortholog
YIL152W	YIL152W	0.552497	-0.976011	-1.52851	1.85667e-06	0.000269634	1.87935	2.42631	0.546961	0.0483081	0.18841																Protein of unknown function; required for efficient 5' processing of mitochondrial tRNAs, for respiratory growth and mitochondrial genome maintenance; localizes to the matrix side of the inner mitochondrial membrane
YIL163C	YIL163C	0	-0.60905	-0.60905	0.133433	0.288574	0.556411	1.54805	0.991636	4.67458e-05	0.00244074																Putative peroxisomal membrane protein; required for import of peroxisomal proteins; functionally complements a Pichia pastoris pex22 mutation
YIR043C	YIR043C	-3.85782	-3.07998	0.777837	0.073412	0.214454	2.09379	1.45367	-0.640113	0.00217977	0.0338519																Low-affinity vacuolar phosphate transporter; exports phosphate from the vacuolar lumen to the cytosol; regulates phosphate and polyphosphate metabolism; acts upstream of Pho81p in regulation of the PHO pathway; localizes to sites of contact between the vacuole and mitochondria (vCLAMPs); deletion of pho84, pho87, pho89, pho90, and pho91 causes synthetic lethality; transcription independent of Pi …
YJL007C	YJL007C	3.31264	6.103	2.79036	0.0017102	0.0261434	-0.271177	-1.53222	-1.26104	0.0287388	0.142674																Exomer-dependent cargo protein; induces appearance of [PIN+] prion when overproduced; prion-like domain serves as a retention signal in the trans-Golgi network; predicted to be palmitoylated
YJL023C	PET130	14.4837	9.59796	-4.88575	0.00113331	0.0207169	-4.07523	-1.16603	2.90921	0.00319482	0.0420654										X			Protein of unknown function; required for efficient 5' processing of mitochondrial tRNAs, for respiratory growth and mitochondrial genome maintenance; localizes to the matrix side of the inner mitochondrial membrane		POMT1,POMT2	Protein O-mannosyltransferase of the ER membrane; transfers mannose residues from dolichyl phosphate-D-mannose to protein serine/threonine residues; involved in ER quality control; acts in a complex with Pmt1p, can instead interact with Pmt5p; antifungal drug target; PMT2 has a paralog, PMT3, that arose from the whole genome duplication
YJL047C	RTT101	-5.98649	-5.06216	0.924326	0.821038	0.633795	-1.91419	-4.30245	-2.38825	6.97304e-07	6.88545e-05					X								Cullin subunit of a Roc1p-dependent E3 ubiquitin ligase complex; role in anaphase progression; required for recovery after DSB repair; implicated in Mms22-dependent DNA repair; involved with Mms1p in nonfunctional rRNA decay; modified by the ubiquitin-like protein, Rub1p		CNOT7,CNOT8	RNase of the DEDD superfamily; subunit of the Ccr4-Not complex that mediates 3' to 5' mRNA deadenylation
YJL129C	TRK1	0.718847	1.00827	0.289423	0.0932595	0.242358	0.564919	1.44165	0.876736	0.00196686	0.0313696													Component of the Trk1p-Trk2p potassium transport system; 180 kDa high affinity potassium transporter; phosphorylated in vivo and interacts physically with the phosphatase Ppz1p, suggesting Trk1p acitivy is regulated by phosphorylation; TRK1 has a paralog, TRK2, that arose from the whole genome duplication		PRDX6	Mitochondrial peroxiredoxin with thioredoxin peroxidase activity; has a role in reduction of hydroperoxides; reactivation requires Trr2p and glutathione; induced during respiratory growth and oxidative stress; phosphorylated; protein abundance increases in response to DNA replication stress
YJL147C	SMT1	0.757275	0.77313	0.015855	0.374727	0.463265	0.741099	1.49593	0.754829	0.000364657	0.0111547									X	X					XRCC3	Component of Shu complex (aka PCSS complex); Shu complex also includes Shu1, Csm2, Shu2, and promotes error-free DNA repair; promotes Rad51p filament assembly; Shu complex mediates inhibition of Srs2p function; Psy3p and Csm2p contain similar DNA-binding regions which work together to form a single DNA binding site; deletion of PSY3 results in a mutator phenotype; deletion increases sensitivity t…
YJL150W	YJL150W	-0.681215	0.208898	0.890113	0.00419195	0.0416968	1.14806	1.44284	0.294779	0.516928	0.557858															PTRH1	One of two mitochondrially-localized peptidyl-tRNA hydrolases; dispensable for respiratory growth on rich medium, but required for respiratory growth on minimal medium; see also PTH2
YJL157C	FAR1	0.526727	-0.43168	-0.958407	0.00440395	0.0423551	0.186036	0.636995	0.450958	0.0162613	0.105242						X							CDK inhibitor and nuclear anchor; during the cell cycle Far1p sequesters the GEF Cdc24p in the nucleus; phosphorylation by Cdc28p-Cln results in SCFCdc4 complex-mediated ubiquitin-dependent degradation, releasing Cdc24p for export and activation of GTPase Cdc42p; in response to pheromone, phosphorylation of Far1p by MAPK Fus3p results in association with, and inhibition of Cdc28p-Cln, as well as …		TSSK1B,TSSK2,TSSK3,TSSK4,TSSK6	Putative serine/threonine protein kinase; regulates spermine uptake; involved in polyamine transport; possible mitochondrial protein; PTK1 has a paralog, PTK2, that arose from the whole genome duplication
YJL192C	SOP4	-0.962966	-2.22749	-1.26452	0.00314834	0.0362569	2.15486	2.44186	0.287003	0.825591	0.664786													ER-membrane protein; subunit of evolutionarily conserved EMC (Endoplasmic Reticulum Membrane Complex) implicated in ERAD (ER-associated degradation) and proper assembly of multi-pass transmembrane (TM) proteins; EMC acts in yeast as an ER-mitochondria tether that interacts with outer membrane protein Tom5 of TOM (Translocase of the Mitochondrial Outer Membrane) complex; suppressor of pma1-7, dele…		PUM1,PUM2	Protein of the mitochondrial outer surface; links the Arp2/3 complex with the mitochore during anterograde mitochondrial movement; also binds to and promotes degradation of mRNAs for select nuclear-encoded mitochondrial proteins
YJL211C	YJL211C	-0.61475	0.678824	1.29357	0.00309481	0.0359554	2.66756	1.79532	-0.872244	0.0941871	0.261296																Subunit of the ubiqunol-cytochrome c oxidoreductase complex; this complex comprises part of the mitochondrial respiratory chain; members include Cobp, Rip1p, Cyt1p, Cor1p, Qcr2p, Qcr6p, Qcr7p, Qcr8p, Qcr9p, and Qcr10p and comprises part of the mitochondrial respiratory chain
YJR124C	YJR124C	2.47545	0.45789	-2.01756	4.56049e-06	0.000525263	1.38225	3.55582	2.17357	1.79242e-05	0.00113085							X									Protein involved in nucleotide excision repair; green fluorescent protein (GFP)-fusion protein localizes to the nucleus
YKL072W	STB6	-0.100768	0.655086	0.755855	0.00199862	0.0284023	-1.30285	-0.694938	0.607916	0.025269	0.131033													Protein that binds Sin3p in a two-hybrid assay; STB6 has a paralog, STB2, that arose from the whole genome duplication		RAD51B,RAD51D,XRCC3	Protein that stimulates strand exchange; stimulates strand exchange by stabilizing the binding of Rad51p to single-stranded DNA; involved in the recombinational repair of double-strand breaks in DNA during vegetative growth and meiosis; forms heterodimer with Rad55p
YKL155C	RSM22	13.2696	8.00386	-5.26579	0.00345336	0.037741	-3.44511	-0.415092	3.03001	0.0411967	0.174731										X			Mitochondrial ribosomal protein of the small subunit; also predicted to be an S-adenosylmethionine-dependent RNA methyltransferase		TP53BP1	DNA damage-dependent checkpoint protein; required for cell-cycle arrest in G1/S, intra-S, and G2/M, plays a role in postreplication repair (PRR) pathway; transmits checkpoint signal by activating Rad53p and Chk1p; hyperphosphorylated by Mec1p and Tel1p; multiple cyclin dependent kinase consensus sites and the C-terminal BRCT domain contribute to DNA damage checkpoint activation; Rad9p Chk1 Activa…
YKL169C	YKL169C	17.9187	10.8867	-7.03202	0.00180696	0.0271933	-11.3048	-6.83249	4.47231	0.0163521	0.105488															RAD54B,TTF2	DNA-dependent ATPase; DNA recombination/repair translocase, supercoils DNA and promotes DNA strand opening; stimulates strand exchange by modifying dsDNA topology; involved in recombinational repair of DNA double-strand breaks (DSBs) during mitosis and meiosis; phosphorylated in Mec1p-, Rad53p-dependent way in response to one DSB; contributes to remodelling of nucleosomes; proposed to be involved…
YKL208W	CBT1	13.127	8.16006	-4.96696	0.000325991	0.0107595	-6.18827	-4.89529	1.29298	0.768852	0.648387										X			Protein involved in 5' RNA end processing; substrates include mitochondrial COB, 15S_rRNA, and RPM1 transcripts; may also have a role in 3' end processing of the COB pre-mRNA; displays genetic interaction with cell cycle-regulated kinase Dbf2p			RNA-binding protein; involved in the cleavage step of mRNA 3'-end formation prior to polyadenylation, and in snoRNA maturation; part of holo-CPF subcomplex APT, which associates with 3'-ends of snoRNA- and mRNA-encoding genes; putative regulatory subunit of type 1 protein phosphatase Glc7p, required for actomyosin ring formation, and for timely dephosphorylation and release of Bnr1p from the divi…
YKL217W	JEN1	0.196878	-0.485859	-0.682737	0.0013016	0.0226414	-0.794626	-0.639681	0.154945	0.41481	0.519517										X			Monocarboxylate/proton symporter of the plasma membrane; transport activity is dependent on the pH gradient across the membrane; mediates high-affinity uptake of carbon sources lactate, pyuvate, and acetate, and also of the micronutrient selenite, whose structure mimics that of monocarboxylates; expression and localization are tightly regulated, with transcription repression, mRNA degradation, an…		SSBP1	ssDNA-binding protein essential for mitochondrial genome maintenance; involved in mitochondrial DNA replication; stimulates utilization by Mip1p DNA polymerase of RNA primers synthesized by Rpo41p
YKR065C	PAM17	7.71369	5.04436	-2.66933	0.000283916	0.00984786	-2.53284	-1.58246	0.950389	0.00542514	0.0570461										X			Constituent of the TIM23 complex; proposed alternatively to be a component of the import motor (PAM complex) or to interact with and modulate the core TIM23 (Translocase of the Inner mitochondrial Membrane) complex; protein abundance increases in response to DNA replication stress		MRPL2	Mitochondrial ribosomal protein of the large subunit (L2); has similarity to E. coli L2 ribosomal protein; mutant allele (fat21) causes inability to utilize oleate, and induce oleic acid oxidation; may interfere with activity of the Adr1p transcription factor
YLL012W	YEH1	1.05148	0.0069749	-1.04451	0.153637	0.313037	0.321308	1.30397	0.98266	1.49709e-05	0.00098559						X							Steryl ester hydrolase; one of three gene products (Yeh1p, Yeh2p, Tgl1p) responsible for steryl ester hydrolase activity and involved in sterol homeostasis; localized to lipid particle membranes; YEH1 has a paralog, YEH2, that arose from the whole genome duplication		RPL10A	Ribosomal 60S subunit protein L1B; N-terminally acetylated; homologous to mammalian ribosomal protein L10A and bacterial L1; RPL1B has a paralog, RPL1A, that arose from the whole genome duplication; rpl1a rpl1b double null mutation is lethal
YLL044W	YLL044W	-1.53429	-1.12448	0.409806	0.842101	0.640199	-1.17623	0.25727	1.4335	0.00133359	0.024649							X								POLRMT	Mitochondrial RNA polymerase; single subunit enzyme similar to those of T3 and T7 bacteriophages; requires a specificity subunit encoded by MTF1 for promoter recognition; Mtf1p interacts with and stabilizes the Rpo41p-promoter complex, enhancing DNA bending and melting to facilitate pre-initiation open complex formation; Rpo41p also synthesizes RNA primers for mitochondrial DNA replication
YLR004C	THI73	0.561031	-0.147287	-0.708318	0.00129808	0.0226414	0.241536	0.581516	0.33998	0.0958526	0.26298													Putative plasma membrane permease; proposed to be involved in carboxylic acid uptake and repressed by thiamine; substrate of Dbf2p/Mob1p kinase; transcription is altered if mitochondrial dysfunction occurs		RPS10,RPS10-NUDT3,RPS10P5	Protein component of the small (40S) ribosomal subunit; homologous to mammalian ribosomal protein S10, no bacterial homolog; RPS10A has a paralog, RPS10B, that arose from the whole genome duplication; mutations in the human homolog associated with Diamond-Blackfan anemia
YLR021W	IRC25	-2.94845	-1.1484	1.80006	0.00357968	0.0383658	0.451272	-0.0916776	-0.54295	0.00351353	0.0442508													Component of a heterodimeric Poc4p-Irc25p chaperone; involved in assembly of alpha subunits into the 20S proteasome; may regulate formation of proteasome isoforms with alternative subunits under different conditions; upregulates proteasome assembly in response to the unfolded protein response activated by mistargeting of proteins (UPRam)		RPS17	Ribosomal protein 51 (rp51) of the small (40s) subunit; homologous to mammalian ribosomal protein S17, no bacterial homolog; RPS17B has a paralog, RPS17A, that arose from the whole genome duplication; protein abundance increases in response to DNA replication stress
YLR139C	SLS1	21.8081	10.5384	-11.2697	0.00352087	0.037896	-16.6091	-12.07	4.53913	0.0136378	0.0963667										X			Mitochondrial membrane protein; coordinates expression of mitochondrially-encoded genes; may facilitate delivery of mRNA to membrane-bound translation machinery		PBRM1	Component of the RSC chromatin remodeling complex; required for expression of mid-late sporulation-specific genes; involved in telomere maintenance; RSC2 has a paralog, RSC1, that arose from the whole genome duplication
YLR149C	YLR149C	18.6956	5.57556	-13.12	0.000428094	0.0118419	-20.639	-11.9726	8.66643	0.117094	0.293439							X						Protein of unknown function; overexpression causes a cell cycle delay or arrest; null mutation results in a decrease in plasma membrane electron transport; YLR149C is not an essential gene; protein abundance increases in response to DNA replication stress		MRPS18A,MRPS18C	Mitochondrial ribosomal protein of the small subunit; has similarity to E. coli S18 ribosomal protein
YLR171W	YLR171W	-0.610336	-0.089403	0.520933	0.336138	0.443592	2.07185	1.53523	-0.536616	0.00313822	0.0419168															RPS15	Mitochondrial ribosomal protein of the small subunit; has similarity to E. coli S19 ribosomal protein
YLR202C	YLR202C	14.5435	9.82732	-4.7162	0.000898078	0.0179894	-7.49153	-5.79885	1.69269	0.0723777	0.229449															MRPS35	Mitochondrial ribosomal protein of the small subunit
YLR290C	COQ11	6.83937	2.58256	-4.25682	0.000238745	0.00889018	-3.14924	-1.92177	1.22747	1.75707e-05	0.00113085							X			X			Putative oxidoreductase, subunit of Coenzyme Q biosynthetic complexes; required for synthesis of wild-type levels of Coenzyme Q (ubiquinone); member of the short-chain dehydrogenase/reductase (SDR) superfamily; orthologous gene in some other fungi is fused to the COQ10 ortholog		MCM3AP,SAC3D1	mRNA export factor; required for biogenesis of the small ribosomal subunit; component of TREX-2 complex (Sac3p-Thp1p-Sus1p-Cdc31p) involved in transcription elongation and mRNA export from the nucleus; involved in post-transcriptional tethering of active genes to the nuclear periphery and to non-nascent mRNP; similar to the human germinal center-associated nuclear protein (GANP)
YLR358C	YLR358C	-5.16586	-6.22164	-1.05579	0.049331	0.170945	-3.73884	-6.91728	-3.17843	0.00156109	0.0273267																Endonuclease required for telomere elongation; required for telomeric 5' C-rich strand resection; involved in ds-break repair and processing hairpin DNA structures with the MRX complex; function requires sumoylation and phosphorylation; exists as inactive oligomers that are transiently released into smaller active units by phosphorylation; DNA damage triggers Sae2p removal, so active Sae2p is pre…
YLR368W	MDM30	0.574331	3.95976	3.38542	0.00072371	0.0154559	-3.75285	-3.33128	0.421566	0.921974	0.690549					X					X			F-box component of an SCF ubiquitin protein ligase complex; associates with and is required for Fzo1p ubiquitination and for mitochondria fusion; stimulates nuclear export of specific mRNAs; promotes ubiquitin-mediated degradation of Gal4p in some strains		ALS2	F-Box protein involved in proteasome-dependent degradation of Aah1p; involved in proteasome-dependent degradation of Aah1p during entry of cells into quiescence; interacts with Skp1
YLR374C	YLR374C	-1.14828	-4.26269	-3.1144	0.00237549	0.0317953	-4.34302	-2.78381	1.55921	0.0368806	0.162573																5'- and 3'-flap DNA binding protein; recruits Rad1p-Rad10p to single-strand annealing intermediates with 3' non-homologous tails for removal during double-strand break repair; complexes with Rad1p-Rad10p and stimulates its endonuclease activity; green fluorescent protein (GFP)-fusion protein localizes to the nucleus
YLR402W	YLR402W	-4.88721	-2.68913	2.19808	0.0767951	0.219117	-2.84629	-4.29536	-1.44907	0.00155336	0.0273267															HSF5,HSFX1,HSFY1,HSFY2	Transcriptional repressor and activator; involved in repression of flocculation-related genes, and activation of stress responsive genes; has direct role in INO1 transcriptional memory; negatively regulated by cAMP-dependent protein kinase A subunit Tpk2p; premature stop codon (C1430T, Q477-stop) in SK1 background is linked to the aggressively invasive phenotype of SK1 relative to BY4741 (S288C)
YML006C	GIS4	0.157313	2.27155	2.11424	0.00450151	0.0430085	-2.04645	-2.51451	-0.468056	0.169326	0.347532													CAAX box containing protein of unknown function; proposed to be involved in the RAS/cAMP signaling pathway			Transmembrane osmosensor for filamentous growth and HOG pathways; involved in activation of the Cdc42p- and MAP kinase-dependent filamentous growth pathway and the high-osmolarity glycerol (HOG) response pathway; phosphorylated by Hog1p; interacts with Pbs2p, Msb2p, Hkr1p, and Ste11p
YML076C	WAR1	1.88543	0.11268	-1.77275	1.4844e-05	0.0014867	1.21034	1.76848	0.558142	0.0432165	0.17801										X			Homodimeric Zn2Cys6 zinc finger transcription factor; binds to a weak acid response element to induce transcription of PDR12 and FUN34, encoding an acid transporter and a putative ammonia transporter, respectively			Phospholipid-binding hydrophilin; essential to overcome desiccation-rehydration process; expression is induced by osmotic stress; SIP18 has a paralog, GRE1, that arose from the whole genome duplication
YML081C-A	ATP18	12.0286	9.08861	-2.94	0.00438885	0.0423551	-4.5538	-2.33888	2.21492	0.146466	0.324897										X			Subunit of the mitochondrial F1F0 ATP synthase; F1F0 ATP synthase is a large, evolutionarily conserved enzyme complex required for ATP synthesis; termed subunit I or subunit j; does not correspond to known ATP synthase subunits in other organisms			Inositol phosphatase involved in inositol pyrophosphate metabolism; hydrolyzes the beta-phosphate from the 5-diphosphate group of PP-InsPs including: 5PP-IP5 (IP7), 1,5PP-IP4 (IP8) and 5-PP-InsP4; localizes to the cytoplasm; null mutant displays an altered response to environmental stress, to nutrient deprivation in stationary phase, and has defects in actin organization and endocytosis; member o…
YML090W	YML090W	11.6659	8.8281	-2.83784	0.000750542	0.0157967	-6.2219	-4.83385	1.38805	0.139093	0.317037															TTC32,TTC37	Ski complex component and TPR protein; mediates 3'-5' RNA degradation by the cytoplasmic exosome; null mutants have superkiller phenotype of increased viral dsRNAs and are synthetic lethal with mutations in 5'-3' mRNA decay; mutations in the human ortholog, TTC37, causes Syndromic diarrhea/Trichohepatoenteric (SD/THE) syndrome
YML095C-A	YML095C-A	-1.02841	-2.94649	-1.91808	0.000272044	0.00975493	0.170701	-1.47097	-1.64167	2.09947e-05	0.00129754																Mitochondrial membrane protein; coordinates expression of mitochondrially-encoded genes; may facilitate delivery of mRNA to membrane-bound translation machinery
YMR062C	ARG7	3.72459	4.71182	0.987232	5.17651e-05	0.00357979	-1.77328	-1.55222	0.221061	0.243669	0.409417										X			Mitochondrial ornithine acetyltransferase; catalyzes the fifth step in arginine biosynthesis; also possesses acetylglutamate synthase activity, regenerates acetylglutamate while forming ornithine			Protein involved in SRP-independent targeting of substrates to the ER; component of an alternative ER targeting pathway that has partial functional redundancy with the GET pathway; preference for substrates with downstream transmembrane domains; interacts with Snd1p, Env10p/Snd2p, and Sec61p-translocon subunits; can compensate for loss of SRP; role in phosphate transport, interacting with pho88, …
YMR063W	RIM9	3.27631	4.55325	1.27694	0.000511029	0.0127955	-1.82192	-1.3328	0.489111	0.0302491	0.144716													Plasma membrane protein of unknown function; involved in the proteolytic activation of Rim101p in response to alkaline pH; interacts with Rim21p and Dfg16p to form a pH-sensing complex in the Rim101 pathway and is required to maintain Rim21p levels; has similarity to A. nidulans PalI;		PRKAG1,PRKAG2,PRKAG3	Activating gamma subunit of the AMP-activated Snf1p kinase complex; additional subunits of the complex are Snf1p and a Sip1p/Sip2p/Gal83p family member; activates glucose-repressed genes, represses glucose-induced genes; role in sporulation, and peroxisome biogenesis; protein abundance increases in response to DNA replication stress
YMR098C	ATP25	12.5849	8.96144	-3.6235	0.000495963	0.0126361	-6.90444	-4.30587	2.59857	0.00224187	0.0344628										X			Mitochondrial protein required for the stability of Oli1p (Atp9p) mRNA; also required for the Oli1p ring formation; YMR098C is not an essential gene		CHMP4A,CHMP4B,CHMP4BP1,CHMP4C,CHMP7	One of four subunits of the ESCRT-III complex; involved in the sorting of transmembrane proteins into the multivesicular body (MVB) pathway; recruited from the cytoplasm to endosomal membranes; ESCRT-III stands for endosomal sorting complex required for transport III
YMR107W	SPG4	0.976443	0.217767	-0.758676	0.00166202	0.0256772	1.49206	1.98608	0.494018	0.257138	0.418659													Protein required for high temperature survival during stationary phase; not required for growth on nonfermentable carbon sources	SOD1, SOD2	SOD2	Mitochondrial manganese superoxide dismutase; protects cells against oxygen toxicity and oxidative stress; human mitochondrial SOD2 can complement a yeast null mutant and human cytoplasmic SOD1 can also complement when targeted to the mitochondrial matrix
YMR148W	LDO16	1.10469	0.155299	-0.949389	0.00479705	0.0453843	1.15722	1.3577	0.200477	0.0296504	0.143428													Protein of unknown function with possible role in spore wall assembly; predicted to contain an N-terminal transmembrane domain; osw5 null mutant spores exhibit increased spore wall permeability and sensitivity to beta-glucanase digestion			ER-membrane protein; subunit of evolutionarily conserved EMC (Endoplasmic Reticulum Membrane Complex) implicated in ERAD (ER-associated degradation) and proper assembly of multi-pass transmembrane (TM) proteins; EMC acts in yeast as an ER-mitochondria tether that interacts with outer membrane protein Tom5 of TOM (Translocase of the Mitochondrial Outer Membrane) complex; suppressor of pma1-7, dele…
YMR158W	MRPS8	11.5794	7.5105	-4.06886	0.0011536	0.0209414	-5.08682	-3.27777	1.80905	0.00622267	0.0621712										X			Mitochondrial ribosomal protein of the small subunit			Protein required for high temperature survival during stationary phase; not required for growth on nonfermentable carbon sources
YMR164C	MSS11	0.56471	0.440502	-0.124208	0.22639	0.369825	0.5409	1.1747	0.633799	0.000644981	0.0161565													Transcription factor; involved in regulation of invasive growth and starch degradation; controls the activation of FLO11 and STA2 in response to nutritional signals; forms a heterodimer with Flo8p that interacts with the Swi/Snf complex during transcriptional activation of FLO1, FLO11, and STA1			Putative spore wall protein; expression increases during sporulation; not an essential gene; YOR214C has a paralog, SPO19, that arose from the whole genome duplication
YMR166C	MME1	10.6438	8.16533	-2.47847	0.0604056	0.189878	-2.67935	-1.41782	1.26154	0.0013117	0.0245203										X			Transporter of the mitochondrial inner membrane that exports magnesium; involved in mitochondrial Mg2+ homeostasis; has similarity to human mitochondrial ATP-Mg/Pi carriers		LARP1,LARP1B,LARP4,LARP4B	Cytoplasmic RNA-binding protein; shuttles between nucleus and cytoplasm and is exported from the nucleus in an mRNA export-dependent manner; associates with translating ribosomes; involved in heme regulation of Hap1p as a component of the HMC complex, also involved in the organization of actin filaments; contains a La motif; SRO9 has a paralog, SLF1, that arose from the whole genome duplication
YMR175W	SIP18	0.0581583	-0.0146671	-0.0728254	0.431121	0.497832	-0.225516	0.148394	0.37391	0.00358541	0.0446827													Phospholipid-binding hydrophilin; essential to overcome desiccation-rehydration process; expression is induced by osmotic stress; SIP18 has a paralog, GRE1, that arose from the whole genome duplication		HSPA4,HSPA4L,HSPH1,HYOU1	ATPase component of heat shock protein Hsp90 chaperone complex; serves as nucleotide exchange factor to load ATP onto the SSA class of cytosolic Hsp70s; plays a role in prion propagation and determining prion variants; binds unfolded proteins; member of Hsp110 subclass of HSP70 proteins; deletion results in spindle elongation in S phase; SSE1 has a paralog, SSE2, that arose from the whole genome …
YMR175w	SIP18	0.0581583	-0.0146671	-0.0728254	0.431121	0.497832	-0.225516	0.148394	0.37391	0.00358541	0.0446827													Phospholipid-binding hydrophilin; essential to overcome desiccation-rehydration process; expression is induced by osmotic stress; SIP18 has a paralog, GRE1, that arose from the whole genome duplication	MAP3K4	MAP3K4	MAP kinase kinase kinase of HOG1 mitogen-activated signaling pathway; interacts with Ssk1p, leading to autophosphorylation and activation of Ssk2p which phosphorylates Pbs2p; also mediates actin cytoskeleton recovery from osmotic stress; a HOG-independent function of Ssk2p mediates the calcium-sensitive phenotype of the ptp2 msg5 double disruptant; SSK2 has a paralog, SSK22, that arose from the w…
YMR225C	MRPL44	0.290794	1.4441	1.15331	0.00227325	0.0305677	-1.54185	-1.52142	0.0204329	0.123335	0.298077										X			Mitochondrial ribosomal protein of the large subunit; protein abundance increases in response to DNA replication stress			Putative mitochondrial ribosomal protein of the small subunit; has similarity to E. coli S13 ribosomal protein; participates in controlling sporulation efficiency; localizes to vacuole in response to H2O2
YMR232W	FUS2	2.53354	1.02343	-1.51011	0.00080413	0.0164478	2.14461	2.62796	0.483354	0.0177891	0.110458										X			Cell fusion regulator; cytoplasmic protein localized to shmoo tip; required for alignment of parental nuclei before nuclear fusion during mating; contains a Dbl-homology domain; binds specifically with activated Cdc42p			Subunit of TORC1 (Tor1p or Tor2p-Kog1p-Lst8p-Tco89p); regulates global H3K56ac; TORC1 complex regulates growth in response to nutrient availability; cooperates with Ssd1p in the maintenance of cellular integrity; deletion strains are hypersensitive to rapamycin
YNL032W	SIW14	-1.66214	-2.42763	-0.765491	0.335313	0.443288	0.459599	-1.11286	-1.57246	2.47483e-06	0.000208185						X							Inositol phosphatase involved in inositol pyrophosphate metabolism; hydrolyzes the beta-phosphate from the 5-diphosphate group of PP-InsPs including: 5PP-IP5 (IP7), 1,5PP-IP4 (IP8) and 5-PP-InsP4; localizes to the cytoplasm; null mutant displays an altered response to environmental stress, to nutrient deprivation in stationary phase, and has defects in actin organization and endocytosis; member o…		ANPEP,C9orf3,ENPEP,ERAP1,ERAP2,LNPEP,LVRN,TRHDE	Ribosome-associated, nascent chain binding factor; binds N-terminal region of nascent peptides during translation; recognizes target proteins via its putative metallopeptidase peptide-binding pocket
YNL081C	SWS2	-2.29064	-1.82551	0.46513	0.5267	0.536445	1.6983	-7.85751	-9.55581	8.71022e-09	1.75851e-06										X			Putative mitochondrial ribosomal protein of the small subunit; has similarity to E. coli S13 ribosomal protein; participates in controlling sporulation efficiency; localizes to vacuole in response to H2O2		TIMELESS	Subunit of a replication-pausing checkpoint complex; Tof1p-Mrc1p-Csm3p acts at the stalled replication fork to promote sister chromatid cohesion after DNA damage, facilitating gap repair of damaged DNA; interacts with the MCM helicase; relocalizes to the cytosol in response to hypoxia
YNL084C	END3	-2.64013	-1.25273	1.3874	0.00760682	0.0593923	1.05864	-1.09449	-2.15313	0.00148203	0.0264006													EH domain-containing protein involved in endocytosis; actin cytoskeletal organization and cell wall morphogenesis; forms a complex with Sla1p and Pan1p		TOMM7	Component of the TOM (translocase of outer membrane) complex; responsible for recognition and initial import steps for all mitochondrially directed proteins; promotes assembly and stability of the TOM complex
YNL099C	OCA1	0.948977	-0.163861	-1.11284	0.000320874	0.0107124	1.2848	0.630628	-0.654176	0.0115409	0.0875939													Putative protein tyrosine phosphatase; required for cell cycle arrest in response to oxidative damage of DNA		PRKACA,PRKACB,PRKACG,PRKG1,PRKG2,PRKX,PRKY,RPS6KA1,RPS6KA2,RPS6KA3,RPS6KA4,RPS6KA5,RPS6KA6,STK32A,STK32B,STK32C	cAMP-dependent protein kinase catalytic subunit; promotes vegetative growth in response to nutrients via the Ras-cAMP signaling pathway; partially redundant with Tpk1p and Tpk2p; localizes to P-bodies during stationary phase; TPK3 has a paralog, TPK1, that arose from the whole genome duplication
YNL184C	YNL184C	16.0384	10.3367	-5.70167	0.00544338	0.0486469	-7.05704	-3.64895	3.40809	0.0359764	0.161168																Anthranilate phosphoribosyl transferase; transferase of the tryptophan biosynthetic pathway; catalyzes the phosphoribosylation of anthranilate; subject to the general control system of amino acid biosynthesis
YNL231C	PDR16	-0.57141	0.610393	1.1818	0.00436902	0.0423551	-1.11537	-0.931095	0.184276	0.997723	0.705993						X							Phosphatidylinositol transfer protein (PITP); controlled by the multiple drug resistance regulator Pdr1p; localizes to lipid particles and microsomes; controls levels of various lipids, may regulate lipid synthesis; homologous to Pdr17p; protein abundance increases in response to DNA replication stress		PRDX1,PRDX2,PRDX3,PRDX4	Stress inducible cytoplasmic thioredoxin peroxidase; cooperates with Tsa1p in the removal of reactive oxygen, nitrogen and sulfur species using thioredoxin as hydrogen donor; deletion enhances the mutator phenotype of tsa1 mutants; protein abundance increases in response to DNA replication stress; TSA2 has a paralog, TSA1, that arose from the whole genome duplication
YNL322C	KRE1	-0.668803	1.28626	1.95507	0.000290432	0.00984786	-0.258912	-2.11432	-1.85541	0.0199428	0.116159													Cell wall glycoprotein involved in beta-glucan assembly; serves as a K1 killer toxin membrane receptor			Protein of unknown function; transcript accumulates in response to any combination of stress conditions
YNR013C	PHO91	0.342177	-2.38284	-2.72502	0.00095938	0.0188278	3.75539	2.3422	-1.41319	0.0156048	0.103573													Low-affinity vacuolar phosphate transporter; exports phosphate from the vacuolar lumen to the cytosol; regulates phosphate and polyphosphate metabolism; acts upstream of Pho81p in regulation of the PHO pathway; localizes to sites of contact between the vacuole and mitochondria (vCLAMPs); deletion of pho84, pho87, pho89, pho90, and pho91 causes synthetic lethality; transcription independent of Pi …		PRELID1,PRELID2,PRELID3A,PRELID3B	Phosphatidic acid transfer protein; plays a role in phospholipid metabolism by transporting phosphatidic acid from the outer to the inner mitochondrial membrane; localizes to the mitochondrial intermembrane space; null mutant has altered cardiolipin and phosphatidic acid levels; ortholog of human PRELI
YNR067C	DSE4	-0.913144	-0.170521	0.742623	0.116807	0.270333	4.69574	4.02349	-0.672247	0.00107961	0.0205625						X							Daughter cell-specific secreted protein with similarity to glucanases; degrades cell wall from the daughter side causing daughter to separate from mother			Uridine nucleosidase (uridine-cytidine N-ribohydrolase); cleaves N-glycosidic bonds in nucleosides; involved in the pyrimidine salvage and nicotinamide riboside salvage pathways
YOL007C	CSI2	15.0963	11.2132	-3.88307	0.00224446	0.030321	-5.81319	-3.57413	2.23906	0.00464797	0.05342						X		X					Protein of unknown function; green fluorescent protein (GFP)- fusion protein localizes to the mother side of the bud neck and the vacuole; YOL007C is not an essential gene			Chitin transglycosylase; functions in the transfer of chitin to beta(1-6) and beta(1-3) glucans in the cell wall; similar to and functionally redundant with Crh1; glycosylphosphatidylinositol (GPI)-anchored protein localized to bud neck
YOL085C	YOL085C	16.0521	11.0939	-4.95816	0.0012936	0.0226414	-11.8797	-9.82462	2.05507	0.118557	0.294771															ZNHIT1	Nucleosome-binding component of the SWR1 complex; SWR1 exchanges histone variant H2AZ (Htz1p) for chromatin-bound histone H2A; required for vacuolar protein sorting
YOR017W	PET127	6.94108	6.22389	-0.717197	0.14385	0.302374	-3.40298	-2.19678	1.2062	0.000881124	0.0182764						X				X			Protein with a role in 5'-end processing of mitochondrial RNAs; located in the mitochondrial membrane			Homodimeric Zn2Cys6 zinc finger transcription factor; binds to a weak acid response element to induce transcription of PDR12 and FUN34, encoding an acid transporter and a putative ammonia transporter, respectively
YOR050C	YOR050C	0.0310229	-0.877046	-0.908069	0.000414695	0.0118086	-0.436588	0.39815	0.834738	0.00240738	0.0359133
YOR068C	VAM10	0.139353	2.28248	2.14312	0.000366862	0.0112163	-3.21268	-1.43035	1.78233	0.0759419	0.234775													Protein involved in vacuole morphogenesis; acts at an early step of homotypic vacuole fusion that is required for vacuole tethering
YOR080W	DIA2	-15.4392	-1.96609	13.4731	0.000824066	0.0167377	-13.8682	-19.078	-5.20974	0.00195591	0.0313696													Origin-binding F-box protein; forms SCF ubiquitin ligase complex with Skp1p and Cdc53p; functions in ubiquitination of silent chromatin structural protein Sir4p; required to target Cdc6p for destruction during G1 phase; required for deactivation of Rad53 checkpoint kinase, completion of DNA replication during recovery from DNA damage, assembly of RSC complex, RSC-mediated transcription regulation…
YOR104W	PIN2	-2.63377	0.0865124	2.72028	0.000223634	0.00875548	-1.65921	-3.31004	-1.65083	0.00314292	0.0419168						X							Exomer-dependent cargo protein; induces appearance of [PIN+] prion when overproduced; prion-like domain serves as a retention signal in the trans-Golgi network; predicted to be palmitoylated		CSNK1G2	Palmitoylated plasma membrane-bound casein kinase I (CK1) isoform; shares redundant functions with Yck1p in morphogenesis, proper septin assembly, endocytic trafficking, and glucose sensing; stabilized by Sod1p binding in the presence of glucose and oxygen, causing glucose repression of respiratory metabolism; involved in the phosphorylation and regulation of glucose sensor Rgt2p; YCK2 has a para…
YOR129C	AFI1	9.73983	7.62152	-2.11831	1.98059e-05	0.00179769	-2.81618	-0.930543	1.88563	0.000728822	0.016595						X							Arf3p polarization-specific docking factor; required for the polarized distribution of the ADP-ribosylation factor, Arf3p; participates in polarity development and maintenance of a normal haploid budding pattern; interacts with Cnm7p
YOR147W	MDM32	15.7378	10.7808	-4.95704	0.0025794	0.0333004	-7.22924	-4.05141	3.17783	7.4213e-05	0.00351162										X			Mitochondrial inner membrane protein with similarity to Mdm31p; required for normal mitochondrial morphology and inheritance; interacts genetically with MMM1, MDM10, MDM12, and MDM34; variation between SK1 and S288C at residues 182 and 262 impacts invasive growth and mitochondrial network structure
YOR192C	THI72	20.5813	12.3436	-8.23768	0.000350247	0.011179	-16.4283	-8.99099	7.4373	0.037693	0.165192								X					Transporter of thiamine or related compound; contributes to uptake of 5-aminoimidazole-4-carboxamide-1-beta-D-ribofuranoside (acadesine); shares sequence similarity with Thi7p
YOR199W	YOR199W	15.5516	10.8032	-4.74833	0.000449719	0.0121933	-8.79823	-6.11458	2.68365	0.289028	0.440174
YOR200W	YOR200W	13.2145	10.1718	-3.04267	0.00190608	0.02782	-4.40228	-2.63521	1.76706	0.00921446	0.0768454
YOR209C	NPT1	14.6782	10.4967	-4.18152	0.00164216	0.0256432	-5.12545	-4.05106	1.07439	0.255269	0.41852							X						Nicotinate phosphoribosyltransferase; acts in the salvage pathway of NAD+ biosynthesis; required for silencing at rDNA and telomeres and has a role in silencing at mating-type loci; localized to the nucleus
YOR214C	SPR2	0.976171	0.330644	-0.645528	0.000464074	0.0121933	0.913263	1.07263	0.159363	0.26459	0.427215													Putative spore wall protein; expression increases during sporulation; not an essential gene; YOR214C has a paralog, SPO19, that arose from the whole genome duplication
YOR220W	RCN2	13.0736	8.35285	-4.72077	0.00302708	0.0354521	-5.0027	-2.06353	2.93917	0.00412184	0.0503323							X						Protein of unknown function; green fluorescent protein (GFP)-fusion protein localizes to the cytoplasm; phosphorylated in response to alpha factor; protein abundance increases in response to DNA replication stress			Steryl ester hydrolase; one of three gene products (Yeh1p, Yeh2p, Tgl1p) responsible for steryl ester hydrolase activity and involved in sterol homeostasis; localized to lipid particle membranes; YEH1 has a paralog, YEH2, that arose from the whole genome duplication
YOR315W	SFG1	0.158686	1.27727	1.11859	0.00476626	0.0453474	-0.646207	0.0160475	0.662254	0.0143916	0.0990522						X							Nuclear protein putative transcription factor; required for growth of superficial pseudohyphae (which do not invade the agar substrate) but not for invasive pseudohyphal growth; may act together with Phd1p; potential Cdc28p substrate
YOR371C	GPB1	1.70388	1.00136	-0.702522	0.00604467	0.052097	1.0482	2.03761	0.989405	8.17081e-05	0.00369315									X				Multistep regulator of cAMP-PKA signaling; inhibits PKA downstream of Gpa2p and Cyr1p, thereby increasing cAMP dependency; promotes ubiquitin-dependent proteolysis of Ira2p; regulated by G-alpha protein Gpa2p; GPB1 has a paralog, GPB2, that arose from the whole genome duplication
YPL057C	SUR1	15.0059	5.93563	-9.07022	0.00285523	0.0344985	-14.6706	-10.5978	4.07285	0.0878225	0.252332						X		X					Mannosylinositol phosphorylceramide (MIPC) synthase catalytic subunit; forms a complex with regulatory subunit Csg2p; function in sphingolipid biosynthesis is overlapping with that of Csh1p; SUR1 has a paralog, CSH1, that arose from the whole genome duplication
YPL072W	UBP16	14.0902	11.3078	-2.78233	0.000170855	0.00751891	-5.9781	-4.49921	1.4789	0.0363586	0.16216										X			Deubiquitinating enzyme anchored to the outer mitochondrial membrane; probably not important for general mitochondrial functioning, but may perform a more specialized function at mitochondria
YPL148C	PPT2	15.854	10.0733	-5.78073	0.00063323	0.0147137	-6.13049	-3.3394	2.79109	0.0334243	0.153885						X		X		X			Phosphopantetheine:protein transferase (PPTase); activates mitochondrial acyl carrier protein (Acp1p) by phosphopantetheinylation
YPL163C	SVS1	0.0648989	0.264012	0.199113	0.565224	0.551638	-0.134675	0.615659	0.750334	0.000538612	0.0145635						X							Cell wall and vacuolar protein; required for wild-type resistance to vanadate; SVS1 has a paralog, SRL1, that arose from the whole genome duplication
YPL166W	ATG29	1.94578	0.346634	-1.59914	0.001132	0.0207169	2.91426	3.13936	0.225097	0.0755688	0.234477							X						Autophagy-specific protein; required for recruiting other ATG proteins to the pre-autophagosomal structure (PAS); interacts with Atg17p and localizas to the PAS in a manner interdependent with Atg17p and Cis1p; not conserved; relocalizes from nucleus to cytoplasmic foci upon DNA replication stress		PUDP
YPL168W	MRX4	-1.10362	-1.72387	-0.620244	0.276516	0.40678	3.54529	2.25511	-1.29019	0.0006574	0.0163184									X	X					NDUFAF7
YPL179W	PPQ1	-1.54703	-0.762408	0.784626	0.00323695	0.0365825	-1.20983	-1.28222	-0.0723883	0.666182	0.6185													Protein phosphatase that regulates the mating response; negatively regulates the MAP kinase signaling cascade during mating; member of the serine/threonine phosphatase PP1 family			Protein of unknown function; overexpression causes a cell cycle delay or arrest; null mutation results in a decrease in plasma membrane electron transport; YLR149C is not an essential gene; protein abundance increases in response to DNA replication stress
YPL180W	TCO89	-2.50535	-0.538896	1.96645	0.0034564	0.037741	1.1714	0.0334882	-1.13791	0.0346741	0.157691													Subunit of TORC1 (Tor1p or Tor2p-Kog1p-Lst8p-Tco89p); regulates global H3K56ac; TORC1 complex regulates growth in response to nutrient availability; cooperates with Ssd1p in the maintenance of cellular integrity; deletion strains are hypersensitive to rapamycin
YPR046W	MCM16	10.1649	7.05846	-3.10647	0.0025064	0.0329403	-5.85955	-5.70564	0.153907	0.535814	0.565378													Component of the Ctf19 complex and the COMA subcomplex; involved in kinetochore-microtubule mediated chromosome segregation; binds to centromere DNA; orthologous to human centromere constitutive-associated network (CCAN) subunit CENP-H and fission yeast fta3
YPR053C	YPR053C	1.60941	0.0466587	-1.56275	0.00207763	0.0289595	3.41953	4.38134	0.961811	0.0292546	0.143428
YPR060C	ARO7	0.778753	2.38249	1.60374	0.00505559	0.0467641	0.273882	-0.0960211	-0.369903	0.327602	0.465554							X						Chorismate mutase; catalyzes the conversion of chorismate to prephenate to initiate the tyrosine/phenylalanine-specific branch of aromatic amino acid biosynthesis
YPR146C	YPR146C	0.547635	0.500089	-0.0475461	0.518064	0.534358	-0.00876041	1.79889	1.80765	1.12072e-08	2.12121e-06										X					TIGAR	Phosphatase with a broad substrate specificity; has some similarity to GPM1/YKL152C, a phosphoglycerate mutase; YOR283W is not an essential gene
YPR149W	NCE102	-0.39129	-0.0349079	0.356382	0.305469	0.423732	-0.259981	0.618227	0.878208	0.000193056	0.00690548						X	X			X			Protein of unknown function; contains transmembrane domains; involved in secretion of proteins that lack classical secretory signal sequences; component of the detergent-insoluble glycolipid-enriched complexes (DIGs); NCE102 has a paralog, FHN1, that arose from the whole genome duplication		DCAF7
YPR201W	ARR3	0.893104	-0.279816	-1.17292	0.000291588	0.00984786	1.90867	2.54658	0.637909	0.0815641	0.241452													Plasma membrane metalloid/H+ antiporter; member of bile/arsenite/riboflavin transporter (BART) superfamily; transports arsenite and antimonite; required for resistance to arsenic compounds; transcription is activated by Arr1p in the presence of arsenite		RAB17,RAB20,RAB22A,RAB24,RAB31,RAB5A,RAB5B,RAB5C	Stress-induced Rab family GTPase; required for vacuolar protein sorting and endocytosis; involved in ionic stress tolerance; similar to Vps21p and Ypt52p; functional homolog of Vps21p; mammalian Rab5 homolog; YPT53 has a paralog, VPS21, that arose from the whole genome duplication
YAL027W	SAW1	-0.093555	-0.226438	-0.132883	0.265034	0.398236	-0.237301	-0.979718	-0.742417	0.000167266	0.00633175	X	X			X								5'- and 3'-flap DNA binding protein; recruits Rad1p-Rad10p to single-strand annealing intermediates with 3' non-homologous tails for removal during double-strand break repair; complexes with Rad1p-Rad10p and stimulates its endonuclease activity; green fluorescent protein (GFP)-fusion protein localizes to the nucleus		PPAT	Phosphoribosylpyrophosphate amidotransferase (PRPPAT); catalyzes first step of the 'de novo' purine nucleotide biosynthetic pathway; also known as amidophosphoribosyltransferase
YDL013W	SLX5	-11.5845	-1.92613	9.65834	0.00106298	0.0200481	-13.3024	-18.7323	-5.42991	0.00210409	0.0330152	X				X								Subunit of the Slx5-Slx8 SUMO-targeted Ub ligase (STUbL) complex; role in Ub-mediated degradation of histone variant Cse4p preventing mislocalization to euchromatin; role in proteolysis of spindle positioning protein Kar9p, and DNA repair proteins Rad52p and Rad57p; forms SUMO-dependent nuclear foci, including DNA repair centers; contains a RING domain and two SIM motifs; associates with the cent…		C9orf69,SEPT12,SEPT3,SEPT9	Component of the septin ring, required for cytokinesis; septins are GTP-binding proteins that assemble into rod-like hetero-oligomers that can associate to form filaments; septin rings at the mother-bud neck act as scaffolds for recruiting cell division factors and as barriers to prevent diffusion of specific proteins between mother and daughter cells; N-terminus interacts with phosphatidylinosit…
YDR369C	XRS2	-12.774	-3.31183	9.46218	9.92387e-07	0.000169552	-6.80753	-13.813	-7.00544	5.4732e-07	5.91957e-05	X	X			X								Protein required for DNA repair; component of the Mre11 complex, which is involved in double strand breaks, meiotic recombination, telomere maintenance, and checkpoint signaling			Multistep regulator of cAMP-PKA signaling; inhibits PKA downstream of Gpa2p and Cyr1p, thereby increasing cAMP dependency; promotes ubiquitin-dependent proteolysis of Ira2p; regulated by G-alpha protein Gpa2p; GPB1 has a paralog, GPB2, that arose from the whole genome duplication
YDR433W	YDR433W	-5.28404	3.71025	8.99429	0.00337075	0.0375238	-17.1865	-21.0664	-3.87988	0.0168054	0.106918	X														TMEM184A,TMEM184B,TMEM184C	Protein of unknown function that interacts with Atg8p; null mutant is defective in stationary phase-induced vacuolar microdomain formation; homolog of S. pombe hfl1
YGL175C	SAE2	0.0683933	-0.339186	-0.407579	0.113502	0.265952	-0.259932	-1.77661	-1.51667	1.03594e-07	1.4939e-05	X	X			X	X							Endonuclease required for telomere elongation; required for telomeric 5' C-rich strand resection; involved in ds-break repair and processing hairpin DNA structures with the MRX complex; function requires sumoylation and phosphorylation; exists as inactive oligomers that are transiently released into smaller active units by phosphorylation; DNA damage triggers Sae2p removal, so active Sae2p is pre…		MRPS14	Mitochondrial ribosomal protein of the small subunit
YHL006C	SHU1	-0.145529	-0.663478	-0.517948	0.011399	0.0752462	3.80385	3.10824	-0.695604	0.000214083	0.00753858	X	X											Component of Shu complex (aka PCSS complex); Shu complex also includes Psy3, Csm2, Shu2, and promotes error-free DNA repair, mediates inhibition of Srs2p function; essential for promoting the establishment of homolog bias during meiotic homologous recombination; promotes both crossover (CO) and non-crossover (NCO) pathways of meiotic recombination and formation of Rad51p filaments		MTG1	Putative GTPase peripheral to the mitochondrial inner membrane; essential for respiratory competence, likely functions in assembly of the large ribosomal subunit, has homologs in plants and animals
YHL025W	SNF6	-0.741233	0.577913	1.31915	0.578382	0.554957	-1.87224	-4.53735	-2.66512	0.00304326	0.0418913	X		X		X								Subunit of the SWI/SNF chromatin remodeling complex; involved in transcriptional regulation; functions interdependently in transcriptional activation with Snf2p and Snf5p; relocates to the cytosol under hypoxic conditions	LYRM7	LYRM7	Protein required for assembly of the cytochrome bc(1) complex; acts as a chaperone for Rip1p and facilitates its insertion into the complex at a late stage of assembly; localized to the mitochondrial matrix; null mutant exhibits a respiratory growth defect and reduced mitochondrial zinc levels, which is characteristic of mutations affecting bc(1) complex assembly; member of the LYR protein family…
YHR134W	WSS1	-4.0769	-3.43645	0.640443	0.456974	0.507989	-2.85539	-5.84627	-2.99088	2.45098e-05	0.00145538	X	X		X	X			X					SUMO-ligase and SUMO-targeted metalloprotease; involved in DNA repair; removes DNA-protein crosslinks at stalled replication forks during replication of damaged DNA; clears chromatin-bound sumoylated proteins; localizes to single spot on nuclear periphery of mother cells but not daughters; exhibits vacuolar localization upon genotoxic stress; activated by DNA binding; member of minigluzincins pro…		NUP107	Subunit of the Nup84p subcomplex of the nuclear pore complex (NPC); contributes to nucleocytoplasmic transport and NPC biogenesis; also plays roles in several processes that may require localization of genes or chromosomes at the nuclear periphery, including double-strand break repair, transcription and chromatin silencing; homologous to human NUP107
YIL132C	CSM2	0.208217	-0.821946	-1.03016	0.000207344	0.00848208	-0.249787	-0.949374	-0.699587	0.00024436	0.00831472	X	X		X		X		X					Component of Shu complex (aka PCSS complex); Shu complex also includes Psy3, Shu1, Shu2, and promotes error-free DNA repair,; Shu complex mediates inhibition of Srs2p function; promotes formation of Rad51p filaments; Psy3p and Csm2p contain similar DNA-binding regions which work together to form a single DNA binding site; required for accurate chromosome segregation during meiosis		PET117	Assembly factor that couples heme a synthesis to complex IV assembly; regulates the oligomerization state of the Cox15p heme a synthase, and couples this to the assembly of the cytochrome C oxidase complex (complex IV)
YJR052W	RAD7	0.24699	3.09033	2.84334	1.94364e-07	4.70441e-05	-1.29501	-4.85596	-3.56095	1.63182e-09	4.94172e-07	X		X		X								Nucleotide excision repair (NER) protein; binds damaged DNA during NER; binds DNA in an ATP-dependent manner (with Rad16p) during NER; required for repair of non-transcribed chromatin; subunit of Nucleotide Excision Repair Factor 4 (NEF4) and the Elongin-Cullin-Socs (ECS) ligase complex		ERCC1	Single-stranded DNA endonuclease (with Rad1p); cleaves single-stranded DNA during nucleotide excision repair and double-strand break repair; subunit of Nucleotide Excision Repair Factor 1 (NEF1); homolog of human ERCC1 protein
YKL054C	DEF1	-18.9159	0.223789	19.1397	0.0029925	0.0352414	-15.7035	-22.8152	-7.11171	0.00140581	0.025341	X		X										RNAPII degradation factor; forms a complex with Rad26p in chromatin, enables ubiquitination and proteolysis of RNAPII present in an elongation complex; mutant is deficient in Zip1p loading onto chromosomes during meiosis		ATRX,RAD54B,RAD54L,RAD54L2	DNA-dependent ATPase that stimulates strand exchange; modifies the topology of double-stranded DNA; involved in the recombinational repair of double-strand breaks in DNA during vegetative growth and meiosis; member of the SWI/SNF family of DNA translocases; forms nuclear foci upon DNA replication stress
YLL002W	RTT109	-9.63537	-6.45032	3.18505	0.131022	0.286344	-5.43415	-9.78019	-4.34605	0.00242847	0.0359486	X	X			X	X							Histone acetyltransferase; critical for cell survival in presence of DNA damage during S phase, required for recovery after DSB repair; acetylates H3K56, H3K9; H3K56 acetylation activity required for expression homeostasis, buffering of mRNA synthesis rate against changes in gene dosage during S phase; involved in non-homologous end joining and regulation of Ty1 transposition; prevents hyper-ampl…		CD3EAP	RNA polymerase I subunit A34.5; essential for nucleolar assembly and for high polymerase loading rate; nucleolar localization depends on Rpa49p
YLR235C	YLR235C	-10.2892	13.2076	23.4968	7.28622e-11	8.03507e-08	-9.23226	-17.9039	-8.67166	1.81276e-09	4.99063e-07	X				X	X									RTF1	Subunit of RNAPII-associated chromatin remodeling Paf1 complex; regulates gene expression by directing cotranscriptional histone modification, influences transcription and chromatin structure through several independent functional domains; directly or indirectly regulates DNA-binding properties of Spt15p and relative activities of different TATA elements; involved in transcription elongation as d…
YML011C	RAD33	-0.56298	-1.59902	-1.03604	0.002619	0.0334591	-0.293504	-3.533	-3.2395	9.17169e-07	8.67973e-05	X		X		X								Protein involved in nucleotide excision repair; green fluorescent protein (GFP)-fusion protein localizes to the nucleus		GOLGA7,GOLGA7B	Palmitoyltransferase subunit; this complex adds a palmitoyl lipid moiety to heterolipidated substrates such as Ras1p and Ras2p through a thioester linkage; palmitoylation is required for Ras2p membrane localization; Palmitoyltransferase is composed of Shr5p and Erf2
YPL024W	RMI1	0.813374	-1.48878	-2.30216	5.68428e-05	0.00368144	1.38726	0.119024	-1.26823	0.000645545	0.0161565	X												Subunit of the RecQ (Sgs1p) - Topo III (Top3p) complex; stimulates superhelical relaxing, DNA catenation/decatenation and ssDNA binding activities of Top3p; involved in response to DNA damage; functions in S phase-mediated cohesion establishment via a pathway involving the Ctf18-RFC complex and Mrc1p; stimulates Top3p DNA catenation/decatenation activity; null mutants display increased rates of r…
